# Supplementary material for: I2–DMSO mediated multicomponent convergent synthesis of imidazo[2,1-a]isoquinoline derivatives via a triple in situ cross-trapping strategy
Source: Royal Society of Chemistry journal article supplement (doi:10.1039/d3qo00724c), 2023-01-01

# Supporting Information

## **I<sub>2</sub>-DMSO mediated multicomponent convergent synthesis of imidazo[2,1-*a*]isoquinoline derivatives via a triple *in situ* cross-trapping strategy**

*Yong-Xing Tang, Shi-Yi Zhuang, Jin-Yi Liu, You Zhou, Li-Sheng Wang, Yan-Dong Wu, An-Xin Wu*

*National Key Laboratory of Green Pesticide, International Joint Research Center for Intelligent Biosensor Technology and Health, College of Chemistry, Central China Normal University, Wuhan 430079, P.R. China.*

*E-mail: chwuax@mail.ccnu.edu.cn*

### **Contents**

|                                                                                           |         |
|-------------------------------------------------------------------------------------------|---------|
| 1. General.....                                                                           | S2      |
| 2. Experimental procedures.....                                                           | S3-S7   |
| 3. Substrate scope.....                                                                   | S7-S9   |
| 4. Mechanistic study.....                                                                 | S10-S18 |
| 5. The crystallographic data.....                                                         | S19-S24 |
| 6. Spectroscopic data.....                                                                | S25-S40 |
| 7. Copies of <sup>1</sup> H NMR, <sup>13</sup> C NMR and <sup>19</sup> F NMR spectra..... | S41-S83 |

## 1. General

All of the substrates and reagents were commercially available and used without further purification. TLC analysis was performed using pre-coated glass plates. Flash column chromatography was performed on silica gel (200–300 mesh).  $^1\text{H}$  NMR spectra were determined at 25 °C on a Varian Mercury 400 MHz spectrometer. Chemical shifts were provided in ppm relative to the internal standard of tetramethylsilane (TMS).  $^{13}\text{C}$  spectra were recorded in  $\text{CDCl}_3$  or  $\text{DMSO-}d_6$  on 100 MHz NMR spectrometers and resonances ( $\delta$ ) in ppm. The data is being reported as s = singlet, d = doublet, t = triplet, m = multiplet or unresolved coupling constant(s) in Hz, integration. HRMS were obtained on Thermo Scientific Q Exactive equipped with an electron spray ionization source. Melting points were determined by using an electrothermal capillary melting point apparatus and not corrected. The X-ray crystal-structures were obtained on a Bruker APEX DUO CCD system.

## 2. Experimental procedures

### 2.1 General procedure for the synthesis of 3 (3a as an example)

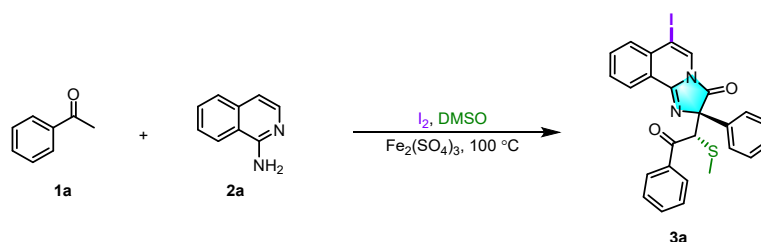

**General procedure:** A tube equipped with a magnetic stirring bar was charged with acetophenone (**1a**) (120.0 mg, 1.0 mmol), isoquinolin-1-amine (**2a**) (72.0 mg, 0.5 mmol), iodine (406.0 mg, 1.6 mmol) and Fe<sub>2</sub>(SO<sub>4</sub>)<sub>3</sub> (120.0 mg, 0.3 mmol) at room temperature, and DMSO (3 mL) was added. The resulting mixture was stirred at 100 °C for 1 h. After the reaction completed, the mixture was quenched with saturation Na<sub>2</sub>S<sub>2</sub>O<sub>3</sub> solution (50 mL), extracted with EtOAc (3 × 50 mL). The combined organic layers were washed with brine, dried over anhydrous Na<sub>2</sub>SO<sub>4</sub> and concentrated under reduced pressure. The residue was purified by column chromatography on silica gel (petroleum ether/EtOAc = 15:1) to yield the desired product **3a** (176.0 mg, yield 64%) as yellow solid (R<sub>f</sub> = 0.3).

### 2.2 General procedure for the synthesis of 3a in a 10.0 mmol scale

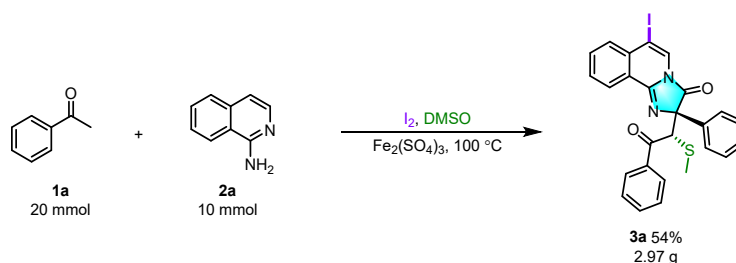

A 100 mL round-bottomed flask was charged with acetophenone (**1a**) (2.4 g, 20.0 mmol), isoquinolin-1-amine (**2a**) (1.44 g, 10.0 mmol), iodine (8.13 g, 32.0 mmol) and Fe<sub>2</sub>(SO<sub>4</sub>)<sub>3</sub> (2.40 g, 6.0 mmol) at room temperature, and DMSO (50 mL) was added. The resulting mixture was stirred at 100 °C for 1.5 h in oil bath. After the reaction completed, the mixture was quenched with saturation Na<sub>2</sub>S<sub>2</sub>O<sub>3</sub> solution (200 mL), extracted with EtOAc (3 × 200 mL). The combined organic layers were washed with brine, dried over anhydrous Na<sub>2</sub>SO<sub>4</sub> and concentrated under reduced pressure. The residue was purified by column chromatography on silica gel (petroleum ether/EtOAc = 15:1) to yield the desired product **3a** (2.97 g, yield 54%) as yellow solid (R<sub>f</sub> = 0.3).

### 2.3 Procedure for the synthesis of 5<sup>[1]</sup>

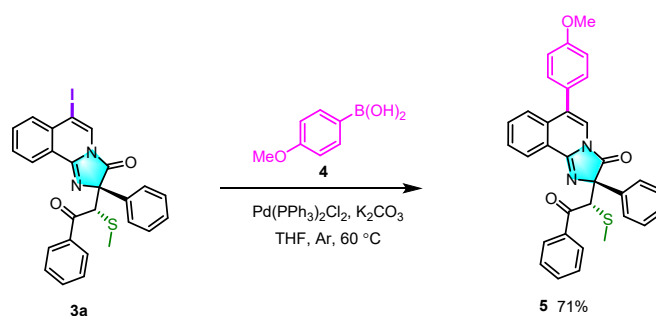

A 25 ml Schlenk tube equipped with a magnetic stirring bar was charged with a mixture of **3a** (110.0 mg, 0.2 mmol), **4** (30.4 mg, 0.2 mmol), Pd(PPh<sub>3</sub>)<sub>2</sub>Cl<sub>2</sub> (14.0 mg, 0.02 mmol), K<sub>2</sub>CO<sub>3</sub> (82.8 mg, 0.6 mmol). Under reduced pressure, the tube was filled with argon for three times. After the addition of THF (2 mL), the reaction was stirred at 60 °C for 12 h. After the reaction completed, the mixture was quenched with saturation NaCl solution (50 mL), extracted with EtOAc (3 × 50 mL). The combined organic layers were washed with brine, dried over anhydrous Na<sub>2</sub>SO<sub>4</sub> and concentrated under reduced pressure. The residue was purified by column chromatography on silica gel (petroleum ether/EtOAc = 20:1) to yield the desired product **5** (75.3 mg, yield 71%) as yellow solid (R<sub>f</sub> = 0.32).

#### 2.4 Procedure for the synthesis of **7** [1]

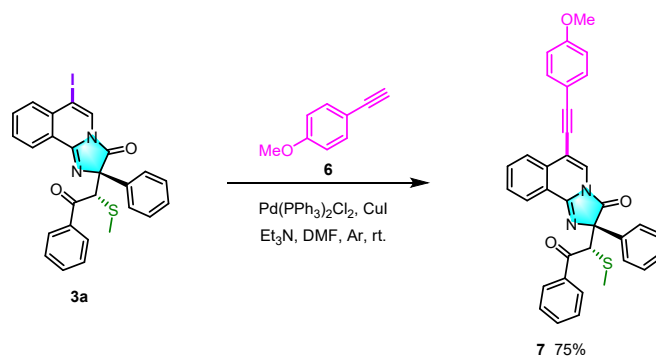

A 25 ml Schlenk tube equipped with a magnetic stirring bar was charged with a mixture of **3a** (110.0 mg, 0.2 mmol), **6** (31.7 mg, 0.24 mmol), Pd(PPh<sub>3</sub>)<sub>2</sub>Cl<sub>2</sub> (7.0 mg, 0.01 mmol), CuI (3.8 mg, 0.02 mmol). Under reduced pressure, the tube was filled with argon for three times. After the addition of DMF (1 mL) and Et<sub>3</sub>N (2 mL), the reaction was stirred at room temperature for 12 h. After the reaction completed, the mixture was quenched with saturation NaCl solution (50 mL), extracted with EtOAc (3 × 50 mL). The combined organic layers were washed with brine, dried over anhydrous Na<sub>2</sub>SO<sub>4</sub> and concentrated under reduced pressure. The residue was purified by column chromatography on silica gel (petroleum ether/EtOAc = 30:1) to yield the desired product **7** (83.1

mg, yield 75%) as yellow solid ( $R_f = 0.28$ ).

## 2.5 Procedure for the synthesis of **8** [2]

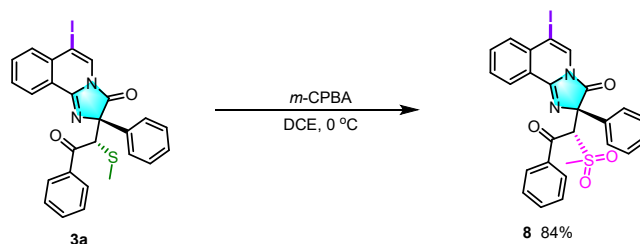

A solution of **3a** (181.5 mg, 0.33 mmol) in 10 mL DCE was cooled to 0 °C. Then, *m*-CPBA (114.0 mg, 0.66 mmol) dissolved in 15 mL DCE was added drop wise to the stirred solution of **3a**. The reaction progress was monitored by TLC. After stirring for 3 h, water was added and the reaction mixture was extracted with  $\text{CH}_2\text{Cl}_2$  ( $3 \times 10$  mL). The organic layer was dried over  $\text{Na}_2\text{SO}_4$ . Removal of the solvent followed by purification on silica gel (petroleum ether/EtOAc = 8:1) to yield the desired product **8** (161.3 mg, yield 84%) as a yellow solid ( $R_f = 0.32$ ).

## 2.6 Procedure for the synthesis of **9** [3]

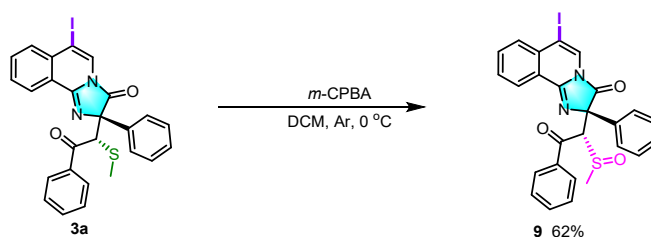

A solution of **3a** (165.0 mg, 0.3 mmol) and *m*-CPBA (48.0 mg, 0.28 mmol) in dry  $\text{CH}_2\text{Cl}_2$  (6 mL) was stirred under Ar at 0 °C for 25 min. To the resulting suspension sat.  $\text{NaHCO}_3$  (25 mL) was added at 0 °C. The organic layer was diluted with EtOAc (50 mL), washed with sat.  $\text{NaHCO}_3$  ( $3 \times 100$  mL), brine ( $3 \times 100$  mL), dried over anhydrous  $\text{Na}_2\text{SO}_4$  and concentrated under reduced pressure. The residue was purified by column chromatography on silica gel (petroleum ether/EtOAc = 5:1) to yield the desired product **9** (105.3 mg, yield 62%) as a yellow solid ( $R_f = 0.30$ ).

## 2.7 Procedure for the synthesis of **2aa**

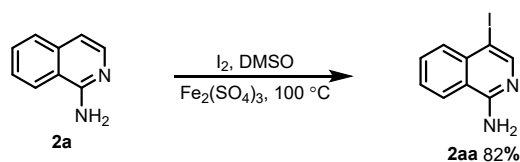

A tube equipped with a magnetic stirring bar was charged with isoquinolin-1-amine (**2a**) (72.0 mg, 0.5 mmol), iodine (406.0 mg, 1.6 mmol) and  $\text{Fe}_2(\text{SO}_4)_3$  (120.0 mg, 0.3 mmol) at room temperature, and DMSO (3 mL) was added. The resulting mixture was stirred at 100 °C for 1 h. After the reaction

completed, the mixture was quenched with saturation  $\text{Na}_2\text{S}_2\text{O}_3$  solution (50 mL), extracted with EtOAc ( $3 \times 50$  mL). The combined organic layers were washed with brine, dried over anhydrous  $\text{Na}_2\text{SO}_4$  and concentrated under reduced pressure. The residue was purified by column chromatography on silica gel (petroleum ether/EtOAc = 8:1) to yield the product **2aa** (110.7 mg, yield 82%) as yellow solid ( $R_f = 0.3$ ).

## 2.8 Procedure for the synthesis of **1ae** [4]

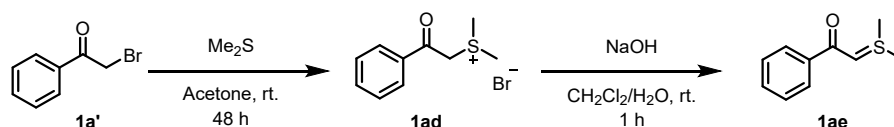

**Step-I:** To a 0.5 M solution of bromoketone **1a'** (5 mmol, 1.0 equiv.) in acetone dimethyl sulfide (440  $\mu\text{L}$ , 6.0 mmol, 1.2 equiv.) was added and the mixture was stirred for 48 h at room temperature. Then, the precipitate of sulfonium salt **1ad** was separated from the solution, washed with acetone and dried under reduced pressure to give pure sulfonium salt **1ad**, which was readily converted to the corresponding sulfonium ylide **1ae** (Step-II).

**Step-II:** To a suspension of sulfonium salt **1ad** (1.0 mmol, 1 equiv.) in 5 mL  $\text{CH}_2\text{Cl}_2$  a solution of NaOH (5.0 mmol, 5 equiv.) in 5 mL  $\text{H}_2\text{O}$  was added and the mixture was intensively stirred for 1 h at room temperature. Then the reaction mixture was filtered through cotton wool. The organic layer was separated and the aqueous layer was washed with  $\text{CH}_2\text{Cl}_2$  ( $5 \times 15$  mL). The combined organic layer was dried over anhydrous sodium sulfate, filtered, and concentrated under reduced pressure. The residue was dried in a vacuum until constant weight to give sulfonium ylides **1ae**, which was immediately characterized and used in the next stage.

## 2.9 Procedure for the synthesis of **1ac** from **1ae**

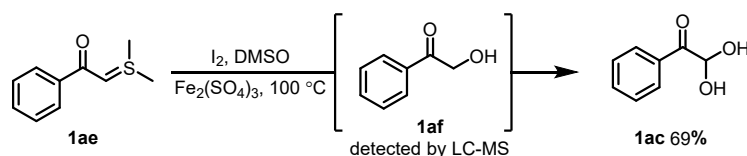

A tube equipped with a magnetic stirring bar was charged with sulfonium ylides (**1ae**) (90.0 mg, 0.5 mmol), iodine (203.0 mg, 1.6 mmol) and  $\text{Fe}_2(\text{SO}_4)_3$  (60.0 mg, 0.3 mmol) at room temperature, and DMSO (3 mL) was added. The resulting mixture was stirred at  $100^\circ\text{C}$  for 1 h. After the reaction completed, the mixture was quenched with saturation  $\text{Na}_2\text{S}_2\text{O}_3$  solution (50 mL), extracted with EtOAc ( $3 \times 50$  mL). The combined organic layers were washed with brine, dried over anhydrous

$\text{Na}_2\text{SO}_4$  and concentrated under reduced pressure. The residue was purified by column chromatography on silica gel (petroleum ether/EtOAc = 1:1) to yield **1ac** (52.4 mg, yield 69%) as white solid ( $R_f = 0.2$ ).

### 3. Substrate scope

#### 3.1 Substrate scope of methyl ketone

We have done several experiments using different acetophenone with other reactive functional groups, unfortunately, the desired product was not obtained by column chromatography. We speculate that the obstacle to this conversion is may be due to the fact that the substrate is too active, which increases the side reaction and complicates the reaction.

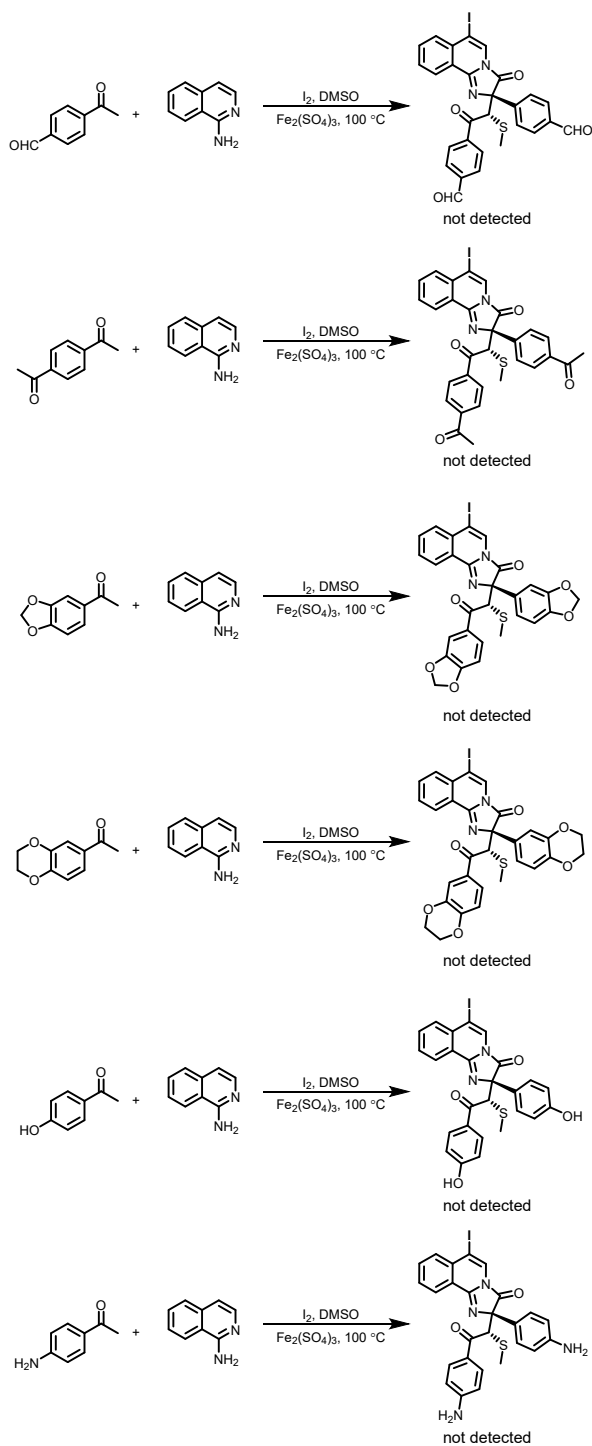



### 3.2 Substrate scope of amine

The 2-aminoquinoline was used to react under the standard conditions, unfortunately, the desired product was not isolated by column chromatography, and the desired product was also not detected by detection of the crude reaction extract by LC-MS analysis. When we used pyridin-2-amine to react under the standard conditions, this process was converted to other product.

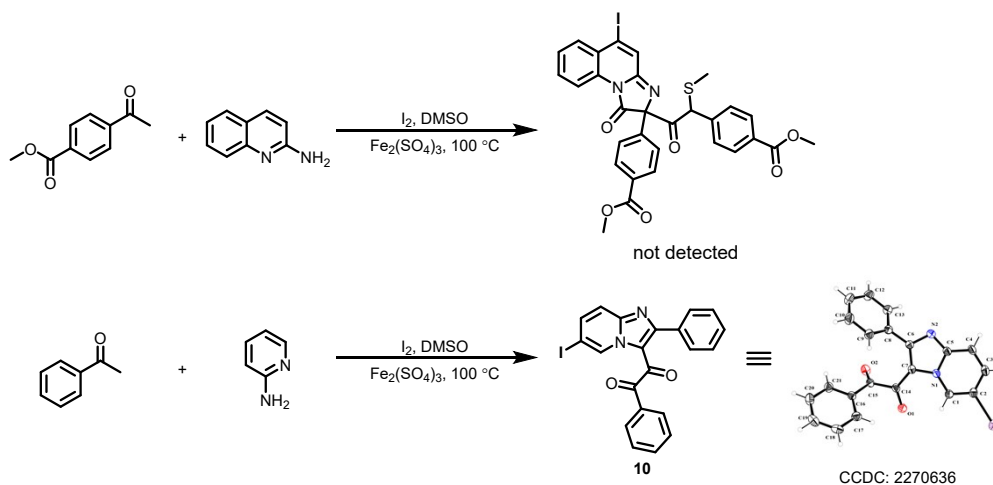

### 3.3 Substrate scope of sulfoxide

We have done several experiments using different solvents. Unfortunately, the desired product was not isolated by column chromatography, and the desired product was also not detected by detection of the crude reaction extract by LC-MS analysis when using other solvents.

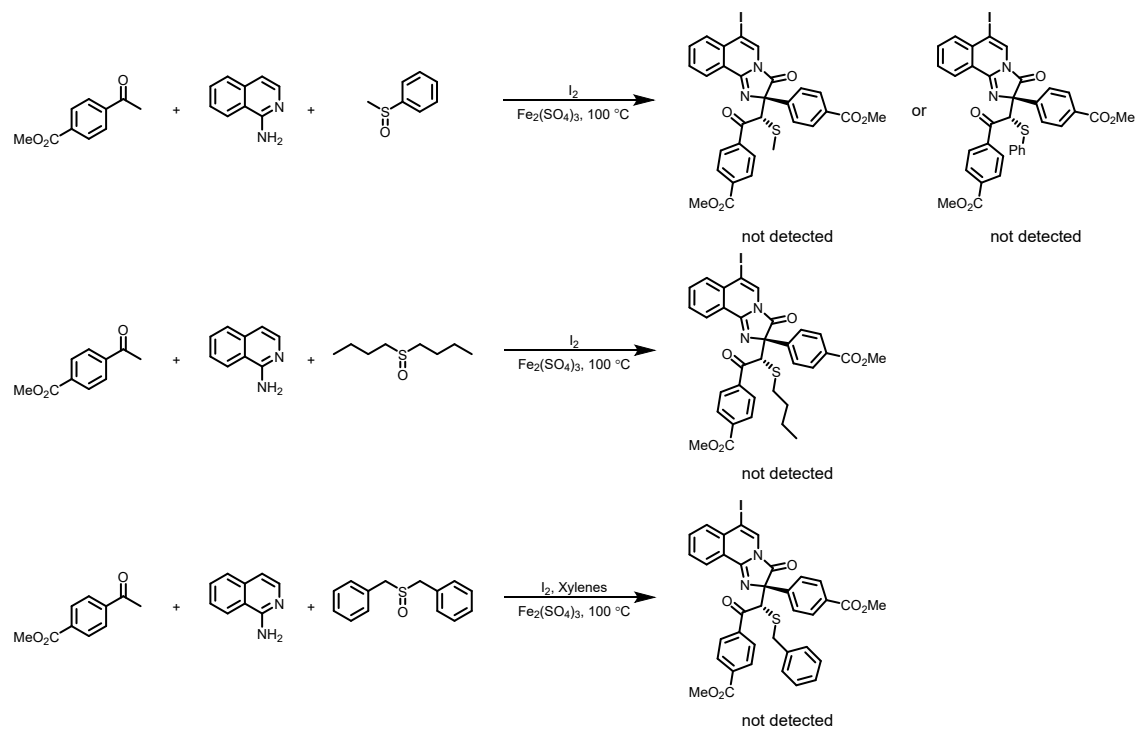



## 4. Mechanistic study

### 4.1 HPLC-MS of the intermediate 1af

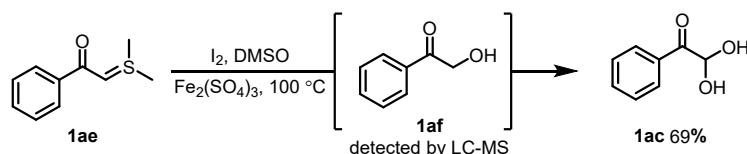

A tube equipped with a magnetic stirring bar was charged with sulfonium ylides (**1ae**) (90.0 mg, 0.5 mmol), iodine (203.0 mg, 1.6 mmol) and  $Fe_2(SO_4)_3$  (60.0 mg, 0.3 mmol) at room temperature, and DMSO (3 mL) was added. The resulting mixture was stirred at  $100\text{ }^\circ\text{C}$  for 1 h. Then, the 1 mL of the reaction solution was quenched with 4 mL of saturation  $Na_2S_2O_3$  solution, and then extracted with 3 mL of EtOAc. Then 0.5 mL of the extraction solution was added into the test bottle and diluted with 0.5 mL of MeOH. The samples were immediately monitored by HPLC-MS.

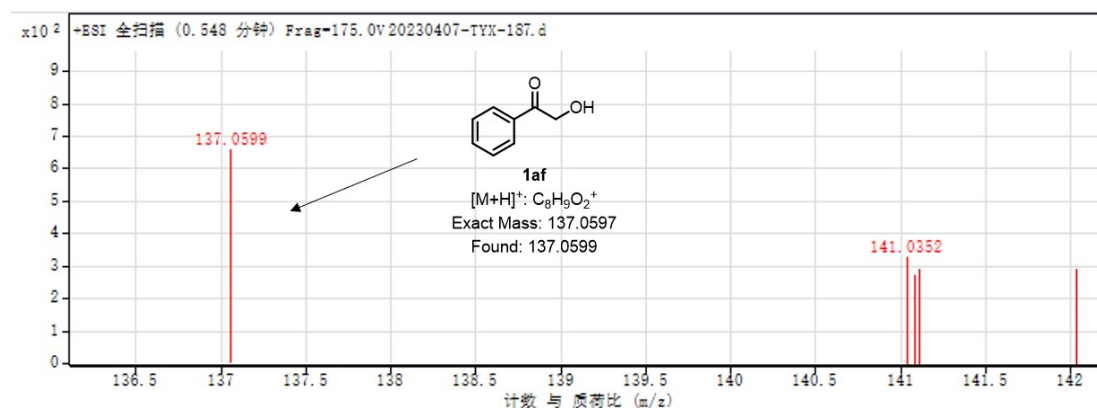

### 4.2 The mechanism of HPLC-MS

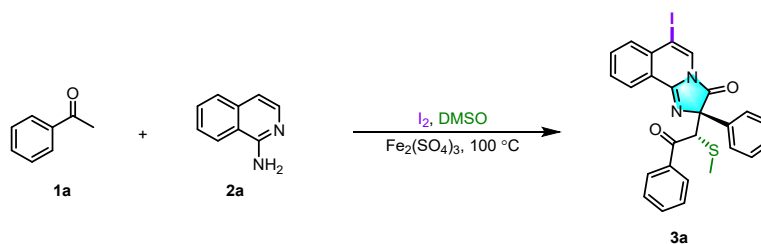

A tube equipped with a magnetic stirring bar was charged with acetophenone (**1a**) (120.0 mg, 1.0 mmol), isoquinolin-1-amine (**2a**) (72.0 mg, 0.5 mmol), iodine (406.0 mg, 1.6 mmol) and  $Fe_2(SO_4)_3$  (120.0 mg, 0.3 mmol) at room temperature, and DMSO (3 mL) was added. The resulting mixture was stirred at  $100\text{ }^\circ\text{C}$  for 15 min. Then, the 0.5 mL of the reaction solution was diluted with 1.5 mL of EtOAc. The samples were immediately monitored by HPLC-MS.

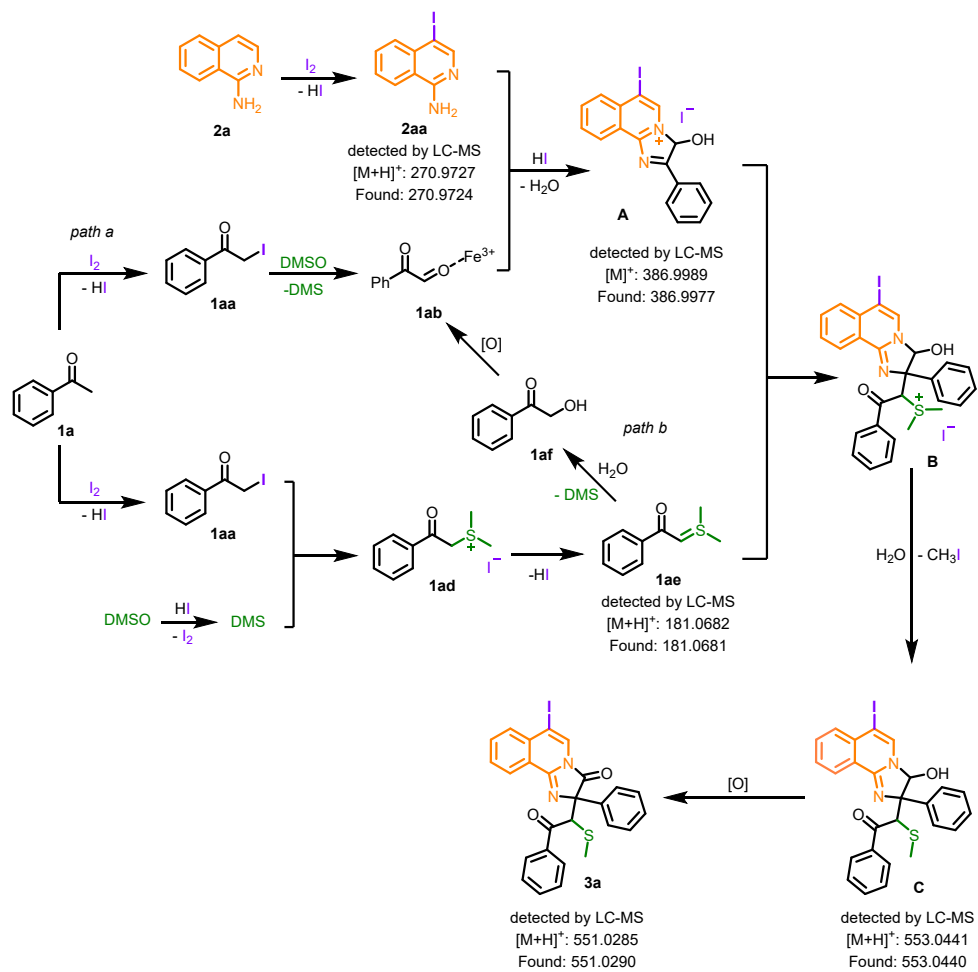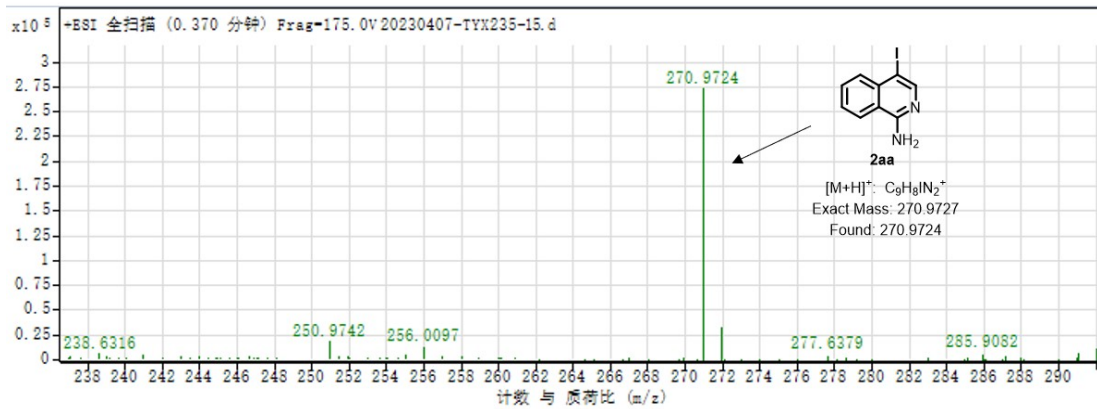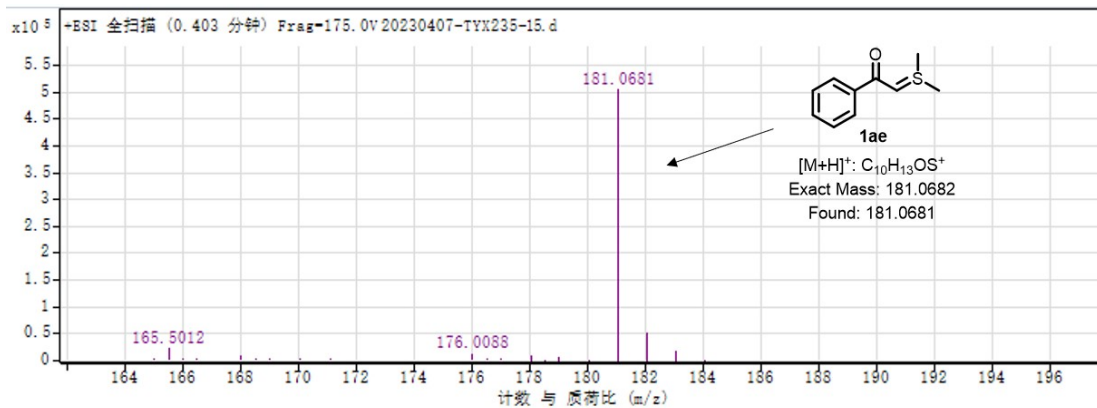

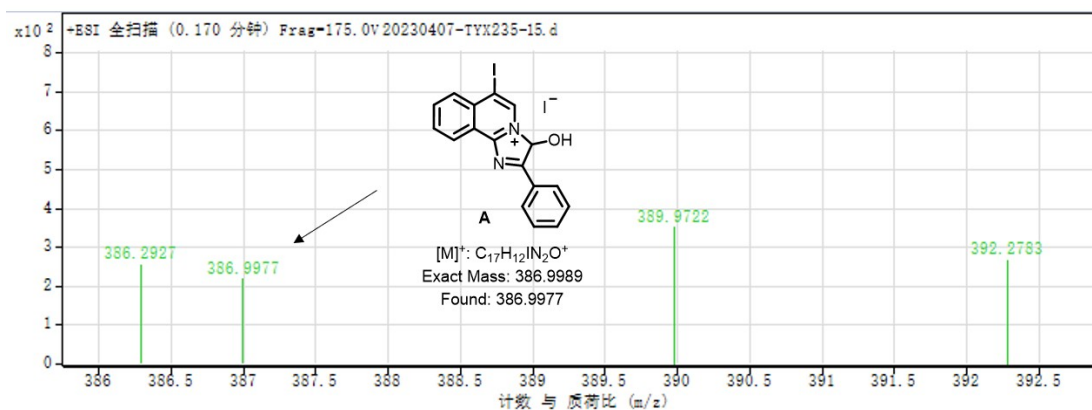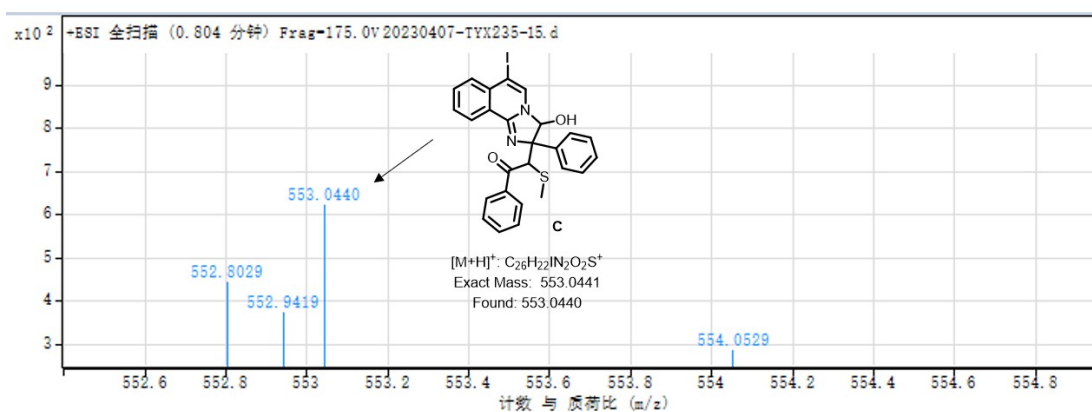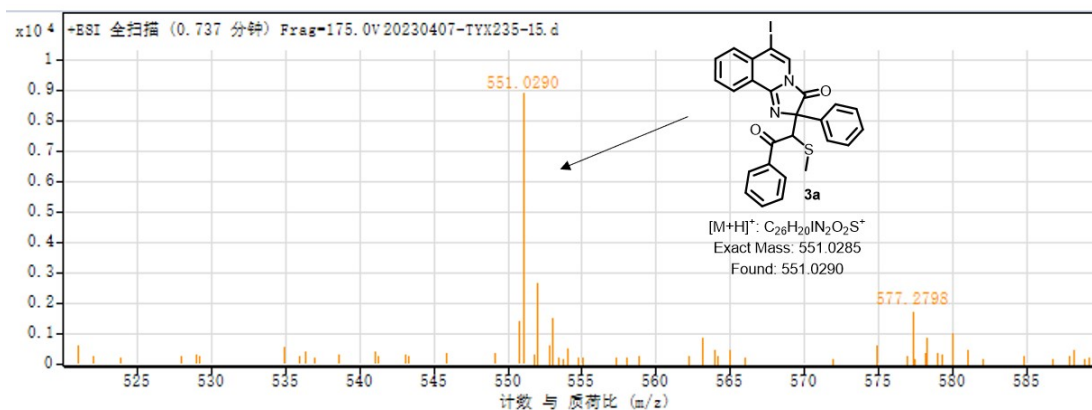

### 4.3 Discuss the role of Fe<sub>2</sub>(SO<sub>4</sub>)<sub>3</sub>

In order to further understand the role of Fe<sub>2</sub>(SO<sub>4</sub>)<sub>3</sub>, we conducted following control experiments. Isoquinolin-1-amine (**2a**) could be iodinated to 4-iodoisoquinolin-1-amine (**2aa**) in 80% yield without addition of Fe<sub>2</sub>(SO<sub>4</sub>)<sub>3</sub> (a). In the absence of Fe<sub>2</sub>(SO<sub>4</sub>)<sub>3</sub>, iodoisoquinolin-1-amine (**2aa**) reacted with acetophenone (**1a**) providing the desired product **3a** in 32% yield (b). Subsequently, replacing acetophenone (**1a**) with  $\alpha$ -iodoacetophenone (**1aa**), the target product **3a** was obtained in 54% yield. The above reactions effect were similar to that of with the additional of Fe<sub>2</sub>(SO<sub>4</sub>)<sub>3</sub>. Based on these supplementary experiments and literature review,<sup>[5]</sup> we speculate that

$\text{Fe}_2(\text{SO}_4)_3$  may act as a Lewis acid to activate the carbonyl group of phenylglyoxal (**1ab**) and promote the cyclization process to form intermediate **A**.

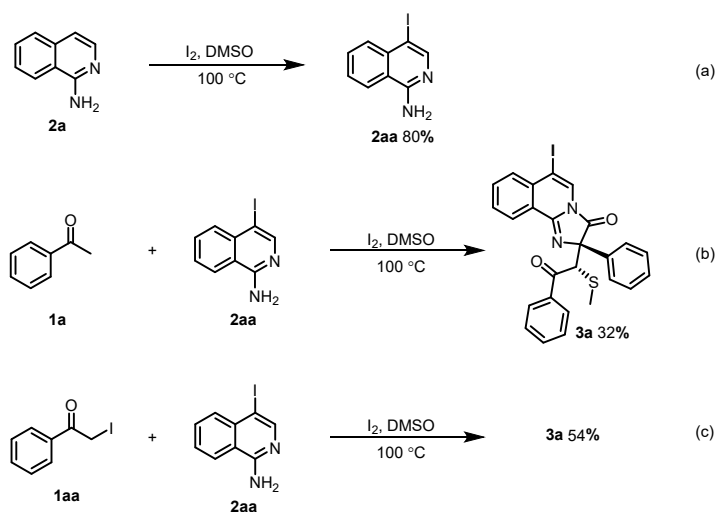

#### 4.4 Discuss the stereoselectivity of the two chiral centers

Through our unremitting efforts, we were fortunate to obtain the NMR spectra and confirm the molecular structure of the diastereoisomer **3s'** by X-ray crystallography. For other compounds, it's difficult to obtain their diastereoisomers. Through TLC analysis, we found that the diastereoisomers have lower polarity than the target product, and the separation between the two is good, the content ratio of the target product and its enantiomers is about 4:1. Unfortunately, our analytical technology is limited, we can only know from the experimental results that the energy of the target product is lower than its diastereoisomer, and it may has spatial advantages, which leads to the target product becoming the main product. By further analyzing the atomic distance between the single crystal structures of the two products, we found that the spatial distance between the two oxygen atoms in the target product (3.295 Å) was slightly larger than the diastereoisomer (3.279 Å), the spatial distance between the sulfur atom and the adjacent nitrogen atom in the target product (4.222 Å) was much larger than the diastereoisomer (3.172 Å). These were consistent with our experimental results, so this may be an important reason why the target product was the dominant structure.

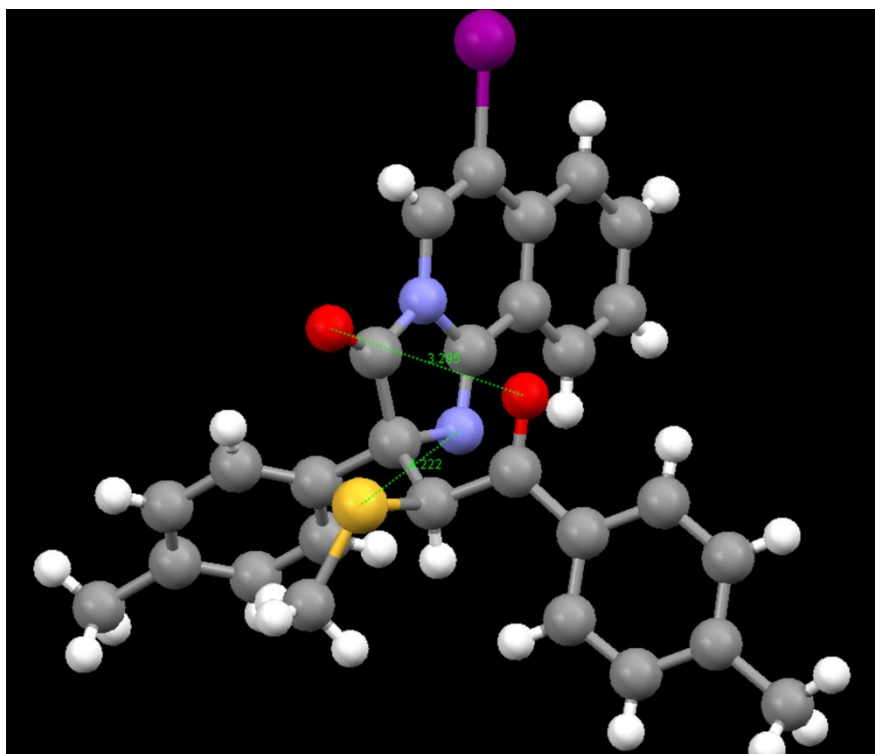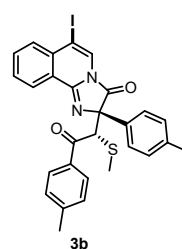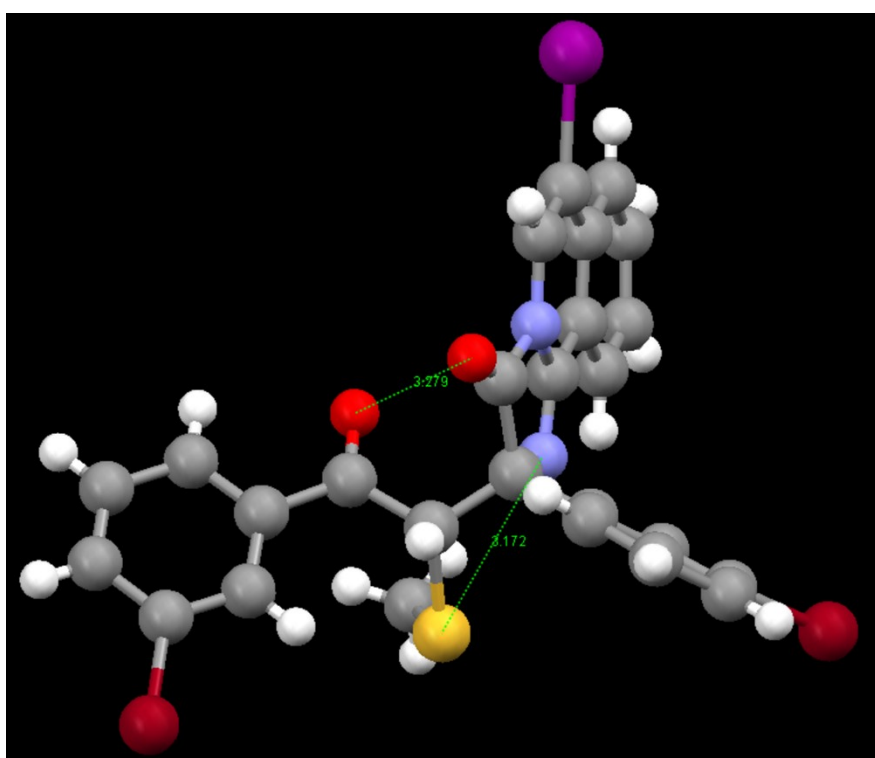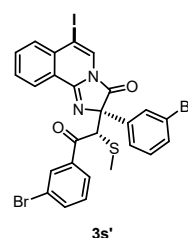

#### 4.5 Studies of cross reaction

We conducted the following three sets of cross reactions. All the products were successfully identified by LC-MS analysis of the crude reaction extract, including the crossed products.

We first investigated the cross reaction using **1a** (0.5 mmol), **1o** (0.5 mmol) and **2a** (0.5 mmol)

under the standard conditions.

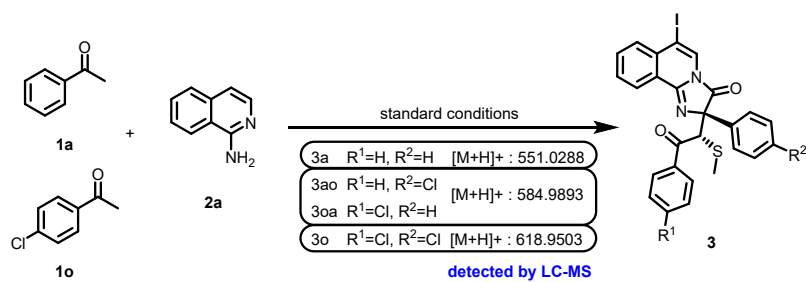

The LC-MS Spectra is listed below:

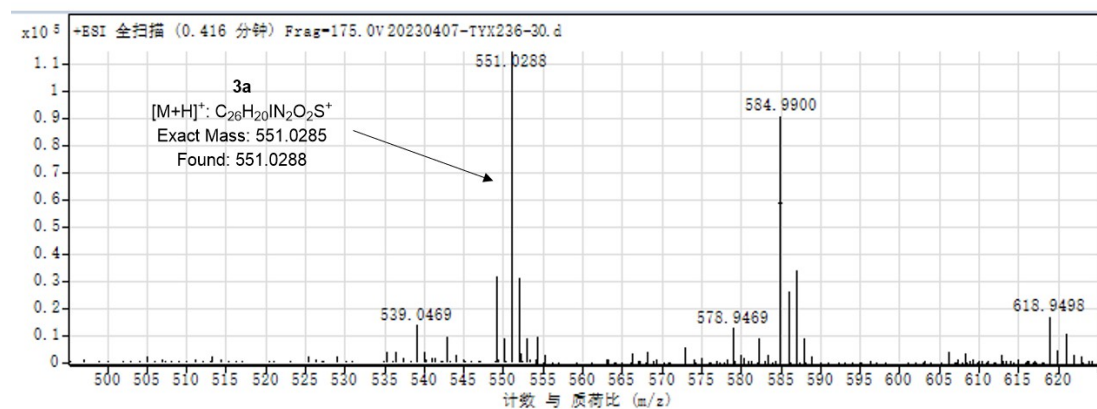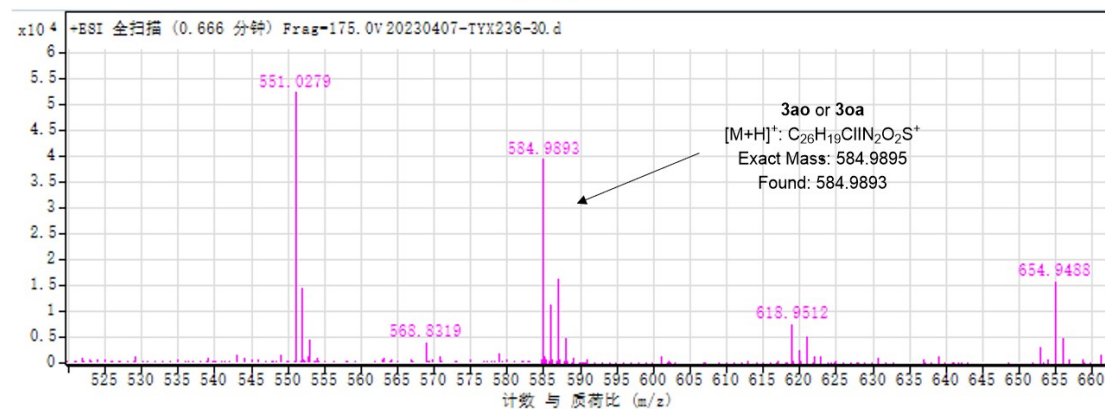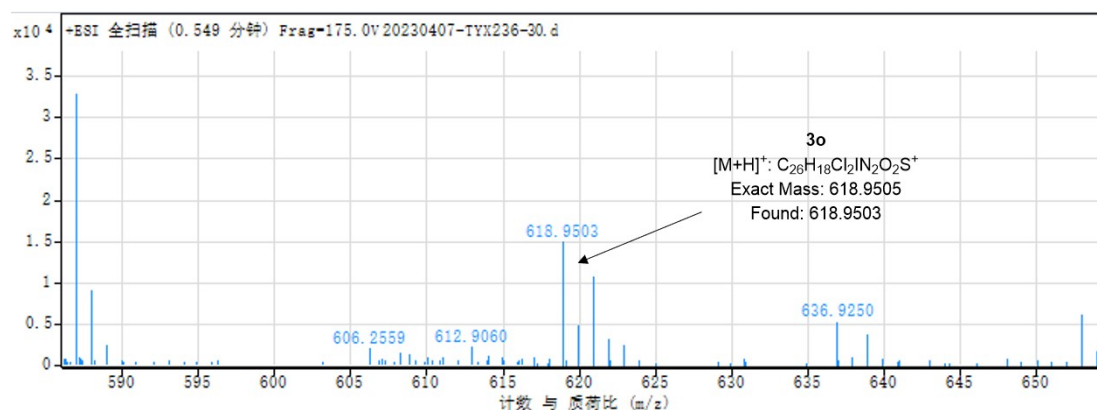

Then we investigated the cross reaction using **1a** (0.5 mmol), **1y** (0.5 mmol) and **2a** (0.5 mmol) under the standard conditions.



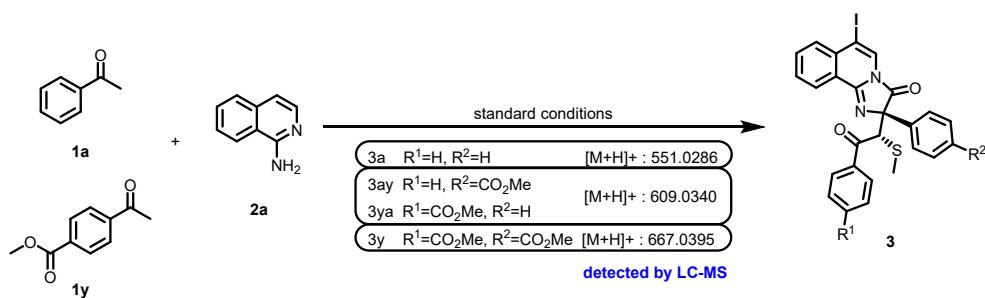

The LC-MS Spectra is listed below:

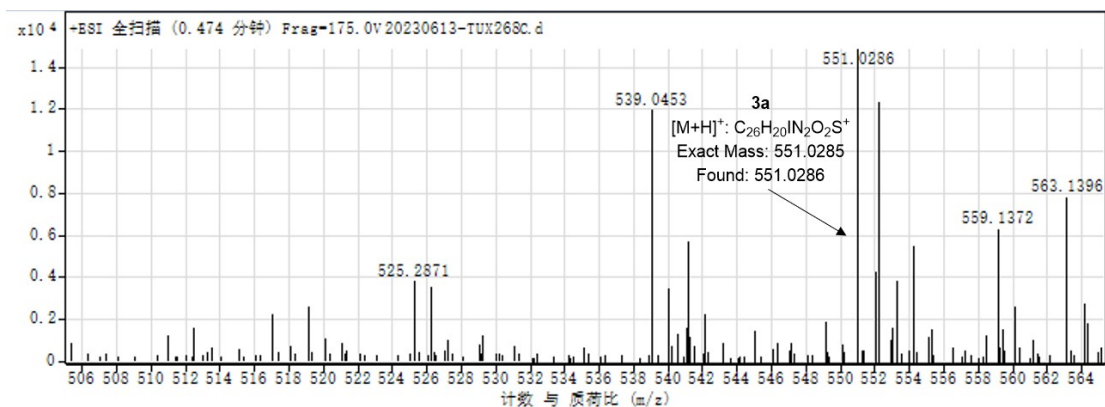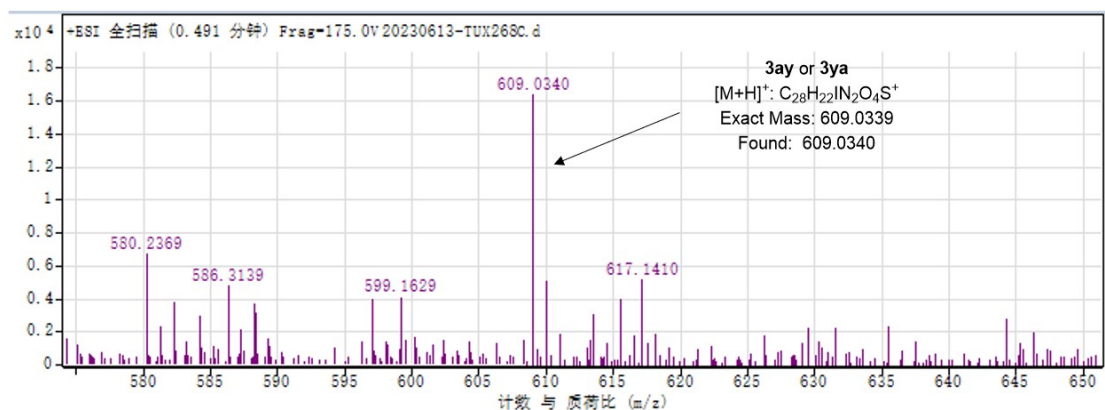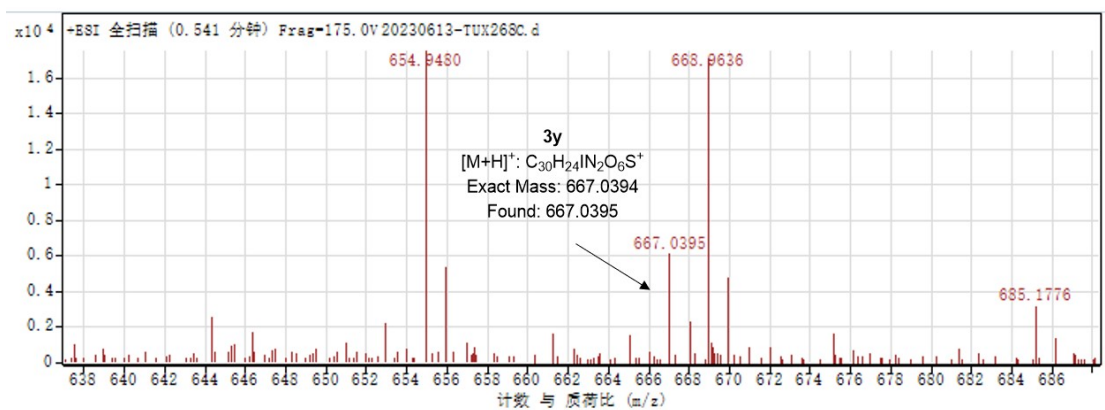

Next we investigated the cross reaction using **1a** (0.5 mmol), **1ad** (0.5 mmol) and **2a** (0.5 mmol) under the standard conditions.

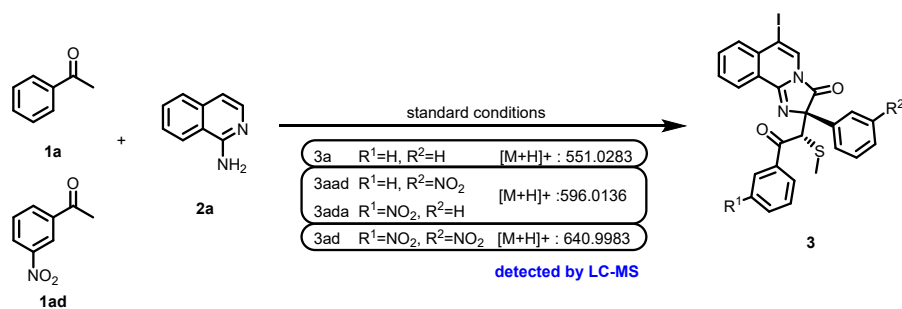

The LC-MS Spectra is listed below:

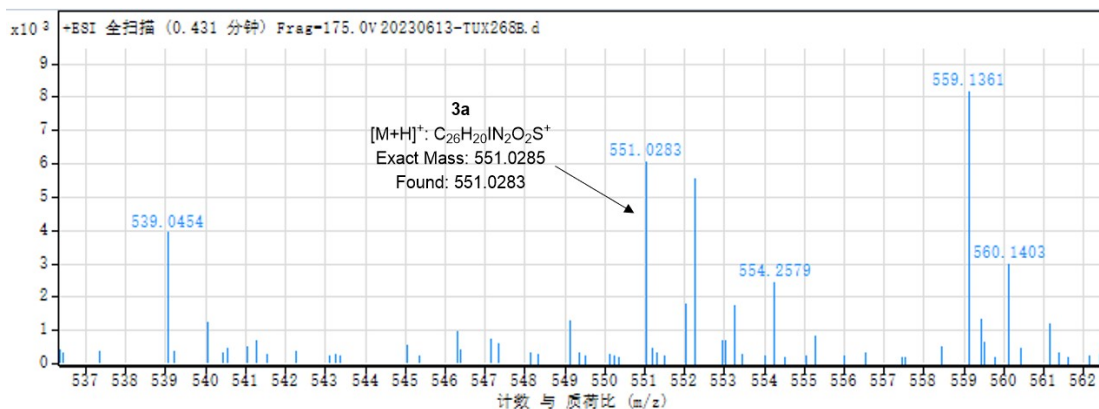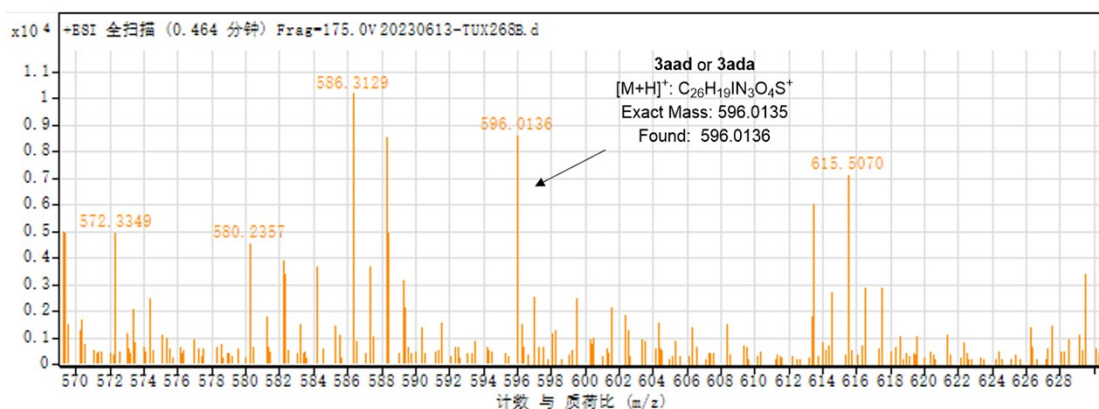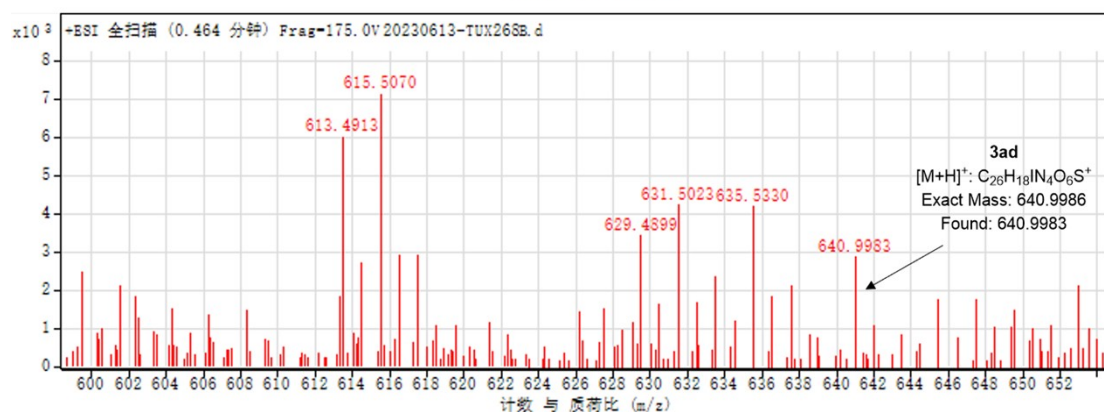

## References

- [1] Zhuang, S. Y.; Tang, Y. X.; Chen, X. L.; Wu, Y. D.; Wu, A. X. I<sub>2</sub>-DMSO Mediated Oxidative Amidation of Methyl Ketones with Anthranils for the Synthesis of  $\alpha$ -ketoamides. *Org. Biomol. Chem.* **2021**, *19*, 4258-4262.

- [2] Wang, L. S.; Zhou, Y.; Lei, S. G.; Yu, X. X.; Huang, C.; Wu, Y. D.; Wu, A. X. Iodine-Mediated Multicomponent Cascade Cyclization and Sulfenylation/Selenation: Synthesis of Imidazo[2,1-*a*]isoquinoline Derivatives. *Org. Lett.* **2022**, *24*, 4449-4453.
- [3] Garabatos-Perera, J. R.; Rotstein, B. H.; Thompson, A. Comparison of Benzene, Nitrobenzene, and Dinitrobenzene 2-Arylsulfonylpyrroles. *J. Org. Chem.* **2007**, *72*, 7382-7385.
- [4] Santosh, K. Pagire; Naoya, Kumagai; Masakatsu, Shibasaki Highly Enantio- and Diastereoselective Synthesis of 1,2,3-Trisubstituted Cyclopropanes from  $\alpha,\beta$ -Unsaturated Amides and Stabilized Sulfur Ylides Catalyzed by a Chiral Copper(I) Complex. *ACS Catal.* **2021**, *11*, 11597-11606.
- [5] (a) Zhao, P.; Yu, X. X.; Zhou, Y.; Huang, C.; Wu, Y. D.; Zhu, Y. P.; Wu, A. X. Arylacetylenes as Two-carbon Synthons: Synthesis of Eight-membered Rings via C $\equiv$ C Bond Cleavage. *Chem. Commun.* **2020**, *56*, 12554-12557; (b) Yu, X. X.; Zhao, P.; Zhou, Y.; Huang, C.; Wang, L. S.; Wu, Y. D.; Wu, A. X. Employing Arylacetylene as a Diene Precursor and Dienophile: Synthesis of Quinoline via the Povarov Reaction. *J. Org. Chem.* **2021**, *86*, 8381-8388; (c) Xu, C.; Yin, G.; Jia, F. C.; Wu, Y. D.; Wu, A. X. Merging Annulation with Ring Deconstruction: Synthesis of (*E*)-3-(2-Acyl-1*H*-benzo[*d*]imidazol-4-yl)acrylaldehyde Derivatives via I<sub>2</sub>/FeCl<sub>3</sub>-Promoted Dual C(sp<sup>3</sup>)-H Amination/C-N Bond Cleavage. *Org. Lett.* **2021**, *23*, 2559-2564.

## 5. The crystallographic data

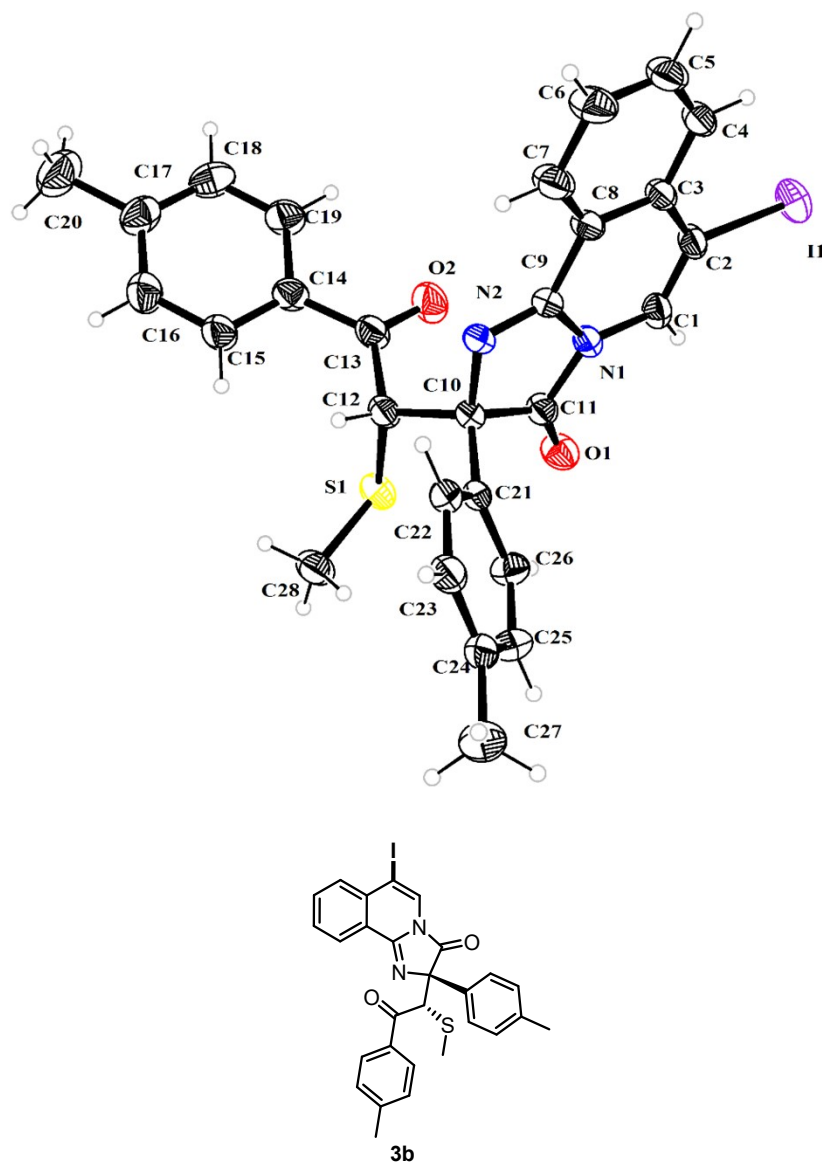

**Figure S1.** X-ray crystal structure of **3b** ORTEP (30%) drawing

Crystal Data for Compound **3b**: CCDC 2127420 contains the supplementary crystallographic data for this paper. These data can be obtained free of charge from The Cambridge Crystallographic.

Sample preparation: In a 10 mL glass bottle, 15 mg of pure **3b** was completely dissolved in the mixed solvent of 3 mL  $\text{CHCl}_3$ , and then 2 mL of n-hexane was added slowly. After a week of solvent evaporation, some yellow transparent crystals were obtained. The crystals were mounted on a glass fiber for diffraction experiments. Intensity data were collected on a Bruker SMART APEX CCD diffractometer with Mo  $K\alpha$  radiation (0.71073 Å) at room temperature.

Bond precision: C-C = 0.0048 Å                      Wavelength=0.71073

Cell:                      a=13.900(5)              b=11.046(4)              c=17.684(7)  
                                          alpha=90              beta=109.022(6)              gamma=90

Temperature:              296 K

|                        | Calculated        | Reported          |
|------------------------|-------------------|-------------------|
| Volume                 | 2566.9(17)        | 2567.0(17)        |
| Space group            | P 21/n            | P 1 21/n 1        |
| Hall group             | -P 2yn            | -P 2yn            |
| Moiety formula         | C28 H23 I N2 O2 S | C28 H23 I N2 O2 S |
| Sum formula            | C28 H23 I N2 O2 S | C28 H23 I N2 O2 S |
| Mr                     | 578.44            | 578.44            |
| Dx, g cm <sup>-3</sup> | 1.497             | 1.497             |
| Z                      | 4                 | 4                 |
| Mu (mm <sup>-1</sup> ) | 1.356             | 1.356             |
| F000                   | 1160.0            | 1160.0            |
| F000'                  | 1158.99           |                   |
| h, k, lmax             | 19, 15, 24        | 19, 15, 24        |
| Nref                   | 7069              | 7004              |
| Tmin, Tmax             | 0.729, 0.873      | 0.561, 0.746      |
| Tmin'                  | 0.659             |                   |

Correction method= # Reported T Limits: Tmin=0.561 Tmax=0.746  
 AbsCorr = MULTI-SCAN

Data completeness= 0.991                      Theta(max)= 29.380

R(reflections)= 0.0436( 4808)                      wR2(reflections)=  
 0.1375( 7004)

S = 1.035                      Npar= 330

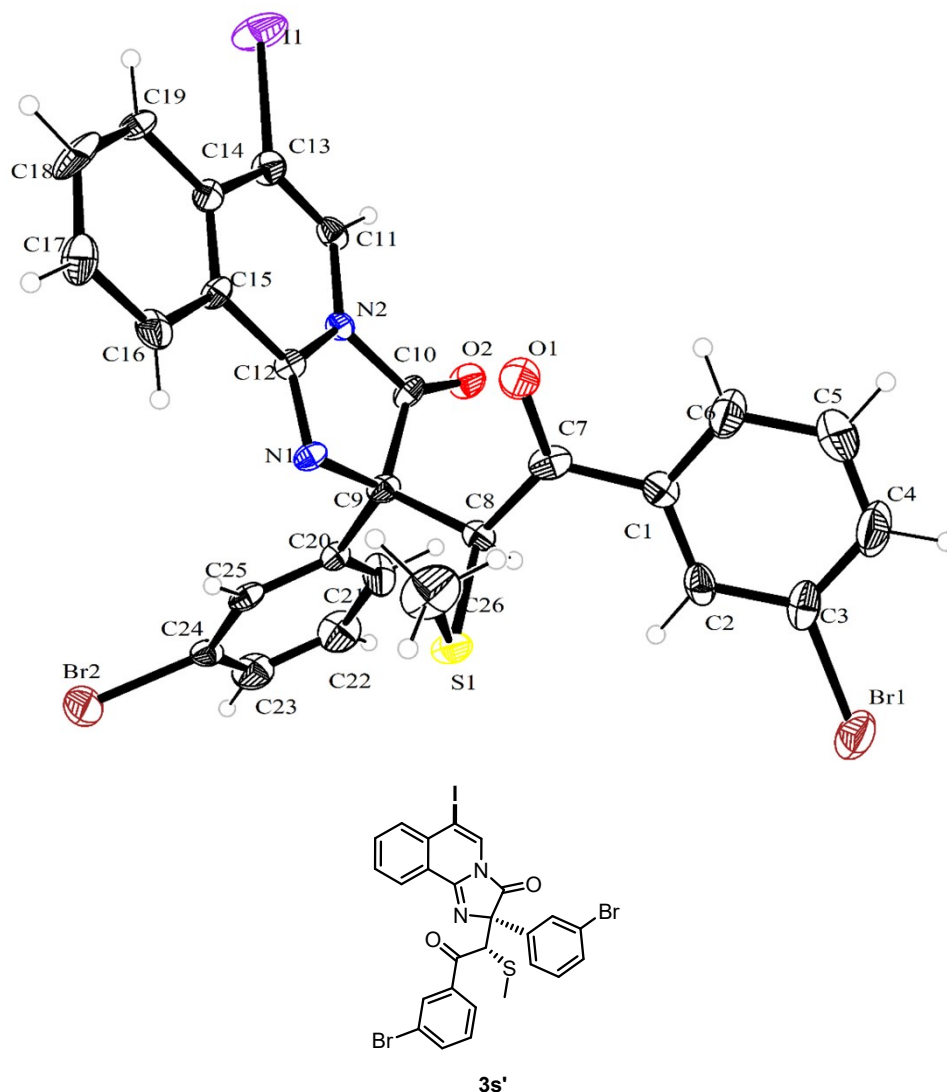

**Figure S1.** X-ray crystal structure of **3s'** ORTEP (30%) drawing

Crystal Data for Compound **3s'**: CCDC 2270637 contains the supplementary crystallographic data for this paper. These data can be obtained free of charge from The Cambridge Crystallographic.

Sample preparation: In a 10 mL glass bottle, 15 mg of pure **3s'** was completely dissolved in the mixed solvent of 3 mL  $\text{CHCl}_3$ , and then 2 mL of n-hexane was added slowly. After a week of solvent evaporation, some yellow transparent crystals were obtained. The crystals were mounted on a glass fiber for diffraction experiments. Intensity data were collected on a Bruker SMART APEX CCD diffractometer with Mo  $K\alpha$  radiation (0.71073 Å) at room temperature.

Bond precision: C-C = 0.0201 A Wavelength=0.71073  
 Cell: a=9.396(7) b=12.162(10) c=14.231(10)  
 alpha=110.606(11) beta=105.796(10) gamma=91.123(10)  
 Temperature: 296 K

|                        | Calculated                        | Reported                          |
|------------------------|-----------------------------------|-----------------------------------|
| Volume                 | 1452.6(19)                        | 1452.5(19)                        |
| Space group            | P -1                              | P -1                              |
| Hall group             | -P 1                              | -P 1                              |
| Moiety formula         | C26 H17 Br2 I N2 O2 S, C H<br>C13 | C26 H17 Br2 I N2 O2 S, C H<br>C13 |
| Sum formula            | C27 H18 Br2 Cl3 I N2 O2 S         | C27 H18 Br2 Cl3 I N2 O2 S         |
| Mr                     | 827.54                            | 827.56                            |
| Dx, g cm <sup>-3</sup> | 1.892                             | 1.892                             |
| Z                      | 2                                 | 2                                 |
| Mu (mm <sup>-1</sup> ) | 4.230                             | 4.230                             |
| F000                   | 800.0                             | 800.0                             |
| F000'                  | 799.32                            |                                   |
| h, k, lmax             | 11, 14, 16                        | 11, 14, 16                        |
| Nref                   | 5117                              | 4967                              |
| Tmin, Tmax             | 0.608, 0.655                      | 0.229, 0.746                      |
| Tmin'                  | 0.596                             |                                   |

Correction method= # Reported T Limits: Tmin=0.229 Tmax=0.746  
 AbsCorr = MULTI-SCAN

Data completeness= 0.971 Theta(max)= 25.000

R(reflections)= 0.0959( 2566) wR2(reflections)=  
 0.2855( 4967)  
 S = 0.967 Npar= 363

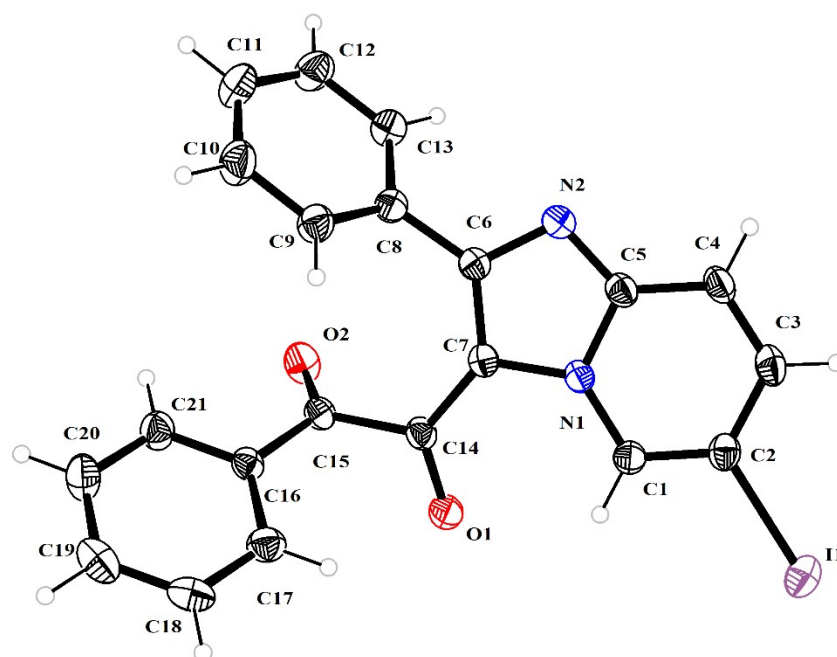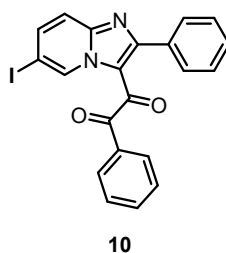

**Figure S1.** X-ray crystal structure of **10** ORTEP (30%) drawing

Crystal Data for Compound **10**: CCDC 2270636 contains the supplementary crystallographic data for this paper. These data can be obtained free of charge from The Cambridge Crystallographic.

Sample preparation: In a 10 mL glass bottle, 15 mg of pure **10** was completely dissolved in the mixed solvent of 3 mL  $\text{CHCl}_3$ , and then 2 mL of n-hexane was added slowly. After a week of solvent evaporation, some yellow transparent crystals were obtained. The crystals were mounted on a glass fiber for diffraction experiments. Intensity data were collected on a Bruker SMART APEX CCD diffractometer with  $\text{Mo K}\alpha$  radiation (0.71073 Å) at room temperature.





## 6. Spectroscopic data

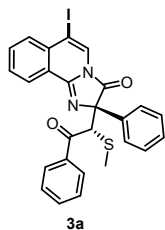

### **(R)-6-Iodo-2-((S)-1-(methylthio)-2-oxo-2-phenylethyl)-2-phenylimidazo[2,1-a]isoquinolin-3(2H)-one (3a)**

Purification by column chromatography on silica gel using petroleum ether/ethyl acetate (15:1 v/v) as eluent afforded **3a** (176.0 mg, yield 64%) as yellow solid ( $R_f = 0.3$ ); m.p. 132-134 °C;  $^1\text{H NMR}$  (400 MHz,  $\text{CDCl}_3$ )  $\delta$  8.31 (d,  $J = 7.6$  Hz, 1H), 7.99–7.92 (m, 4H), 7.82 (s, 1H), 7.63 (d,  $J = 3.6$  Hz, 2H), 7.55 (t,  $J = 7.2$  Hz, 1H), 7.45–7.35 (m, 5H), 7.34–7.29 (m, 1H), 5.02 (s, 1H), 1.93 (s, 3H);  $^{13}\text{C NMR}$  (100 MHz,  $\text{CDCl}_3$ )  $\delta$  192.8, 177.5, 155.0, 135.9, 135.6, 134.6, 133.5, 133.4, 131.7, 129.0, 128.6, 128.5, 128.4, 128.3, 127.5, 127.2, 125.7, 123.4, 77.8, 76.1, 58.5, 16.1; HRMS (ESI)  $m/z$ :  $[\text{M}+\text{H}]^+$  Calcd for  $\text{C}_{26}\text{H}_{20}\text{IN}_2\text{O}_2\text{S}^+$  551.0285; Found 551.0287.

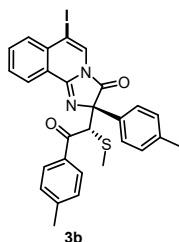

### **(R)-6-Iodo-2-((S)-1-(methylthio)-2-oxo-2-(p-tolyl)ethyl)-2-(p-tolyl)imidazo[2,1-a]isoquinolin-3(2H)-one (3b)**

Purification by column chromatography on silica gel using petroleum ether/ethyl acetate (15:1 v/v) as eluent afforded **3b** (176.3 mg yield 61%) as yellow solid ( $R_f = 0.28$ ); m.p. 168-170 °C;  $^1\text{H NMR}$  (400 MHz,  $\text{CDCl}_3$ )  $\delta$  8.28 (d,  $J = 7.6$  Hz, 1H), 7.85 (d,  $J = 8.0$  Hz, 4H), 7.80 (s, 1H), 7.59 (d,  $J = 3.6$  Hz, 2H), 7.43–7.37 (m, 1H), 7.23–7.15 (m, 4H), 5.00 (s, 1H), 2.37 (s, 3H), 2.32 (s, 3H), 1.94 (s, 3H);  $^{13}\text{C NMR}$  (100 MHz,  $\text{CDCl}_3$ )  $\delta$  192.5, 177.6, 154.8, 144.3, 138.1, 134.5, 133.4, 132.94, 132.92, 131.6, 129.3, 128.9, 128.6, 127.3, 127.2, 125.6, 123.4, 77.7, 76.0, 58.3, 21.6, 21.1, 16.0; HRMS (ESI)  $m/z$ :  $[\text{M}+\text{Na}]^+$  Calcd for  $\text{C}_{28}\text{H}_{24}\text{IN}_2\text{O}_2\text{S}^+$  579.0598; Found 579.0599.

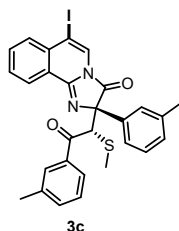

### **(R)-6-Iodo-2-((S)-1-(methylthio)-2-oxo-2-(m-tolyl)ethyl)-2-(m-tolyl)imidazo[2,1-a]isoquinolin-3(2H)-one (3c)**

Purification by column chromatography on silica gel using petroleum ether/ethyl acetate (30:1 v/v) as eluent afforded **3c** (167.6 mg, yield 58%) as yellow solid ( $R_f = 0.2$ ); m.p. 163-165 °C;  $^1\text{H NMR}$

(400 MHz, CDCl<sub>3</sub>)  $\delta$  8.30 (d,  $J$  = 7.6 Hz, 1H), 7.80 (s, 1H), 7.79–7.72 (m, 4H), 7.60 (d,  $J$  = 4.0 Hz, 2H), 7.45–7.39 (m, 1H), 7.36–7.24 (m, 3H), 7.12 (d,  $J$  = 7.6 Hz, 1H), 5.03 (s, 1H), 2.36 (s, 6H), 1.94 (s, 3H); <sup>13</sup>C NMR (100 MHz, CDCl<sub>3</sub>)  $\delta$  193.0, 177.5, 154.9, 138.4, 137.9, 135.8, 135.6, 134.6, 134.2, 133.4, 131.6, 129.1, 129.0, 128.9, 128.4, 128.1, 128.0, 127.2, 125.6, 124.5, 123.5, 77.8, 76.2, 58.3, 21.6, 21.3, 16.1; HRMS (ESI)  $m/z$ : [M+H]<sup>+</sup> Calcd for C<sub>28</sub>H<sub>24</sub>IN<sub>2</sub>O<sub>2</sub>S<sup>+</sup> 579.0598; Found 579.0600.

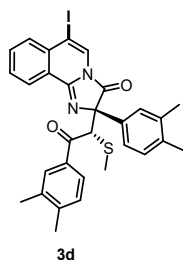

**(*R*)-2-(3,4-Dimethylphenyl)-2-((*S*)-2-(3,4-dimethylphenyl)-1-(methylthio)-2-oxoethyl)-6-iodoimidazo[2,1-*a*]isoquinolin-3(2*H*)-one (3d)**

Purification by column chromatography on silica gel using petroleum ether/ethyl acetate (20:1 v/v) as eluent afforded **3d** (172.7 mg, yield 57%) as yellow solid ( $R_f$  = 0.3); m.p. 113–115 °C; <sup>1</sup>H NMR (400 MHz, CDCl<sub>3</sub>)  $\delta$  8.26 (d,  $J$  = 7.6 Hz, 1H), 7.78 (s, 1H), 7.71 (s, 4H), 7.52 (s, 2H), 7.34 (s, 1H), 7.14 (d,  $J$  = 4.0 Hz, 2H), 5.05 (s, 1H), 2.27 (s, 3H), 2.23 (d,  $J$  = 2.8 Hz, 6H), 2.21 (s, 3H), 1.96 (s, 3H); <sup>13</sup>C NMR (100 MHz, CDCl<sub>3</sub>)  $\delta$  192.5, 177.5, 154.6, 142.9, 136.8, 136.6, 136.3, 134.3, 133.21, 133.18, 131.4, 129.7, 129.5, 129.4, 128.7, 128.4, 127.0, 126.1, 125.5, 124.8, 123.3, 77.6, 76.0, 58.0, 19.89, 19.86, 19.6, 19.3, 15.9; HRMS (ESI)  $m/z$ : [M+H]<sup>+</sup> Calcd for C<sub>30</sub>H<sub>28</sub>IN<sub>2</sub>O<sub>2</sub>S<sup>+</sup> 607.0911; Found 607.0912.

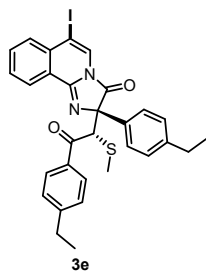

**(*R*)-2-(4-Ethylphenyl)-2-((*S*)-2-(4-ethylphenyl)-1-(methylthio)-2-oxoethyl)-6-iodoimidazo[2,1-*a*]isoquinolin-3(2*H*)-one (3e)**

Purification by column chromatography on silica gel using petroleum ether/ethyl acetate (20:1 v/v) as eluent afforded **3e** (166.7 mg, yield 55%) as yellow solid ( $R_f$  = 0.28); m.p. 173–175 °C; <sup>1</sup>H NMR (400 MHz, CDCl<sub>3</sub>)  $\delta$  8.29 (d,  $J$  = 6.8 Hz, 1H), 7.92–7.85 (m, 4H), 7.81 (s, 1H), 7.59 (d,  $J$  = 2.8 Hz, 2H), 7.44–7.38 (m, 1H), 7.25–7.18 (m, 4H), 5.01 (s, 1H), 2.71–2.58 (m, 4H), 1.94 (s, 3H), 1.25–1.17 (m, 6H); <sup>13</sup>C NMR (100 MHz, CDCl<sub>3</sub>)  $\delta$  192.5, 177.6, 154.8, 150.4, 144.4, 134.6, 133.4, 133.2, 131.6, 128.9, 128.7, 128.1, 127.7, 127.5, 127.2, 125.7, 123.5, 77.7, 76.0, 58.4, 28.9, 28.4, 16.0, 15.4, 15.1; HRMS (ESI)  $m/z$ : [M+H]<sup>+</sup> Calcd for C<sub>30</sub>H<sub>28</sub>IN<sub>2</sub>O<sub>2</sub>S<sup>+</sup> 607.0911; Found 607.0913.

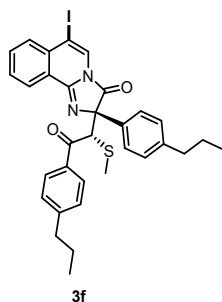

**(R)-6-Iodo-2-((S)-1-(methylthio)-2-oxo-2-(4-propylphenyl)ethyl)-2-(4-propylphenyl)imidazo[2,1-a]isoquinolin-3(2H)-one (3f)**

Purification by column chromatography on silica gel using petroleum ether/ethyl acetate (30:1 v/v) as eluent afforded **3f** (161.7 mg, yield 51%) as yellow solid ( $R_f = 0.29$ ); m.p. 188-190 °C;  $^1\text{H}$  NMR (400 MHz,  $\text{CDCl}_3$ )  $\delta$  8.28 (d,  $J = 6.8$  Hz, 1H), 7.87 (t,  $J = 7.2$  Hz, 4H), 7.81 (s, 1H), 7.60 (s, 2H), 7.41 (s, 1H), 7.24–7.15 (m, 4H), 5.00 (s, 1H), 2.63–2.53 (m, 4H), 1.93 (s, 3H), 1.68–1.55 (m, 4H), 0.95–0.87 (m, 6H);  $^{13}\text{C}$  NMR (100 MHz,  $\text{CDCl}_3$ )  $\delta$  192.6, 177.6, 154.8, 148.9, 142.9, 134.6, 133.4, 133.2, 131.6, 128.9, 128.7, 128.6, 128.3, 127.4, 127.2, 125.6, 123.5, 77.6, 76.0, 58.6, 38.0, 37.6, 24.4, 24.1, 16.1, 13.8; HRMS (ESI)  $m/z$ :  $[\text{M}+\text{H}]^+$  Calcd for  $\text{C}_{32}\text{H}_{32}\text{IN}_2\text{O}_2\text{S}^+$  635.1224; Found 635.1223.

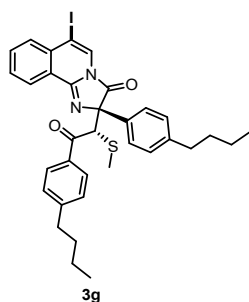

**(R)-2-(4-Butylphenyl)-2-((S)-2-(4-butylphenyl)-1-(methylthio)-2-oxoethyl)-6-iodoimidazo[2,1-a]isoquinolin-3(2H)-one (3g)**

Purification by column chromatography on silica gel using petroleum ether/ethyl acetate (50:1 v/v) as eluent afforded **3g** (155.6 mg, yield 47%) as yellow solid ( $R_f = 0.2$ ); m.p. 134-136 °C;  $^1\text{H}$  NMR (400 MHz,  $\text{CDCl}_3$ )  $\delta$  8.27 (d,  $J = 7.6$  Hz, 1H), 7.87 (t,  $J = 7.6$  Hz, 4H), 7.80 (s, 1H), 7.58 (d,  $J = 3.2$  Hz, 2H), 7.42–7.36 (m, 1H), 7.24–7.15 (m, 4H), 5.00 (s, 1H), 2.66–2.55 (m, 4H), 1.94 (s, 3H), 1.62–1.51 (m, 4H), 1.38–1.26 (m, 4H), 0.94–0.85 (m, 6H);  $^{13}\text{C}$  NMR (100 MHz,  $\text{CDCl}_3$ )  $\delta$  192.5, 177.6, 154.7, 149.2, 143.1, 134.5, 133.4, 133.1, 131.6, 128.9, 128.63, 128.60, 128.3, 127.4, 127.2, 125.6, 123.5, 77.6, 75.9, 58.5, 35.6, 35.2, 33.4, 33.1, 22.3, 22.2, 16.1, 13.89, 13.86; HRMS (ESI)  $m/z$ :  $[\text{M}+\text{H}]^+$  Calcd for  $\text{C}_{34}\text{H}_{36}\text{IN}_2\text{O}_2\text{S}^+$  663.1537; Found 663.1537.

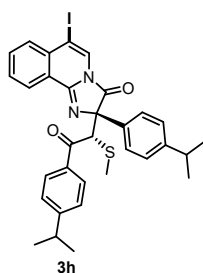

**(R)-6-Iodo-2-(4-isopropylphenyl)-2-((S)-2-(4-isopropylphenyl)-1-(methylthio)-2-oxoethyl)imidazo[2,1-a]isoquinolin-3(2H)-one (3h)**

Purification by column chromatography on silica gel using petroleum ether/ethyl acetate (30:1 v/v) as eluent afforded **3h** (171.2 mg, yield 54%) as yellow solid ( $R_f = 0.32$ ); m.p. 147-149 °C;  $^1\text{H NMR}$  (400 MHz,  $\text{CDCl}_3$ )  $\delta$  8.25 (d,  $J = 8.0$  Hz, 1H), 7.93 (d,  $J = 8.0$  Hz, 2H), 7.89 (d,  $J = 8.0$  Hz, 2H), 7.78 (s, 1H), 7.51 (d,  $J = 5.6$  Hz, 2H), 7.36–7.31 (m, 1H), 7.27–7.22 (m, 4H), 5.03 (s, 1H), 2.94–2.83 (m, 2H), 1.95 (s, 3H), 1.22 (s, 6H), 1.20 (s, 6H);  $^{13}\text{C NMR}$  (100 MHz,  $\text{CDCl}_3$ )  $\delta$  192.3, 177.5, 154.8, 154.6, 148.9, 134.4, 133.3, 133.2, 133.1, 131.4, 128.8, 128.7, 127.5, 127.1, 126.6, 126.1, 125.5, 123.3, 77.5, 75.8, 58.3, 34.1, 33.6, 23.8, 23.49, 23.47, 15.9; HRMS (ESI)  $m/z$ :  $[\text{M}+\text{H}]^+$  Calcd for  $\text{C}_{32}\text{H}_{32}\text{IN}_2\text{O}_2\text{S}^+$  635.1224; Found 635.1225.

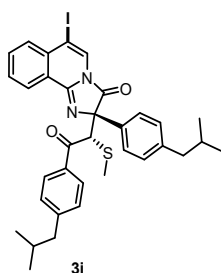

**(R)-6-Iodo-2-(4-isobutylphenyl)-2-((S)-2-(4-isobutylphenyl)-1-(methylthio)-2-oxoethyl)imidazo[2,1-a]isoquinolin-3(2H)-one (3i)**

Purification by column chromatography on silica gel using petroleum ether/ethyl acetate (50:1 v/v) as eluent afforded **3i** (172.1 mg, yield 52%) as yellow solid ( $R_f = 0.3$ ); m.p. 181-183 °C;  $^1\text{H NMR}$  (400 MHz,  $\text{CDCl}_3$ )  $\delta$  8.28 (d,  $J = 7.6$  Hz, 1H), 7.91–7.78 (m, 4H), 7.81 (s, 1H), 7.57 (d,  $J = 2.8$  Hz, 2H), 7.44–7.36 (m, 1H), 7.20–7.10 (m, 4H), 4.99 (s, 1H), 2.49 (d,  $J = 7.2$  Hz, 2H), 2.44 (d,  $J = 7.2$  Hz, 2H), 1.93 (s, 3H), 1.90–1.79 (m, 2H), 0.91–0.83 (m, 12H);  $^{13}\text{C NMR}$  (100 MHz,  $\text{CDCl}_3$ )  $\delta$  192.7, 177.5, 154.8, 147.9, 141.9, 134.6, 133.4, 133.2, 133.1, 131.6, 129.3, 128.94, 128.89, 128.5, 127.3, 127.2, 125.6, 123.4, 77.7, 75.9, 58.7, 45.3, 45.0, 30.1, 30.0, 22.3, 16.2; HRMS (ESI)  $m/z$ :  $[\text{M}+\text{H}]^+$  Calcd for  $\text{C}_{34}\text{H}_{36}\text{IN}_2\text{O}_2\text{S}^+$  663.1537; Found 663.1538.

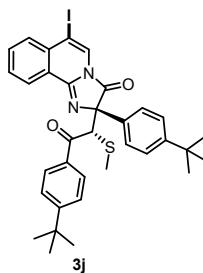

**(R)-2-(4-(*tert*-Butyl)phenyl)-2-((S)-2-(4-(*tert*-butyl)phenyl)-1-(methylthio)-2-oxoethyl)-6-iodoimidazo[2,1-*a*]isoquinolin-3(2*H*)-one (3j)**

Purification by column chromatography on silica gel using petroleum ether/ethyl acetate (50:1 v/v) as eluent afforded **3j** (158.9 mg, yield 48%) as yellow solid ( $R_f = 0.30$ ); m.p. 200-202 °C;  $^1\text{H NMR}$  (400 MHz,  $\text{CDCl}_3$ )  $\delta$  8.28 (d,  $J = 6.8$  Hz, 1H), 7.94–7.88 (m, 4H), 7.80 (s, 1H), 7.59 (d,  $J = 2.8$  Hz, 2H), 7.45–7.37 (m, 5H), 5.03 (s, 1H), 1.95 (s, 3H), 1.30 (d,  $J = 6.8$  Hz, 18H);  $^{13}\text{C NMR}$  (100 MHz,  $\text{CDCl}_3$ )  $\delta$  192.4, 177.5, 157.1, 154.8, 151.3, 134.6, 133.4, 132.8, 131.6, 128.9, 128.5, 127.3, 127.2, 125.7, 125.5, 125.1, 123.4, 77.6, 75.9, 58.3, 35.1, 34.5, 31.2, 31.0, 16.0; HRMS (ESI)  $m/z$ :  $[\text{M}+\text{H}]^+$  Calcd for  $\text{C}_{34}\text{H}_{36}\text{IN}_2\text{O}_2\text{S}^+$  663.1537; Found 663.1537.

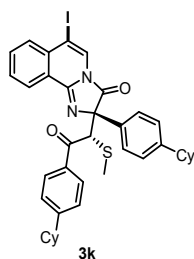

**(R)-2-(4-Cyclohexylphenyl)-2-((S)-2-(4-cyclohexylphenyl)-1-(methylthio)-2-oxoethyl)-6-iodoimidazo[2,1-*a*]isoquinolin-3(2*H*)-one (3k)**

Purification by column chromatography on silica gel using petroleum ether/ethyl acetate (30:1 v/v) as eluent afforded **3k** (224.9 mg, yield 63%) as yellow solid ( $R_f = 0.28$ ); m.p. 183-185 °C;  $^1\text{H NMR}$  (400 MHz,  $\text{CDCl}_3$ )  $\delta$  8.25 (d,  $J = 8.0$  Hz, 1H), 7.92–7.84 (m, 4H), 7.78 (s, 1H), 7.56–7.50 (m, 2H), 7.38–7.32 (m, 1H), 7.25–7.18 (m, 4H), 5.01 (s, 1H), 2.56–2.42 (m, 2H), 1.93 (s, 3H), 1.81 (s, 8H), 1.75–1.68 (m, 2H), 1.42–1.29 (m, 8H), 1.27–1.18 (m, 2H);  $^{13}\text{C NMR}$  (100 MHz,  $\text{CDCl}_3$ )  $\delta$  192.4, 177.5, 154.6, 154.0, 148.1, 134.4, 133.3, 133.14, 133.12, 131.5, 128.8, 128.7, 127.5, 127.1, 127.0, 126.6, 125.5, 123.4, 77.5, 75.8, 58.4, 44.5, 44.0, 34.23, 34.21, 33.90, 33.88, 26.7, 26.6, 26.0, 25.9, 16.0; HRMS (ESI)  $m/z$ :  $[\text{M}+\text{H}]^+$  Calcd for  $\text{C}_{38}\text{H}_{40}\text{IN}_2\text{O}_2\text{S}^+$  715.1850; Found 715.1847.

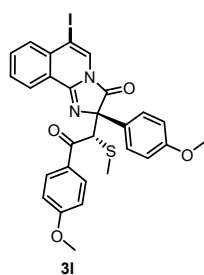

**(R)-6-Iodo-2-(4-methoxyphenyl)-2-((S)-2-(4-methoxyphenyl)-1-(methylthio)-2-oxoethyl)imidazo[2,1-*a*]isoquinolin-3(2*H*)-one (3l)**

Purification by column chromatography on silica gel using petroleum ether/ethyl acetate (5:1 v/v) as eluent afforded **3l** (137.3 mg, yield 45%) as yellow solid ( $R_f = 0.30$ ); m.p. 144-146 °C;  $^1\text{H NMR}$  (400 MHz,  $\text{DMSO}-d_6$ )  $\delta$  8.08 (d,  $J = 7.6$  Hz, 1H), 8.00 (d,  $J = 8.0$  Hz, 2H), 7.84 (s, 3H), 7.70 (t,  $J = 7.2$  Hz, 1H), 7.58 (d,  $J = 8.0$  Hz, 1H), 7.48 (t,  $J = 7.2$  Hz, 1H), 6.98 (t,  $J = 6.8$  Hz, 4H), 5.21 (s, 1H), 3.81 (s, 3H), 3.74 (s, 3H), 1.83 (s, 3H);  $^{13}\text{C NMR}$  (100 MHz,  $\text{DMSO}-d_6$ )  $\delta$  192.0, 177.0, 163.6, 159.1, 153.9, 134.2, 134.1, 131.4, 131.2, 129.5, 129.0, 127.5, 127.4, 126.9, 125.0, 122.6, 114.0,

113.4, 78.1, 75.0, 58.1, 55.6, 55.1, 16.0; HRMS (ESI)  $m/z$ :  $[M+H]^+$  Calcd for  $C_{28}H_{24}IN_2O_4S^+$  611.0496; Found 611.0494.

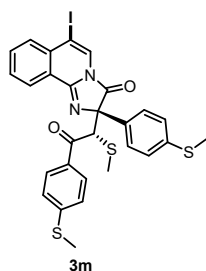

**(R)-6-Iodo-2-((S)-1-(methylthio)-2-(4-(methylthio)phenyl)-2-oxoethyl)-2-(4-(methylthio)phenyl)imidazo[2,1-a]isoquinolin-3(2H)-one (3m)**

Purification by column chromatography on silica gel using petroleum ether/ethyl acetate (10:1 v/v) as eluent afforded **3m** (205.4 mg, yield 64%) as yellow solid ( $R_f$  = 0.28); m.p. 148-150 °C;  $^1H$  NMR (400 MHz,  $CDCl_3$ )  $\delta$  8.28 (d,  $J$  = 8.0 Hz, 1H), 7.90 (d,  $J$  = 8.4 Hz, 2H), 7.85 (d,  $J$  = 8.4 Hz, 2H), 7.79 (s, 1H), 7.58 (d,  $J$  = 4.0 Hz, 2H), 7.44–7.37 (m, 1H), 7.25–7.16 (m, 4H), 4.95 (s, 1H), 2.45 (s, 3H), 2.44 (s, 3H), 1.95 (s, 3H);  $^{13}C$  NMR (100 MHz,  $CDCl_3$ )  $\delta$  191.7, 177.3, 154.9, 146.5, 139.0, 134.5, 133.5, 132.4, 131.6, 131.3, 129.0, 128.9, 127.9, 127.0, 125.8, 125.6, 124.7, 123.2, 77.9, 75.6, 58.2, 16.0, 15.4, 14.6; HRMS (ESI)  $m/z$ :  $[M+H]^+$  Calcd for  $C_{28}H_{24}IN_2O_2S_3^+$  643.0039; Found 643.0040.

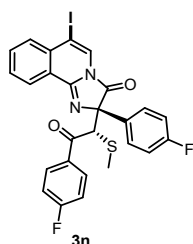

**(R)-2-(4-Fluorophenyl)-2-((S)-2-(4-fluorophenyl)-1-(methylthio)-2-oxoethyl)-6-iodoimidazo[2,1-a]isoquinolin-3(2H)-one (3n)**

Purification by column chromatography on silica gel using petroleum ether/ethyl acetate (20:1 v/v) as eluent afforded **3n** (164.1 mg, yield 56%) as yellow solid ( $R_f$  = 0.3); m.p. 146-148 °C;  $^1H$  NMR (400 MHz,  $CDCl_3$ )  $\delta$  8.29 (d,  $J$  = 8.0 Hz, 1H), 8.02–7.94 (m, 4H), 7.80 (s, 1H), 7.62 (d,  $J$  = 3.6 Hz, 2H), 7.48–7.41 (m, 1H), 7.12–7.02 (m, 4H), 4.89 (s, 1H), 1.96 (s, 3H);  $^{13}C$  NMR (100 MHz,  $CDCl_3$ )  $\delta$  191.3, 177.3, 167.1, 164.6, 163.9, 161.5, 155.2, 134.6, 133.7, 131.74, 131.70, 131.67, 131.6, 131.5, 131.3, 131.2, 129.44, 129.36, 129.1, 127.0, 125.6, 123.2, 115.8, 115.6, 115.2, 115.0, 78.0, 75.3, 58.6, 16.0;  $^{19}F$  NMR (376 MHz,  $CDCl_3$ )  $\delta$  -104.03, -113.19; HRMS (ESI)  $m/z$ :  $[M+H]^+$  Calcd for  $C_{26}H_{18}F_2IN_2O_2S^+$  587.0096; Found 587.0098.

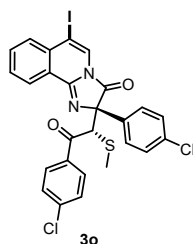

**(*R*)-2-(4-Chlorophenyl)-2-((*S*)-2-(4-chlorophenyl)-1-(methylthio)-2-oxoethyl)-6-iodoimidazo[2,1-*a*]isoquinolin-3(*2H*)-one (3o)**

Purification by column chromatography on silica gel using petroleum ether/ethyl acetate (20:1 v/v) as eluent afforded **3o** (194.7 mg, yield 63%) as yellow solid (Rf = 0.3); m.p. 158-160 °C; <sup>1</sup>H NMR (400 MHz, CDCl<sub>3</sub>) δ 8.30 (d, *J* = 8.0 Hz, 1H), 7.94–7.85 (m, 4H), 7.79 (s, 1H), 7.63 (d, *J* = 4.0 Hz, 2H), 7.49–7.42 (m, 1H), 7.39 (d, *J* = 8.4 Hz, 2H), 7.33 (d, *J* = 8.4 Hz, 2H), 4.88 (s, 1H), 1.96 (s, 3H); <sup>13</sup>C NMR (100 MHz, CDCl<sub>3</sub>) δ 191.4, 177.1, 155.4, 139.9, 134.63, 134.55, 134.3, 133.8, 133.7, 131.8, 130.0, 129.2, 128.95, 128.91, 128.4, 126.9, 125.6, 123.1, 78.2, 75.4, 58.5, 16.0; HRMS (ESI) m/z: [M+H]<sup>+</sup> Calcd for C<sub>26</sub>H<sub>18</sub>Cl<sub>2</sub>IN<sub>2</sub>O<sub>2</sub>S<sup>+</sup> 618.9505; Found 618.9507.

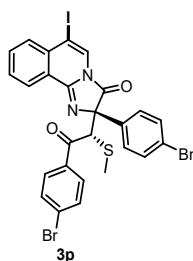

**(*R*)-2-(4-Bromophenyl)-2-((*S*)-2-(4-bromophenyl)-1-(methylthio)-2-oxoethyl)-6-iodoimidazo[2,1-*a*]isoquinolin-3(*2H*)-one (3p)**

Purification by column chromatography on silica gel using petroleum ether/ethyl acetate (20:1 v/v) as eluent afforded **3p** (229.5 mg, yield 65%) as yellow solid (Rf = 0.3); m.p. 165-167 °C; <sup>1</sup>H NMR (400 MHz, CDCl<sub>3</sub>) δ 8.29 (d, *J* = 7.6 Hz, 1H), 7.86 (d, *J* = 8.4 Hz, 2H), 7.80 (d, *J* = 8.8 Hz, 3H), 7.62 (s, 2H), 7.55 (d, *J* = 8.4 Hz, 2H), 7.51–7.42 (m, 3H), 4.87 (s, 1H), 1.96 (s, 3H); <sup>13</sup>C NMR (100 MHz, CDCl<sub>3</sub>) δ 191.6, 177.1, 155.4, 134.9, 134.6, 134.0, 133.8, 131.9, 131.8, 131.3, 130.0, 129.3, 129.2, 128.7, 126.9, 125.6, 123.1, 122.8, 78.2, 75.4, 58.4, 15.9; HRMS (ESI) m/z: [M+H]<sup>+</sup> Calcd for C<sub>26</sub>H<sub>18</sub>Br<sub>2</sub>IN<sub>2</sub>O<sub>2</sub>S<sup>+</sup> 706.8495; Found 706.8494.

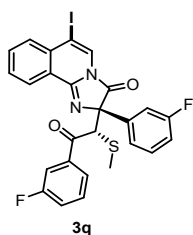

**(*R*)-2-(3-Fluorophenyl)-2-((*S*)-2-(3-fluorophenyl)-1-(methylthio)-2-oxoethyl)-6-iodoimidazo[2,1-*a*]isoquinolin-3(*2H*)-one (3q)**

Purification by column chromatography on silica gel using petroleum ether/ethyl acetate (20:1 v/v) as eluent afforded **3q** (167.0 mg, yield 57%) as yellow solid (Rf = 0.3); m.p. 145-147 °C; <sup>1</sup>H NMR (400 MHz, CDCl<sub>3</sub>) δ 8.32 (d, *J* = 7.6 Hz, 1H), 7.78 (d, *J* = 11.6 Hz, 2H), 7.75–7.68 (m, 2H), 7.62 (d, *J* = 8.8 Hz, 3H), 7.48–7.31 (m, 3H), 7.27–7.22 (m, 1H), 7.05–6.97 (m, 1H), 4.89 (s, 1H), 1.97 (s, 3H); <sup>13</sup>C NMR (100 MHz, CDCl<sub>3</sub>) δ 191.4, 191.3, 177.0, 163.9, 163.8, 161.4, 161.3, 155.5, 138.3, 138.2, 137.6, 137.5, 134.6, 133.8, 131.8, 130.3, 130.2, 129.7, 129.6, 129.2, 127.0, 125.7, 124.20, 124.17, 123.14, 123.11, 120.6, 120.4, 115.5, 115.34, 115.30, 115.0, 114.8, 78.2, 75.5, 58.6, 16.0; <sup>19</sup>F NMR (376 MHz, CDCl<sub>3</sub>) δ -111.41, -111.98; HRMS (ESI) m/z: [M+H]<sup>+</sup> Calcd for C<sub>26</sub>H<sub>18</sub>F<sub>2</sub>IN<sub>2</sub>O<sub>2</sub>S<sup>+</sup> 587.0096; Found 587.0098.



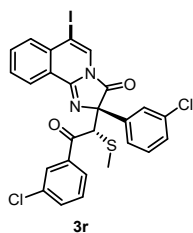

**(R)-2-(3-Chlorophenyl)-2-((S)-2-(3-chlorophenyl)-1-(methylthio)-2-oxoethyl)-6-iodoimidazo[2,1-a]isoquinolin-3(2H)-one (3r)**

Purification by column chromatography on silica gel using petroleum ether/ethyl acetate (20:1 v/v) as eluent afforded **3r** (191.6 mg, yield 62%) as yellow solid ( $R_f = 0.3$ ); m.p. 176-178 °C;  $^1\text{H}$  NMR (400 MHz,  $\text{CDCl}_3$ )  $\delta$  8.30 (d,  $J = 6.4$  Hz, 1H), 7.94 (d,  $J = 24.0$  Hz, 3H), 7.78 (s, 2H), 7.60 (s, 2H), 7.46 (d,  $J = 19.6$  Hz, 2H), 7.40–7.24 (m, 3H), 4.88 (s, 1H), 1.97 (s, 3H);  $^{13}\text{C}$  NMR (100 MHz,  $\text{CDCl}_3$ )  $\delta$  191.3, 176.9, 155.5, 137.7, 136.9, 134.8, 134.5, 134.3, 133.8, 133.3, 131.7, 129.9, 129.4, 129.2, 128.7, 128.6, 127.8, 126.8, 126.5, 125.7, 123.0, 78.2, 75.3, 58.6, 16.0; HRMS (ESI)  $m/z$ :  $[\text{M}+\text{H}]^+$  Calcd for  $\text{C}_{26}\text{H}_{18}\text{Cl}_2\text{IN}_2\text{O}_2\text{S}^+$  618.9505; Found 618.9504.

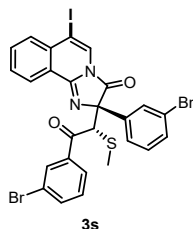

**(R)-2-(3-Bromophenyl)-2-((S)-2-(3-bromophenyl)-1-(methylthio)-2-oxoethyl)-6-iodoimidazo[2,1-a]isoquinolin-3(2H)-one (3s)**

Purification by column chromatography on silica gel using petroleum ether/ethyl acetate (20:1 v/v) as eluent afforded **3s** (215.3 mg, yield 61%) as yellow solid ( $R_f = 0.3$ ); m.p. 179-181 °C;  $^1\text{H}$  NMR (400 MHz,  $\text{CDCl}_3$ )  $\delta$  8.30 (d,  $J = 7.6$  Hz, 1H), 8.09 (d,  $J = 21.2$  Hz, 2H), 7.96 (d,  $J = 8.0$  Hz, 1H), 7.84 (d,  $J = 7.6$  Hz, 1H), 7.77 (s, 1H), 7.67–7.57 (m, 3H), 7.47–7.39 (m, 2H), 7.32–7.21 (m, 2H), 4.86 (s, 1H), 1.97 (s, 3H);  $^{13}\text{C}$  NMR (100 MHz,  $\text{CDCl}_3$ )  $\delta$  191.2, 176.8, 155.5, 137.9, 137.1, 136.2, 134.5, 133.8, 131.7, 131.6, 131.5, 130.6, 130.1, 129.6, 129.1, 127.0, 126.8, 126.2, 125.7, 123.0, 122.8, 122.4, 78.2, 75.2, 58.7, 16.0; HRMS (ESI)  $m/z$ :  $[\text{M}+\text{H}]^+$  Calcd for  $\text{C}_{26}\text{H}_{18}\text{Br}_2\text{IN}_2\text{O}_2\text{S}^+$  706.8495; Found 706.8493.

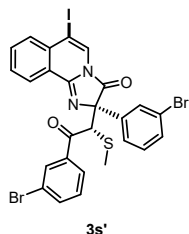

**(S)-2-(3-Bromophenyl)-2-((S)-2-(3-bromophenyl)-1-(methylthio)-2-oxoethyl)-6-iodoimidazo[2,1-a]isoquinolin-3(2H)-one (3s')**

Purification by column chromatography on silica gel using petroleum ether/ethyl acetate (30:1 v/v) as eluent afforded **3s'** (63.5 mg, yield 18%) as yellow solid ( $R_f = 0.3$ ); m.p. 168-170 °C;  $^1\text{H}$  NMR (400 MHz,  $\text{CDCl}_3$ )  $\delta$  8.42 (d,  $J = 7.6$  Hz, 1H), 8.08 (s, 2H), 7.89 (t,  $J = 6.8$  Hz, 2H), 7.65–7.59 (m,

4H), 7.54–7.46 (m, 2H), 7.28–7.24 (m, 2H), 4.84 (s, 1H), 2.14 (s, 3H); <sup>13</sup>C NMR (100 MHz, CDCl<sub>3</sub>) δ 193.1, 178.6, 155.0, 139.7, 136.8, 136.3, 134.3, 133.6, 131.8, 131.7, 131.4, 130.2, 130.0, 129.8, 129.3, 127.0, 126.8, 125.6, 125.5, 123.6, 122.7, 122.5, 78.4, 58.3, 15.4; HRMS (ESI) m/z: [M+H]<sup>+</sup> Calcd for C<sub>26</sub>H<sub>18</sub>Br<sub>2</sub>IN<sub>2</sub>O<sub>2</sub>S<sup>+</sup> 706.8495; Found 706.8497.

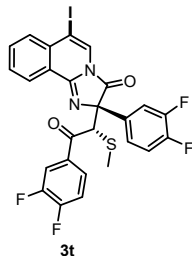

**(R)-2-(3,4-Difluorophenyl)-2-((S)-2-(3,4-difluorophenyl)-1-(methylthio)-2-oxoethyl)-6-iodoimidazo[2,1-a]isoquinolin-3(2H)-one (3t)**

Purification by column chromatography on silica gel using petroleum ether/ethyl acetate (30:1 v/v) as eluent afforded **3t** (186.6 mg, yield 60%) as yellow solid (R<sub>f</sub> = 0.28); m.p. 156-158 °C; <sup>1</sup>H NMR (400 MHz, CDCl<sub>3</sub>) δ 8.31 (s, 1H), 7.97–7.59 (m, 7H), 7.48 (s, 1H), 7.29–7.09 (m, 2H), 4.80 (s, 1H), 2.00 (s, 3H); <sup>13</sup>C NMR (100 MHz, CDCl<sub>3</sub>) δ 190.1, 176.8, 155.7, 155.1, 155.0, 152.6, 152.4, 151.6, 151.5, 151.4, 151.2, 151.0, 149.2, 149.0, 148.9, 148.7, 148.6, 134.6, 134.0, 132.5, 132.2, 131.9, 129.3, 126.8, 125.7, 123.8, 122.9, 118.2, 118.0, 117.6, 117.4, 117.2, 117.0, 116.9, 116.8, 78.4, 74.7, 58.5, 15.8; <sup>19</sup>F NMR (376 MHz, CDCl<sub>3</sub>) δ -128.34, -128.40, -135.45, -135.51, -136.48, -136.53, -137.33, -137.39; HRMS (ESI) m/z: [M+H]<sup>+</sup> Calcd for C<sub>26</sub>H<sub>16</sub>F<sub>4</sub>IN<sub>2</sub>O<sub>2</sub>S<sup>+</sup> 622.9908; Found 622.9907.

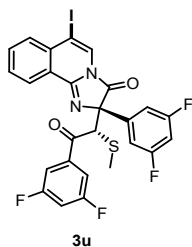

**(R)-2-(3,5-Difluorophenyl)-2-((S)-2-(3,5-difluorophenyl)-1-(methylthio)-2-oxoethyl)-6-iodoimidazo[2,1-a]isoquinolin-3(2H)-one (3u)**

Purification by column chromatography on silica gel using petroleum ether/ethyl acetate (50:1 v/v) as eluent afforded **3u** (177.3 mg, yield 57%) as yellow solid (R<sub>f</sub> = 0.2); m.p. 149-151 °C; <sup>1</sup>H NMR (400 MHz, CDCl<sub>3</sub>) δ 8.32 (d, *J* = 8.0 Hz, 1H), 7.79 (s, 1H), 7.71–7.65 (m, 2H), 7.56–7.45 (m, 5H), 7.06–6.98 (m, 1H), 6.82–6.74 (m, 1H), 4.76 (s, 1H), 2.01 (s, 3H); <sup>13</sup>C NMR (100 MHz, CDCl<sub>3</sub>) δ 189.9, 176.5, 164.2, 164.1, 163.9, 163.8, 161.7, 161.6, 161.5, 161.3, 156.0, 139.4, 138.3, 138.2, 138.1, 134.7, 134.1, 131.9, 129.4, 126.8, 125.8, 122.9, 111.8, 111.7, 111.6, 111.5, 111.0, 110.9, 110.8, 110.7, 109.1, 108.9, 108.6, 104.4, 104.1, 103.9, 78.5, 75.0, 58.6, 15.9; <sup>19</sup>F NMR (376 MHz, CDCl<sub>3</sub>) δ -107.56, -108.62; HRMS (ESI) m/z: [M+H]<sup>+</sup> Calcd for C<sub>26</sub>H<sub>16</sub>F<sub>4</sub>IN<sub>2</sub>O<sub>2</sub>S<sup>+</sup> 622.9908; Found 622.9907.

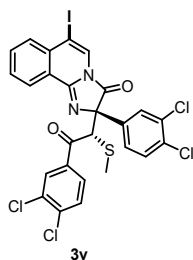

**(*R*)-2-(3,4-Dichlorophenyl)-2-((*S*)-2-(3,4-dichlorophenyl)-1-(methylthio)-2-oxoethyl)-6-iodoimidazo[2,1-*a*]isoquinolin-3(2*H*)-one (3v)**

Purification by column chromatography on silica gel using petroleum ether/ethyl acetate (30:1 v/v) as eluent afforded **3v** (181.8 mg, yield 53%) as yellow solid (*R*<sub>f</sub> = 0.3); m.p. 185-187 °C; <sup>1</sup>H NMR (400 MHz, CDCl<sub>3</sub>) δ 8.31 (d, *J* = 7.6 Hz, 1H), 8.05 (s, 2H), 7.86 (d, *J* = 8.4 Hz, 1H), 7.77 (d, *J* = 10.0 Hz, 2H), 7.69–7.63 (m, 2H), 7.52–7.42 (m, 3H), 4.80 (s, 1H), 2.00 (s, 3H); <sup>13</sup>C NMR (100 MHz, CDCl<sub>3</sub>) δ 190.2, 176.7, 155.8, 138.1, 135.8, 134.62, 134.57, 133.9, 133.2, 132.8, 132.4, 131.8, 130.63, 130.61, 130.0, 129.6, 129.3, 127.6, 126.9, 126.7, 125.7, 122.8, 78.5, 74.7, 58.4, 15.8; HRMS (ESI) *m/z*: [M+H]<sup>+</sup> Calcd for C<sub>26</sub>H<sub>16</sub>Cl<sub>4</sub>IN<sub>2</sub>O<sub>2</sub>S<sup>+</sup> 686.8726; Found 686.8725.

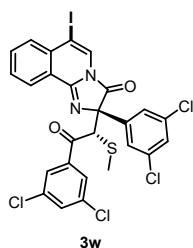

**(*R*)-2-(3,5-Dichlorophenyl)-2-((*S*)-2-(3,5-dichlorophenyl)-1-(methylthio)-2-oxoethyl)-6-iodoimidazo[2,1-*a*]isoquinolin-3(2*H*)-one (3w)**

Purification by column chromatography on silica gel using petroleum ether/ethyl acetate (50:1 v/v) as eluent afforded **3w** (185.2 mg, yield 54%) as yellow solid (*R*<sub>f</sub> = 0.2); m.p. 180-182 °C; <sup>1</sup>H NMR (400 MHz, CDCl<sub>3</sub>) δ 8.32 (d, *J* = 7.6 Hz, 1H), 7.88 (s, 2H), 7.80 (s, 3H), 7.71–7.64 (m, 2H), 7.56–7.47 (m, 2H), 7.33 (s, 1H), 4.73 (s, 1H), 2.02 (s, 3H); <sup>13</sup>C NMR (100 MHz, CDCl<sub>3</sub>) δ 189.9, 176.4, 156.0, 138.9, 137.6, 135.6, 134.9, 134.7, 134.1, 133.2, 131.9, 129.4, 128.8, 127.0, 126.7, 126.2, 125.9, 122.8, 78.6, 74.7, 58.7, 15.9; HRMS (ESI) *m/z*: [M+H]<sup>+</sup> Calcd for C<sub>26</sub>H<sub>16</sub>Cl<sub>4</sub>IN<sub>2</sub>O<sub>2</sub>S<sup>+</sup> 686.8726; Found 686.8726.

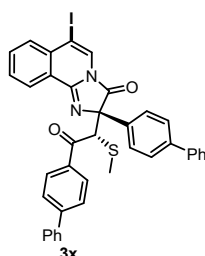

**(*R*)-2-([1,1'-Biphenyl]-4-yl)-2-((*S*)-2-([1,1'-biphenyl]-4-yl)-1-(methylthio)-2-oxoethyl)-6-iodoimidazo[2,1-*a*]isoquinolin-3(2*H*)-one (3x)**

Purification by column chromatography on silica gel using petroleum ether/ethyl acetate (20:1 v/v) as eluent afforded **3x** (231.7 mg, yield 66%) as yellow solid (*R*<sub>f</sub> = 0.3); m.p. 198-200 °C; <sup>1</sup>H NMR

(400 MHz, CDCl<sub>3</sub>)  $\delta$  8.31 (d,  $J$  = 7.6 Hz, 1H), 8.11 (d,  $J$  = 7.6 Hz, 2H), 8.03 (d,  $J$  = 7.6 Hz, 2H), 7.80 (s, 1H), 7.64–7.51 (m, 10H), 7.40–7.27 (m, 7H), 5.13 (s, 1H), 2.01 (s, 3H); <sup>13</sup>C NMR (100 MHz, CDCl<sub>3</sub>)  $\delta$  192.2, 177.4, 155.0, 145.9, 141.0, 140.2, 139.4, 134.9, 134.4, 134.0, 133.4, 131.5, 129.1, 128.9, 128.8, 128.6, 128.2, 128.0, 127.3, 127.10, 127.06, 126.9, 126.8, 125.5, 123.2, 77.9, 75.9, 58.4, 16.0; HRMS (ESI)  $m/z$ : [M+H]<sup>+</sup> Calcd for C<sub>38</sub>H<sub>28</sub>IN<sub>2</sub>O<sub>2</sub>S<sup>+</sup> 703.0911; Found 703.0910.

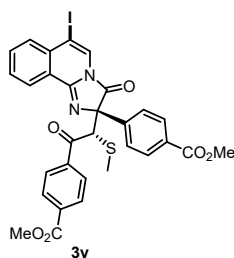

**Methyl 4-((*R*)-6-iodo-2-((*S*)-2-(4-(methoxycarbonyl)phenyl)-1-(methylthio)-2-oxoethyl)-3-oxo-2,3-dihydroimidazo[2,1-*a*]isoquinolin-2-yl)benzoate (**3y**)**

Purification by column chromatography on silica gel using petroleum ether/ethyl acetate (8:1 v/v) as eluent afforded **3y** (209.8 mg, yield 63%) as yellow solid ( $R_f$  = 0.3); m.p. 169–171 °C; <sup>1</sup>H NMR (400 MHz, CDCl<sub>3</sub>)  $\delta$  8.33 (d,  $J$  = 8.0 Hz, 1H), 8.10–8.02 (m, 6H), 7.99 (d,  $J$  = 8.4 Hz, 2H), 7.80 (s, 1H), 7.66–7.60 (m, 2H), 7.49–7.42 (m, 1H), 5.00 (s, 1H), 3.92 (s, 3H), 3.90 (s, 3H), 1.95 (s, 3H); <sup>13</sup>C NMR (100 MHz, CDCl<sub>3</sub>)  $\delta$  191.9, 176.8, 166.5, 165.9, 155.5, 140.7, 138.8, 134.5, 134.0, 133.8, 131.7, 130.0, 129.7, 129.4, 129.2, 128.4, 127.5, 126.8, 125.6, 123.0, 78.3, 75.8, 58.7, 52.4, 52.1, 16.1; HRMS (ESI)  $m/z$ : [M+H]<sup>+</sup> Calcd for C<sub>30</sub>H<sub>24</sub>IN<sub>2</sub>O<sub>6</sub>S<sup>+</sup> 667.0394; Found 667.0396.

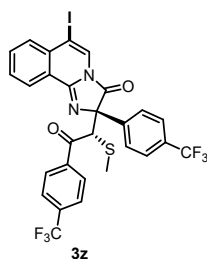

**(*R*)-6-Iodo-2-((*S*)-1-(methylthio)-2-oxo-2-(4-(trifluoromethyl)phenyl)ethyl)-2-(4-(trifluoromethyl)phenyl)imidazo[2,1-*a*]isoquinolin-3(2*H*)-one (**3z**)**

Purification by column chromatography on silica gel using petroleum ether/ethyl acetate (8:1 v/v) as eluent afforded **3z** (205.8 mg, yield 60%) as yellow solid ( $R_f$  = 0.3); m.p. 150–152 °C; <sup>1</sup>H NMR (400 MHz, CDCl<sub>3</sub>)  $\delta$  8.34 (d,  $J$  = 6.8 Hz, 1H), 8.14 (d,  $J$  = 7.6 Hz, 2H), 8.06 (d,  $J$  = 7.6 Hz, 2H), 7.81 (s, 1H), 7.72–7.61 (m, 6H), 7.49 (s, 1H), 4.98 (s, 1H), 1.99 (s, 3H); <sup>13</sup>C NMR (100 MHz, CDCl<sub>3</sub>)  $\delta$  191.4, 176.9, 155.8, 139.7, 138.2, 134.9, 134.7, 134.5, 134.0, 131.9, 130.8, 130.5, 129.3, 128.9, 128.0, 126.8, 125.70, 125.67, 125.2, 125.14, 125.11, 124.8, 123.0, 122.5, 122.0, 78.5, 75.6, 58.6, 15.9; <sup>19</sup>F NMR (376 MHz, CDCl<sub>3</sub>)  $\delta$  -62.63, -63.17; HRMS (ESI)  $m/z$ : [M+H]<sup>+</sup> Calcd for C<sub>28</sub>H<sub>18</sub>F<sub>6</sub>IN<sub>2</sub>O<sub>2</sub>S<sup>+</sup> 687.0032; Found 687.0029.

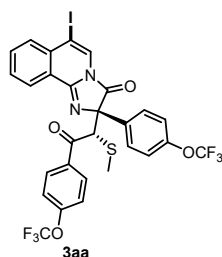

**(R)-6-Iodo-2-((S)-1-(methylthio)-2-oxo-2-(4-(trifluoromethoxy)phenyl)ethyl)-2-(4-(trifluoromethoxy)phenyl)imidazo[2,1-a]isoquinolin-3(2H)-one (3aa)**

Purification by column chromatography on silica gel using petroleum ether/ethyl acetate (50:1 v/v) as eluent afforded **3aa** (211.8 mg, yield 59%) as yellow solid (R<sub>f</sub> = 0.3); m.p. 139-141 °C; <sup>1</sup>H NMR (400 MHz, CDCl<sub>3</sub>) δ 8.31 (d, *J* = 7.6 Hz, 1H), 8.08–7.97 (m, 4H), 7.80 (s, 1H), 7.65 (d, *J* = 3.2 Hz, 2H), 7.50–7.43 (m, 1H), 7.28–7.19 (m, 4H), 4.90 (s, 1H), 1.98 (s, 3H); <sup>13</sup>C NMR (100 MHz, CDCl<sub>3</sub>) δ 191.2, 177.2, 155.5, 152.8, 149.3, 134.7, 134.4, 133.8, 133.5, 131.8, 130.7, 129.2, 127.0, 125.6, 124.2, 124.1, 123.1, 121.6, 121.5, 120.5, 120.3, 119.1, 118.9, 116.5, 116.3, 78.2, 75.3, 58.6, 15.9; <sup>19</sup>F NMR (376 MHz, CDCl<sub>3</sub>) δ -57.57, -57.79; HRMS (ESI) *m/z*: [M+H]<sup>+</sup> Calcd for C<sub>28</sub>H<sub>18</sub>F<sub>6</sub>IN<sub>2</sub>O<sub>4</sub>S<sup>+</sup> 718.9931; Found 718.9932.

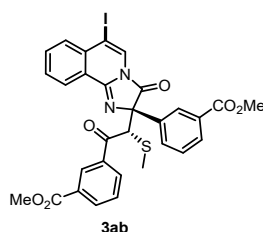

**Methyl 3-((R)-6-iodo-2-((S)-2-(3-(methoxycarbonyl)phenyl)-1-(methylthio)-2-oxoethyl)-3-oxo-2,3-dihydroimidazo[2,1-a]isoquinolin-2-yl)benzoate (3ab)**

Purification by column chromatography on silica gel using petroleum ether/ethyl acetate (5:1 v/v) as eluent afforded **3ab** (186.5 mg, yield 56%) as yellow solid (R<sub>f</sub> = 0.3); m.p. 133-135 °C; <sup>1</sup>H NMR (400 MHz, CDCl<sub>3</sub>) δ 8.62 (d, *J* = 10.8 Hz, 2H), 8.40–7.98 (m, 5H), 7.83 (s, 1H), 7.64 (s, 2H), 7.57–7.40 (m, 3H), 5.01 (s, 1H), 3.93 (s, 6H), 1.96 (s, 3H); <sup>13</sup>C NMR (100 MHz, CDCl<sub>3</sub>) δ 191.9, 177.1, 166.8, 166.0, 155.5, 136.3, 135.5, 134.7, 134.2, 133.8, 132.8, 132.1, 131.8, 130.6, 130.3, 129.7, 129.6, 129.2, 128.9, 128.8, 128.3, 127.0, 125.9, 123.1, 78.2, 75.5, 58.9, 52.4, 52.2, 16.1; HRMS (ESI) *m/z*: [M+H]<sup>+</sup> Calcd for C<sub>30</sub>H<sub>24</sub>IN<sub>2</sub>O<sub>6</sub>S<sup>+</sup> 667.0394; Found 667.0395.

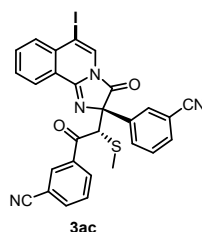

**3-((R)-2-((S)-2-(3-Cyanophenyl)-1-(methylthio)-2-oxoethyl)-6-iodo-3-oxo-2,3-dihydroimidazo[2,1-a]isoquinolin-2-yl)benzonitrile (3ac)**

Purification by column chromatography on silica gel using petroleum ether/ethyl acetate (8:1 v/v) as eluent afforded **3ac** (192.0 mg, yield 64%) as yellow solid (R<sub>f</sub> = 0.3); m.p. 175-177 °C; <sup>1</sup>H NMR (400 MHz, CDCl<sub>3</sub>) δ 8.30 (s, 4H), 8.16 (d, *J* = 6.4 Hz, 1H), 7.88–7.76 (m, 2H), 7.73–7.57 (m, 4H),

7.51 (s, 2H), 4.86 (s, 1H), 2.01 (s, 3H);  $^{13}\text{C}$  NMR (100 MHz,  $\text{CDCl}_3$ )  $\delta$  190.5, 176.5, 156.1, 137.2, 136.3, 135.9, 134.6, 134.1, 132.5, 132.4, 132.1, 132.0, 131.9, 131.5, 129.6, 129.4, 128.9, 126.6, 125.7, 122.7, 118.5, 117.6, 113.1, 112.4, 78.6, 74.8, 58.8, 15.8; HRMS (ESI)  $m/z$ :  $[\text{M}+\text{H}]^+$  Calcd for  $\text{C}_{28}\text{H}_{18}\text{IN}_4\text{O}_2\text{S}^+$  601.0190; Found 601.0190.

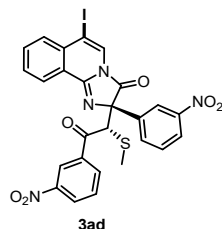

**(*R*)-6-Iodo-2-((*S*)-1-(methylthio)-2-(3-nitrophenyl)-2-oxoethyl)-2-(3-nitrophenyl)imidazo[2,1-*a*]isoquinolin-3(2*H*)-one (3ad)**

Purification by column chromatography on silica gel using petroleum ether/ethyl acetate (5:1 v/v) as eluent afforded **3ad** (185.6 mg, yield 58%) as yellow solid ( $R_f$  = 0.28); m.p. 201-203 °C;  $^1\text{H}$  NMR (400 MHz,  $\text{CDCl}_3$ )  $\delta$  8.89 (s, 1H), 8.83 (s, 1H), 8.45–8.35 (m, 3H), 8.28–8.18 (m, 2H), 7.82 (s, 1H), 7.73–7.62 (m, 3H), 7.62–7.50 (m, 2H), 4.92 (s, 1H), 2.04 (s, 3H);  $^{13}\text{C}$  NMR (100 MHz,  $\text{CDCl}_3$ )  $\delta$  190.4, 176.6, 156.3, 148.3, 148.1, 137.8, 136.3, 134.7, 134.3, 133.7, 132.0, 129.9, 129.5, 129.1, 127.8, 126.7, 125.9, 123.8, 123.6, 123.0, 122.8, 78.8, 74.8, 59.1, 15.8; HRMS (ESI)  $m/z$ :  $[\text{M}+\text{H}]^+$  Calcd for  $\text{C}_{26}\text{H}_{18}\text{IN}_4\text{O}_6\text{S}^+$  640.9986; Found 640.9984.

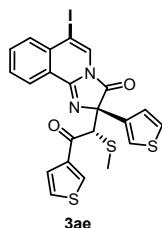

**(*R*)-6-Iodo-2-((*S*)-1-(methylthio)-2-oxo-2-(thiophen-3-yl)ethyl)-2-(thiophen-3-yl)imidazo[2,1-*a*]isoquinolin-3(2*H*)-one (3ae)**

Purification by column chromatography on silica gel using petroleum ether/ethyl acetate (10:1 v/v) as eluent afforded **3ae** (140.5 mg, yield 50%) as yellow solid ( $R_f$  = 0.32); m.p. 167-169 °C;  $^1\text{H}$  NMR (400 MHz,  $\text{CDCl}_3$ )  $\delta$  8.26 (d,  $J$  = 8.0 Hz, 1H), 8.19 (d,  $J$  = 1.6 Hz, 1H), 7.79 (s, 1H), 7.69 (d,  $J$  = 2.0 Hz, 1H), 7.61 (d,  $J$  = 4.0 Hz, 2H), 7.56 (d,  $J$  = 4.8 Hz, 1H), 7.49 (d,  $J$  = 5.2 Hz, 1H), 7.46–7.39 (m, 1H), 7.33–7.24 (m, 2H), 4.74 (s, 1H), 2.01 (s, 3H);  $^{13}\text{C}$  NMR (100 MHz,  $\text{CDCl}_3$ )  $\delta$  187.2, 177.1, 155.3, 139.8, 135.8, 134.6, 133.6, 133.3, 131.7, 129.0, 127.4, 127.1, 126.9, 126.2, 125.6, 125.5, 123.9, 123.3, 77.9, 74.7, 60.1, 16.2; HRMS (ESI)  $m/z$ :  $[\text{M}+\text{H}]^+$  Calcd for  $\text{C}_{22}\text{H}_{16}\text{IN}_2\text{O}_2\text{S}_3^+$  562.9413; Found 562.9415.

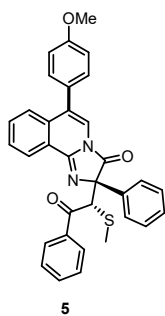

5

**(R)-6-(4-Methoxyphenyl)-2-((S)-1-(methylthio)-2-oxo-2-phenylethyl)-2-phenylimidazo[2,1-a]isoquinolin-3(2H)-one (5):** Yellow solid; 75.3 mg (yield 71%); m.p. 155-157 °C; <sup>1</sup>H NMR (400 MHz, CDCl<sub>3</sub>) δ 8.48 (s, 1H), 8.07–7.92 (m, 4H), 7.57–7.48 (m, 2H), 7.46–7.35 (m, 7H), 7.34–7.30 (m, 2H), 7.29–7.23 (m, 1H), 6.99 (d, *J* = 8.4 Hz, 2H), 5.09 (s, 1H), 3.86 (s, 3H), 1.97 (s, 3H); <sup>13</sup>C NMR (100 MHz, CDCl<sub>3</sub>) δ 192.9, 179.3, 159.4, 155.9, 136.4, 135.8, 135.5, 135.2, 133.2, 132.7, 130.8, 130.2, 128.53, 128.50, 128.2, 128.0, 127.7, 127.5, 126.0, 123.5, 122.3, 118.5, 114.0, 76.3, 58.2, 55.3, 16.1; HRMS (ESI) *m/z*: [M+H]<sup>+</sup> Calcd for C<sub>33</sub>H<sub>27</sub>N<sub>2</sub>O<sub>3</sub>S<sup>+</sup> 531.1737; Found 531.1736.

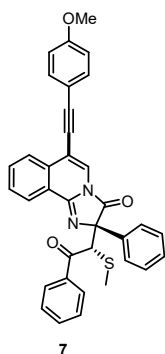

7

**(R)-6-((4-Methoxyphenyl)ethynyl)-2-((S)-1-(methylthio)-2-oxo-2-phenylethyl)-2-phenylimidazo[2,1-a]isoquinolin-3(2H)-one (7):** Yellow solid; 83.1 mg (yield 75%); m.p. 151-153 °C; <sup>1</sup>H NMR (400 MHz, CDCl<sub>3</sub>) δ 8.52 (d, *J* = 7.2 Hz, 1H), 7.97 (t, *J* = 8.8 Hz, 5H), 7.71 (t, *J* = 6.8 Hz, 1H), 7.55 (s, 2H), 7.49 (d, *J* = 8.0 Hz, 3H), 7.44–7.35 (m, 5H), 6.89 (d, *J* = 6.8 Hz, 2H), 5.02 (s, 1H), 3.82 (s, 3H), 2.15 (s, 3H); <sup>13</sup>C NMR (100 MHz, CDCl<sub>3</sub>) δ 194.7, 180.0, 159.8, 154.6, 138.0, 135.4, 133.8, 133.4, 133.1, 132.9, 128.7, 128.5, 128.44, 128.40, 127.1, 126.2, 125.4, 123.6, 123.5, 114.8, 114.1, 105.3, 93.8, 81.9, 77.6, 58.5, 55.3, 15.5; HRMS (ESI) *m/z*: [M+H]<sup>+</sup> Calcd for C<sub>35</sub>H<sub>27</sub>N<sub>2</sub>O<sub>3</sub>S<sup>+</sup> 555.1737; Found 555.1731.

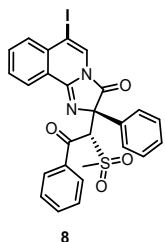

8

**(R)-6-Iodo-2-((S)-1-(methylsulfonyl)-2-oxo-2-phenylethyl)-2-phenylimidazo[2,1-a]isoquinolin-3(2H)-one (8):** Yellow solid; 161.3 mg (yield 84%); m.p. 225-227 °C; <sup>1</sup>H NMR (400 MHz, CDCl<sub>3</sub>) δ 8.62 (d, *J* = 7.6 Hz, 1H), 7.79–7.69 (m, 5H), 7.66–7.58 (m, 3H), 7.53 (t, *J* = 7.6 Hz, 1H), 7.37 (t, *J* = 7.6 Hz, 2H), 7.12–7.06 (m, 3H), 6.06 (s, 1H), 3.24 (s, 3H); <sup>13</sup>C NMR (100 MHz, CDCl<sub>3</sub>) δ 191.3, 177.4, 157.1, 137.6, 134.9, 134.3, 134.1, 133.9, 132.2, 129.6, 128.9, 128.6, 127.0,

126.7, 125.5, 123.0, 78.7, 74.0, 73.8, 41.8; HRMS (ESI)  $m/z$ :  $[M+H]^+$  Calcd for  $C_{26}H_{20}IN_2O_4S^+$  583.0183; Found 583.0179.

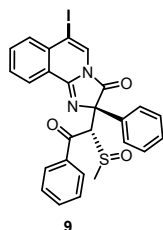

**(R)-6-Iodo-2-((S)-1-((S)-methylsulfinyl)-2-oxo-2-phenylethyl)-2-phenylimidazo[2,1-a]isoquinolin-3(2H)-one (9)**: Yellow solid; 105.3 mg (yield 62%); m.p. 221-223 °C;  $^1H$  NMR (400 MHz,  $CDCl_3$ )  $\delta$  8.30 (d,  $J = 6.8$  Hz, 1H), 8.00 (d,  $J = 7.2$  Hz, 2H), 7.82 (d,  $J = 8.0$  Hz, 3H), 7.63–7.55 (m, 3H), 7.45 (s, 3H), 7.37–7.27 (m, 3H), 5.51 (s, 1H), 2.55 (s, 3H);  $^{13}C$  NMR (100 MHz,  $CDCl_3$ )  $\delta$  192.5, 177.5, 155.7, 136.7, 134.4, 134.3, 133.8, 131.8, 129.7, 129.2, 128.9, 128.7, 127.5, 126.8, 125.8, 123.0, 78.7, 77.5, 74.3, 38.0; HRMS (ESI)  $m/z$ :  $[M+H]^+$  Calcd for  $C_{26}H_{20}IN_2O_3S^+$  567.0234; Found 567.0231.

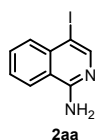

**4-Iodoisoquinolin-1-amine (2aa)**: Yellow solid; 110.7 mg (yield 82%); m.p. 133-135 °C;  $^1H$  NMR (400 MHz,  $CDCl_3$ )  $\delta$  8.29 (s, 1H), 7.91 (d,  $J = 8.4$  Hz, 1H), 7.74–7.66 (m, 2H), 7.53 (t,  $J = 7.6$  Hz, 1H), 5.44 (s, 2H);  $^{13}C$  NMR (100 MHz,  $CDCl_3$ )  $\delta$  156.4, 148.5, 137.4, 131.6, 131.3, 127.2, 123.0, 119.2, 82.7; HRMS (ESI)  $m/z$ :  $[M+H]^+$  Calcd for  $C_9H_8IN_2^+$  270.9727; Found 270.9723.

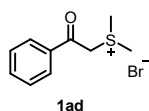

**Dimethyl(2-oxo-2-phenylethyl)sulfoniumbromide (1ad)**: Colorless solid; 962.0 mg (yield 74%);  $^1H$  NMR (400 MHz,  $DMSO-d_6$ )  $\delta$  8.05 (d,  $J = 7.6$  Hz, 2H), 7.79 (t,  $J = 7.6$  Hz, 1H), 7.64 (t,  $J = 7.6$  Hz, 2H), 5.70 (s, 2H), 3.06 (s, 6H);  $^{13}C$  NMR (100 MHz,  $DMSO-d_6$ )  $\delta$  191.4, 135.1, 133.9, 129.2, 128.7, 52.8, 24.5; The  $^1H$  NMR and  $^{13}C$  NMR spectra data are consistent with the reported literature.

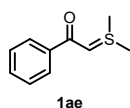

**2-(Dimethyl- $\lambda^4$ -sulfaneylidene)-1-phenylethan-1-one (1ae)**: Yellow solid; 120.6 mg (yield 67%);  $^1H$  NMR (400 MHz,  $CDCl_3$ )  $\delta$  7.78–7.74 (m, 2H), 7.35–7.30 (m, 3H), 4.31 (s, 1H), 2.84 (s, 6H);  $^{13}C$  NMR (100 MHz,  $CDCl_3$ )  $\delta$  182.0, 140.5, 129.0, 127.4, 125.9, 52.3, 28.1; The  $^1H$  NMR and  $^{13}C$  NMR spectra data are consistent with the reported literature.



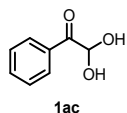

**2,2-Dihydroxy-1-phenylethan-1-one (1ac):** White solid; 52.4 mg (yield 69%);  $^1\text{H}$  NMR (400 MHz,  $\text{DMSO-}d_6$ )  $\delta$  8.12 (d,  $J = 7.6$  Hz, 2H), 7.68–7.61 (m, 1H), 7.58–7.50 (m, 2H), 6.82 (d,  $J = 7.2$  Hz, 2H), 5.76 (t,  $J = 7.2$  Hz, 1H);  $^{13}\text{C}$  NMR (100 MHz,  $\text{DMSO-}d_6$ )  $\delta$  196.3, 133.8, 133.4, 129.5, 128.6, 89.2; The  $^1\text{H}$  NMR and  $^{13}\text{C}$  NMR spectra data are consistent with the reported literature.

## 7. Copies of $^1\text{H}$ NMR, $^{13}\text{C}$ NMR and $^{19}\text{F}$ NMR spectra

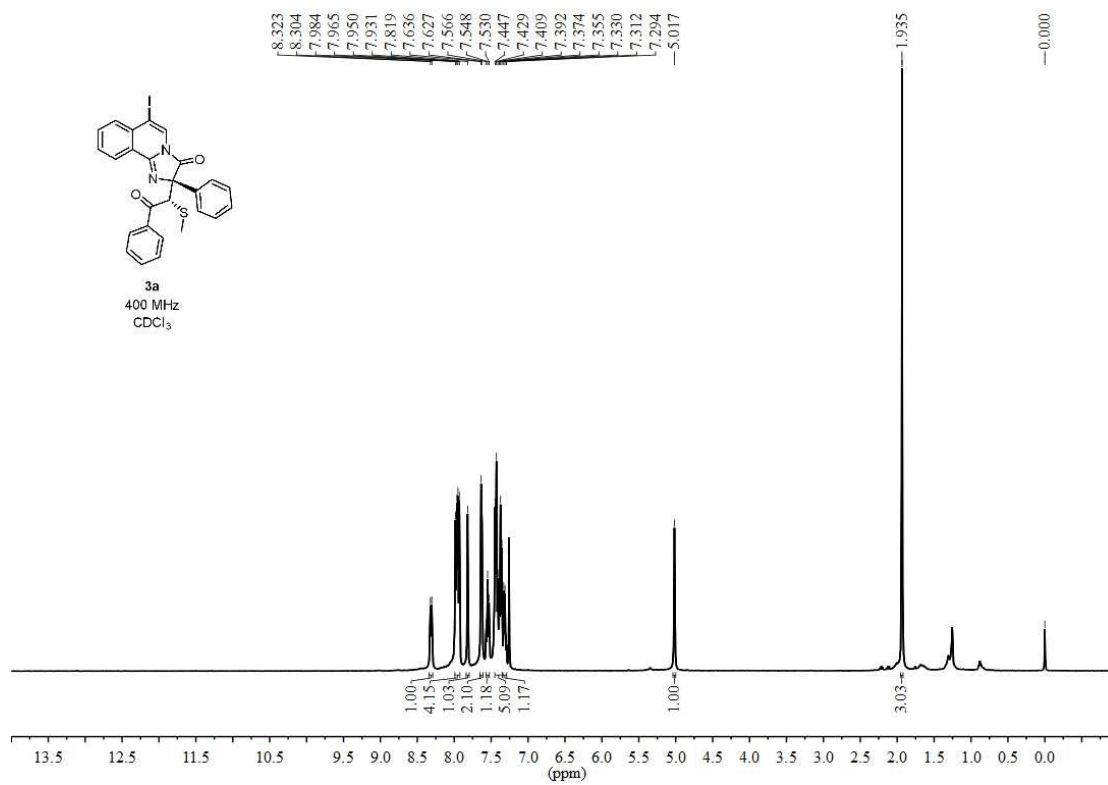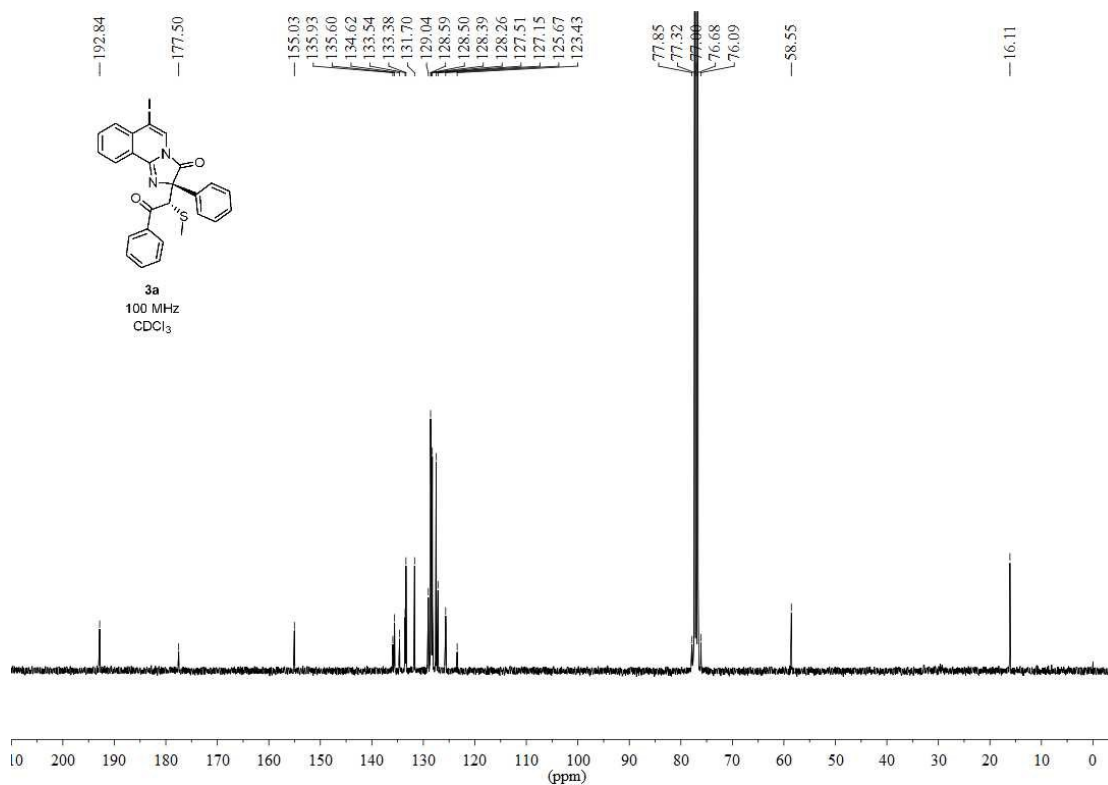

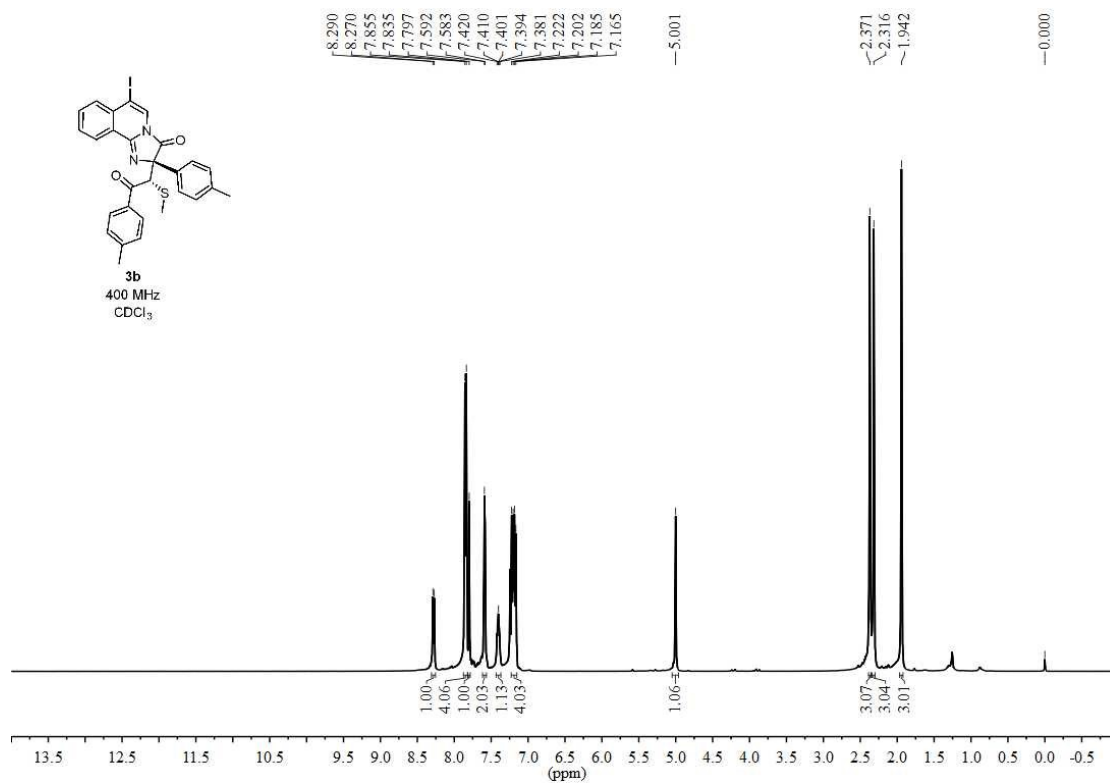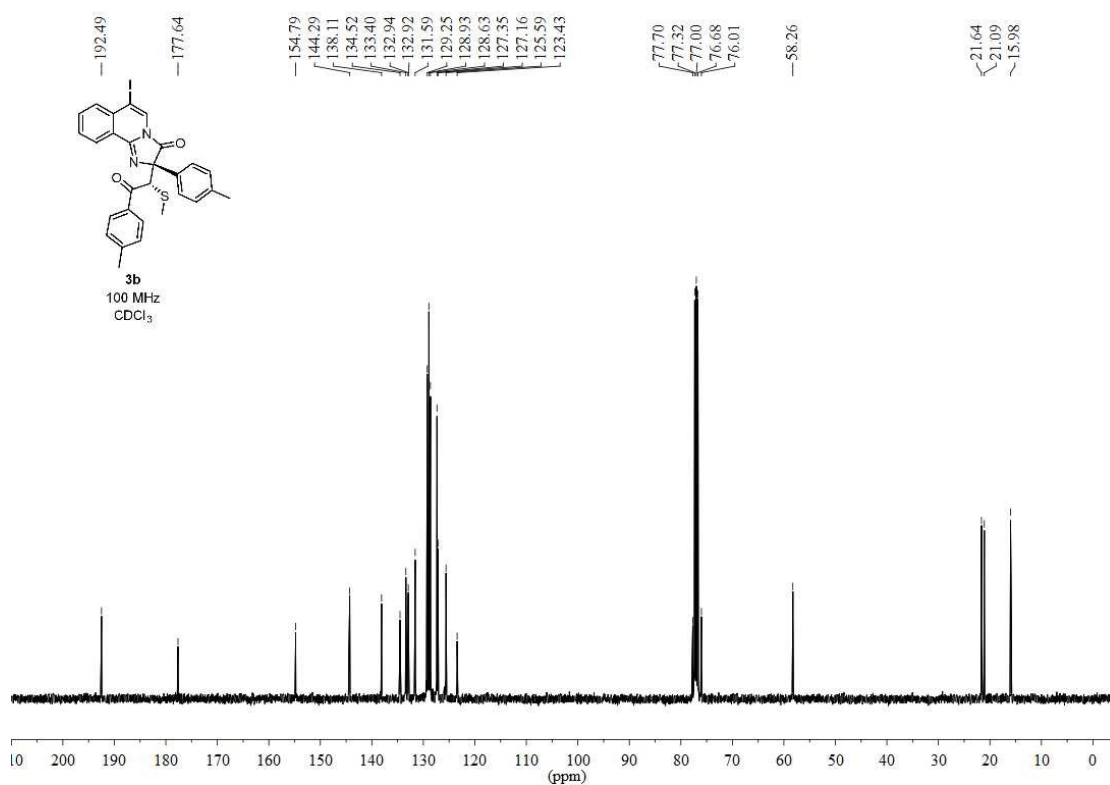

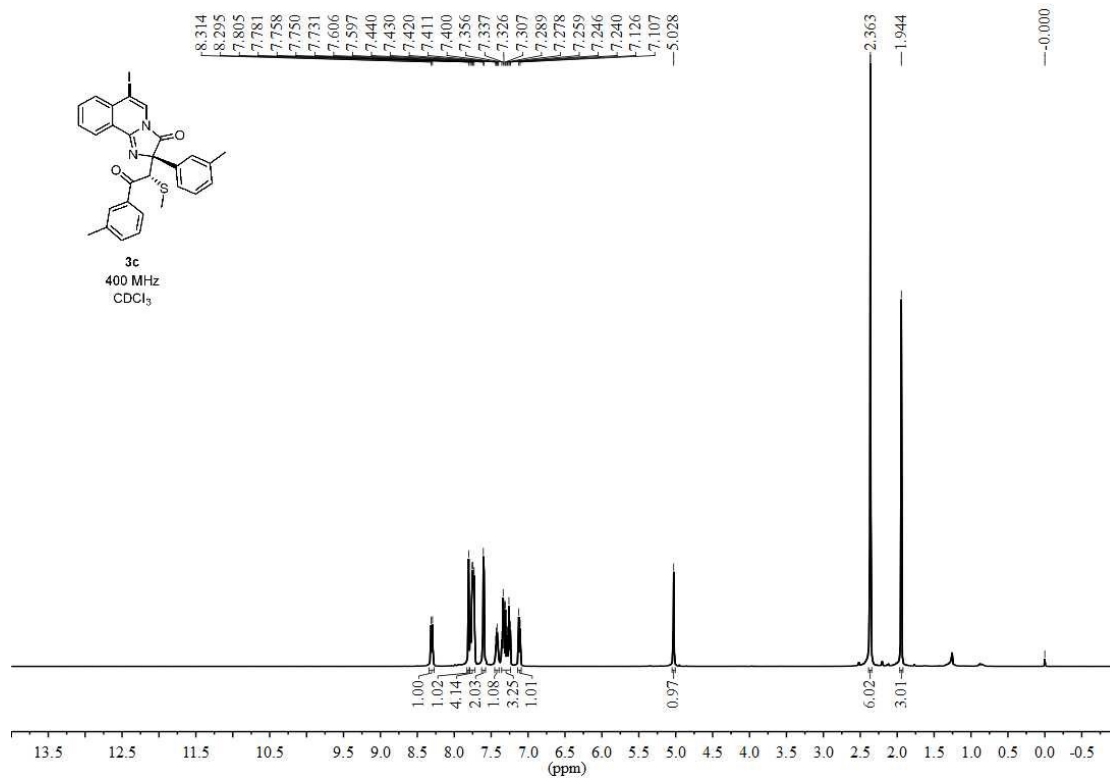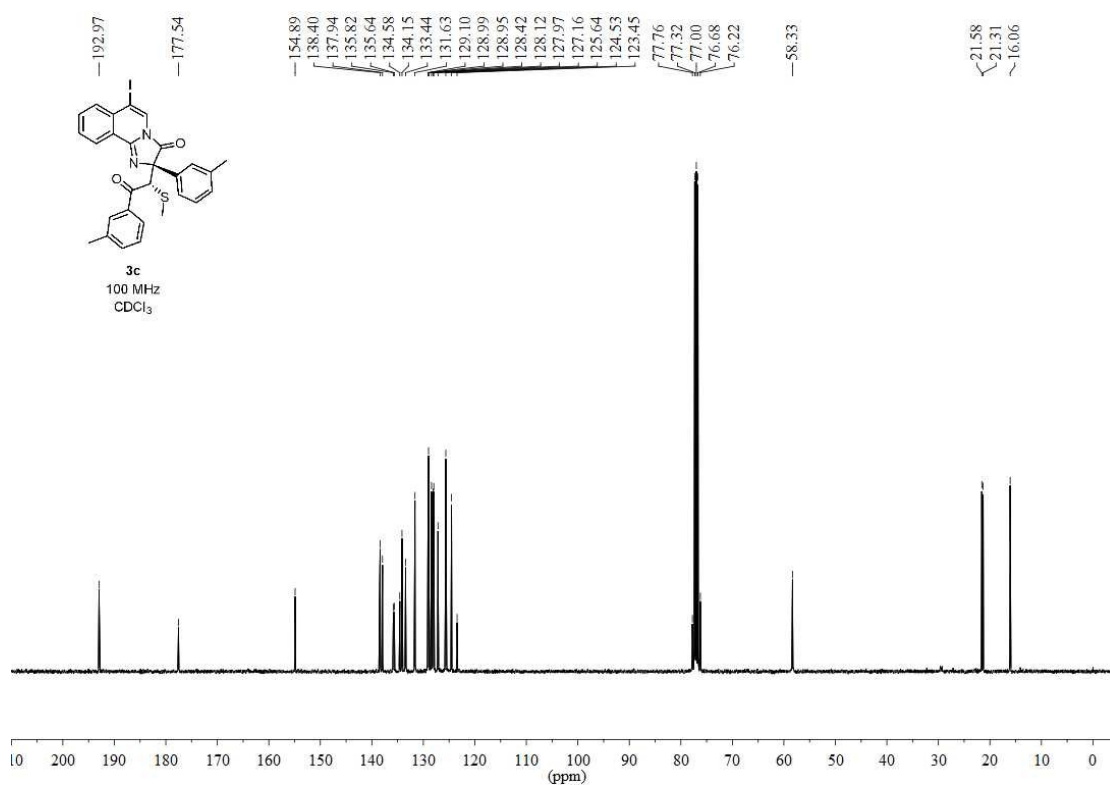

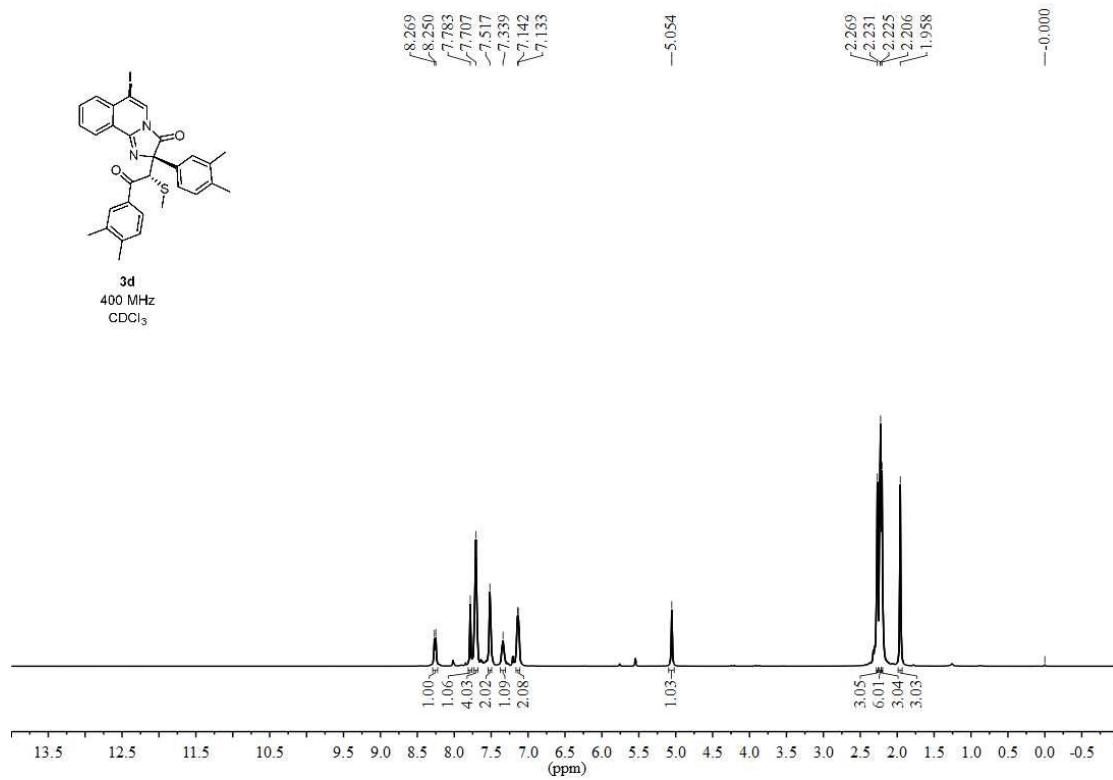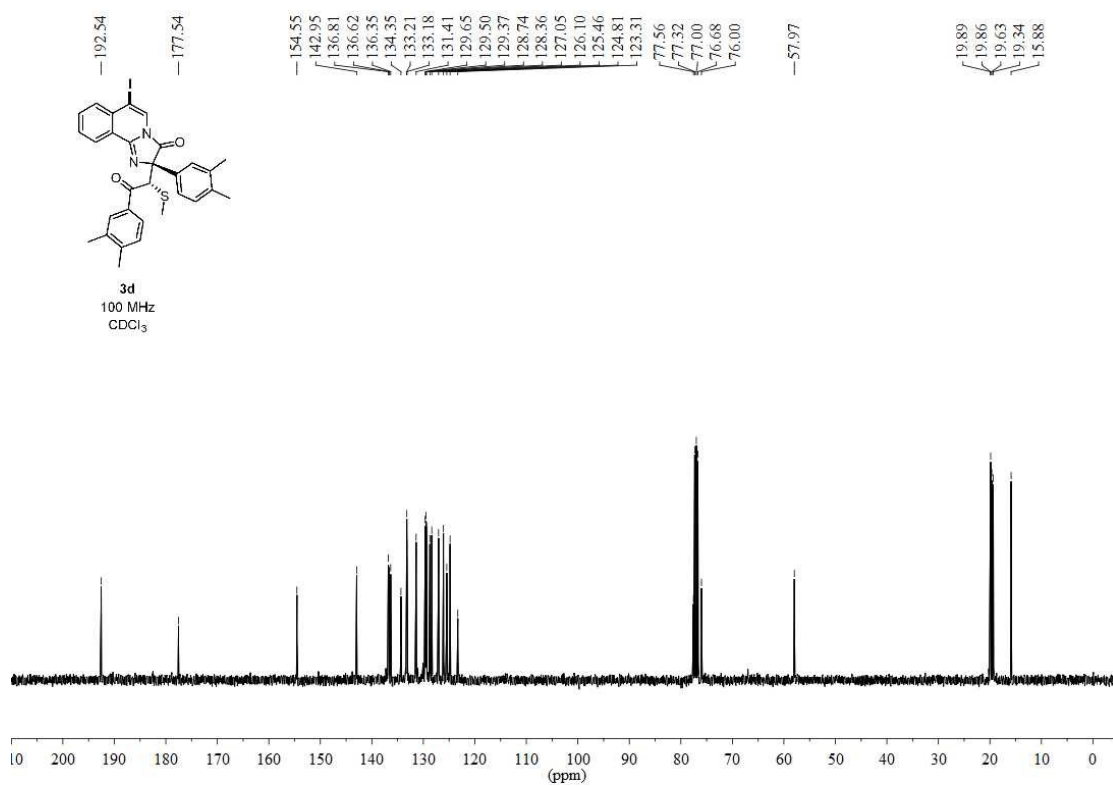

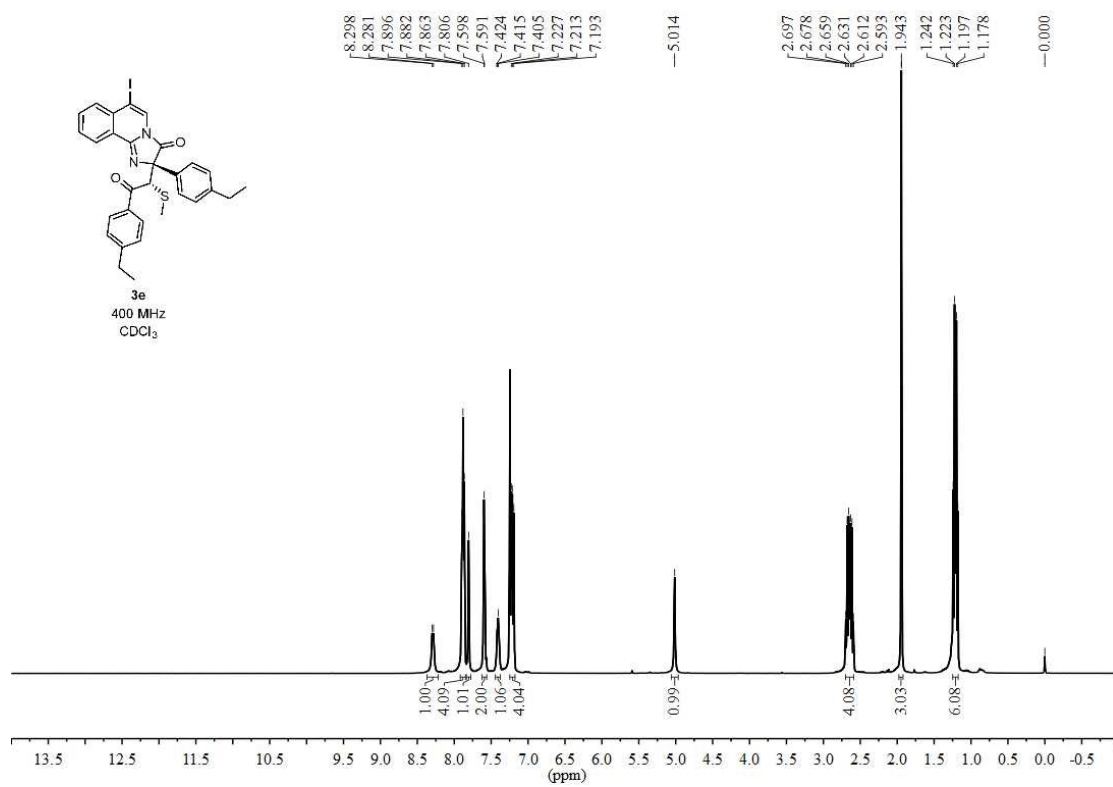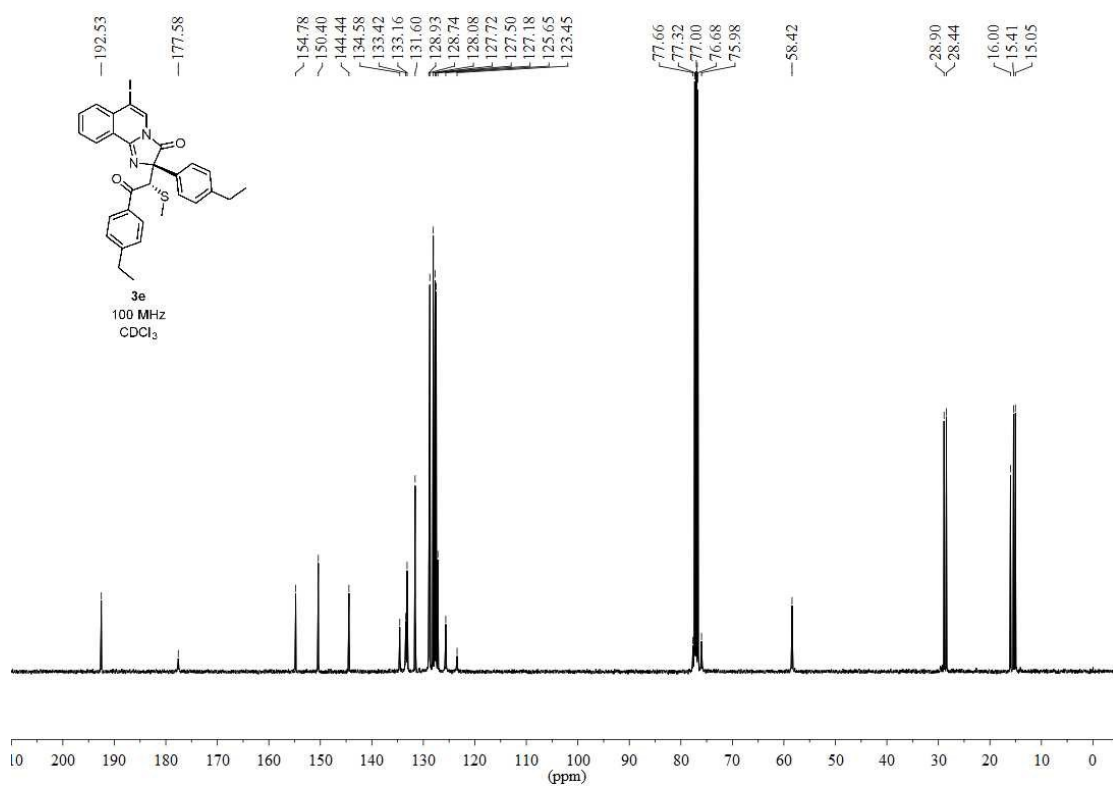

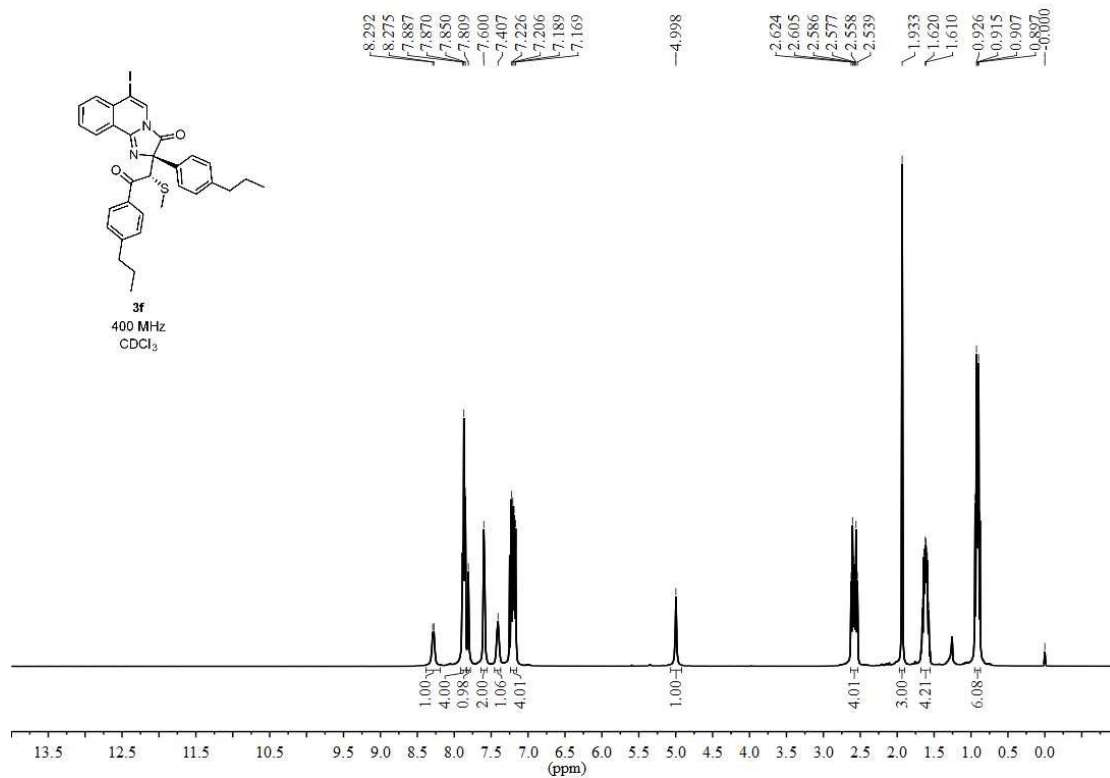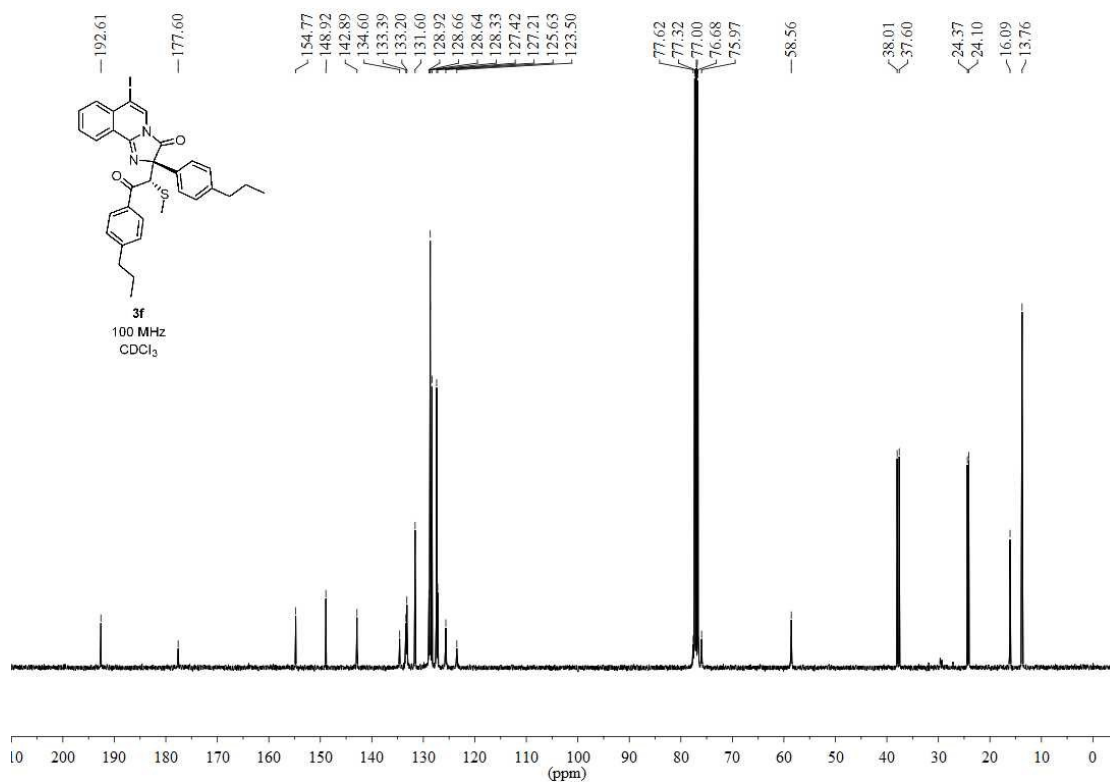

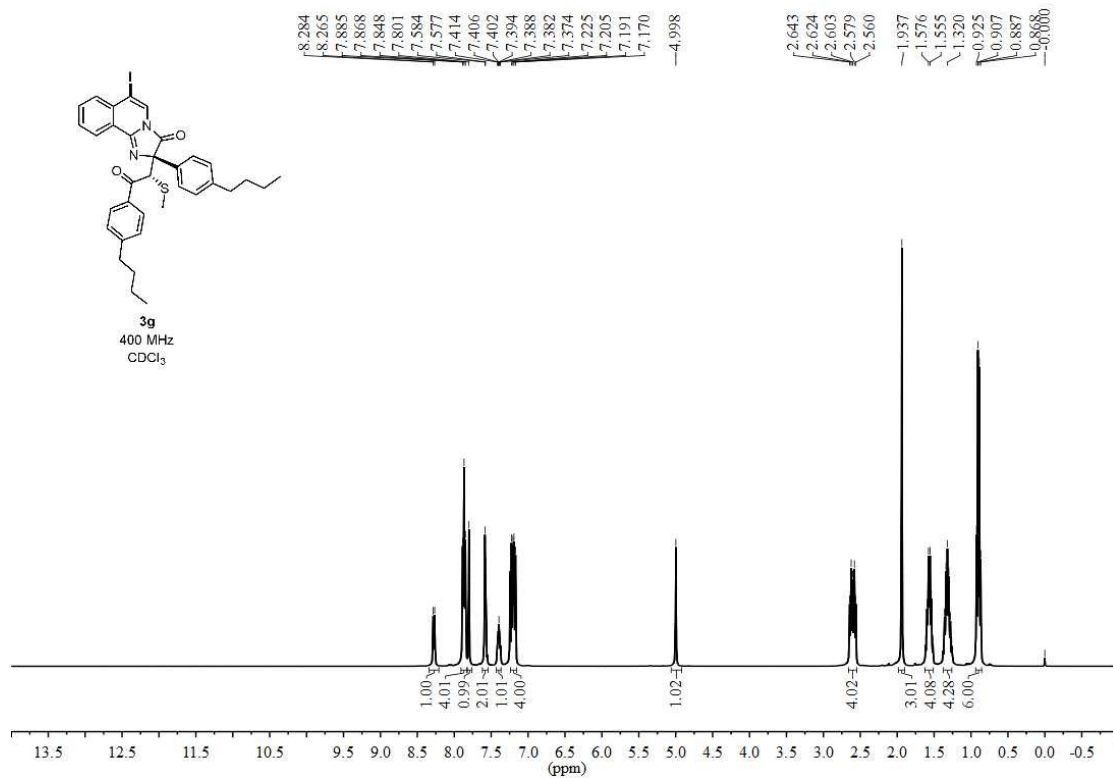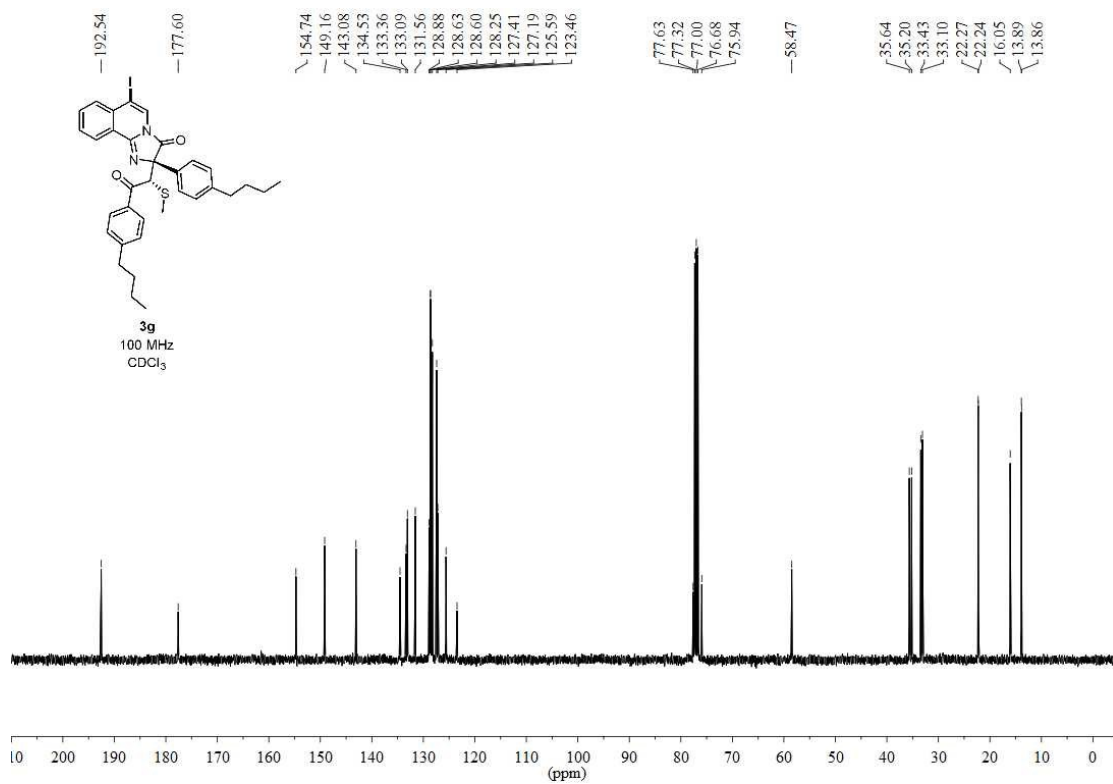



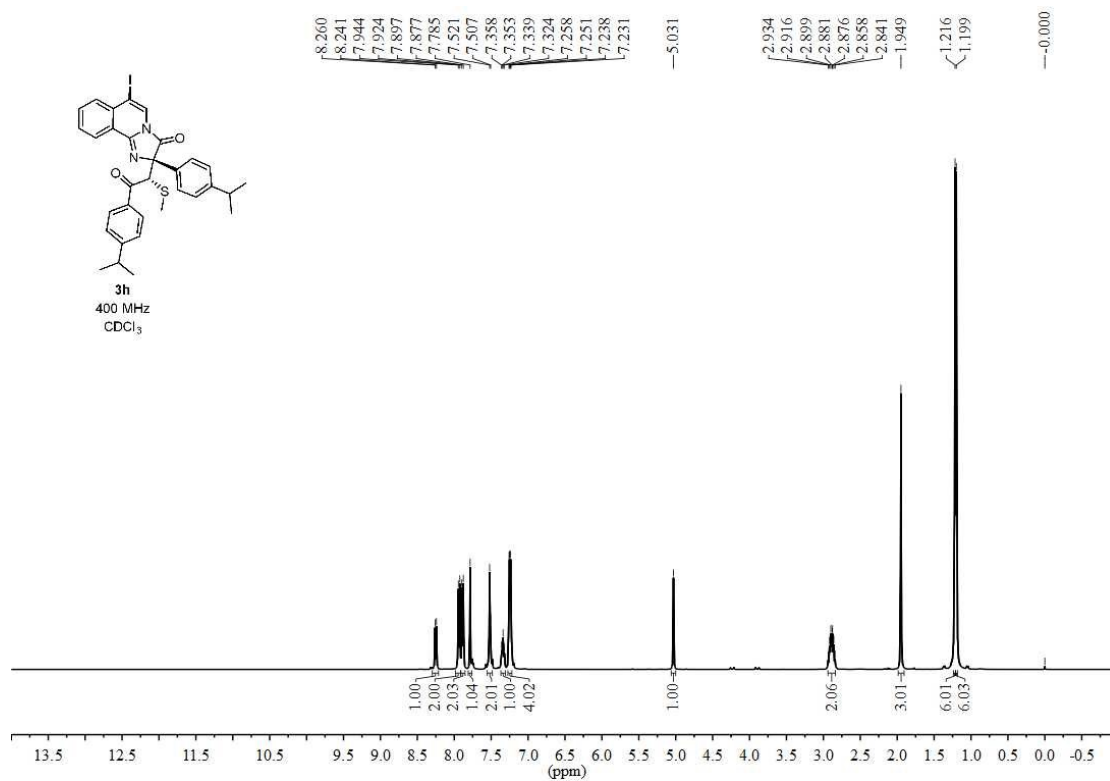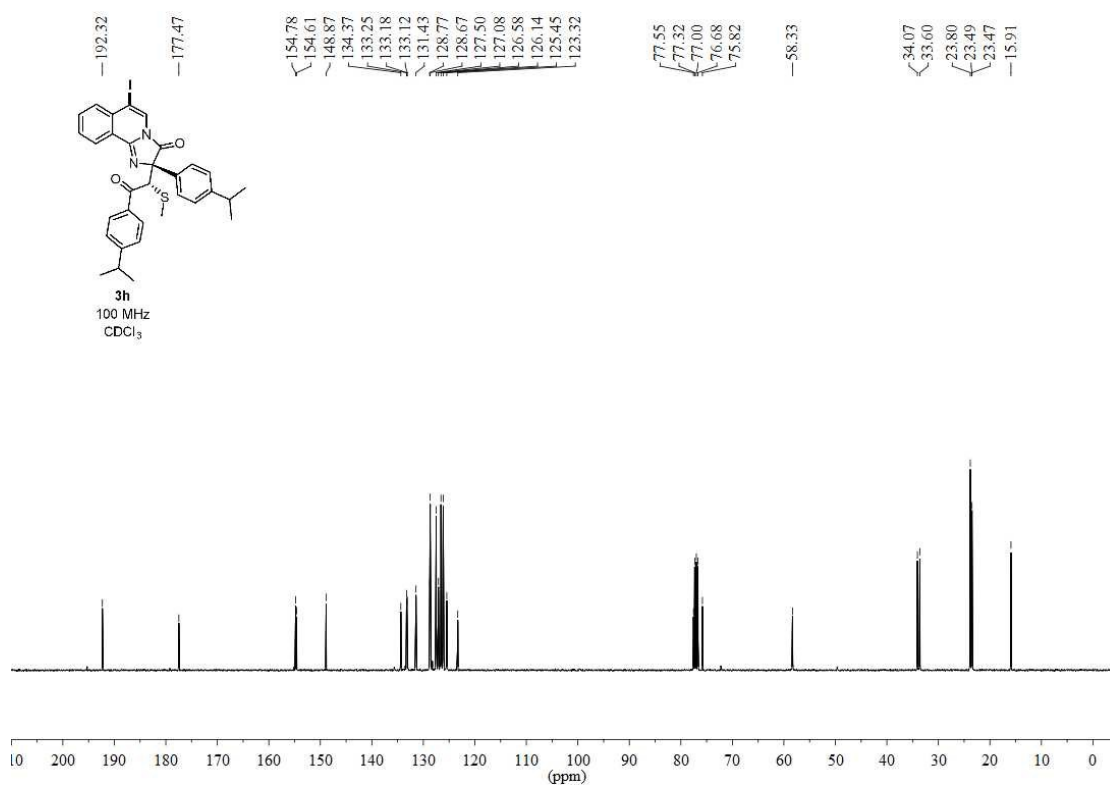

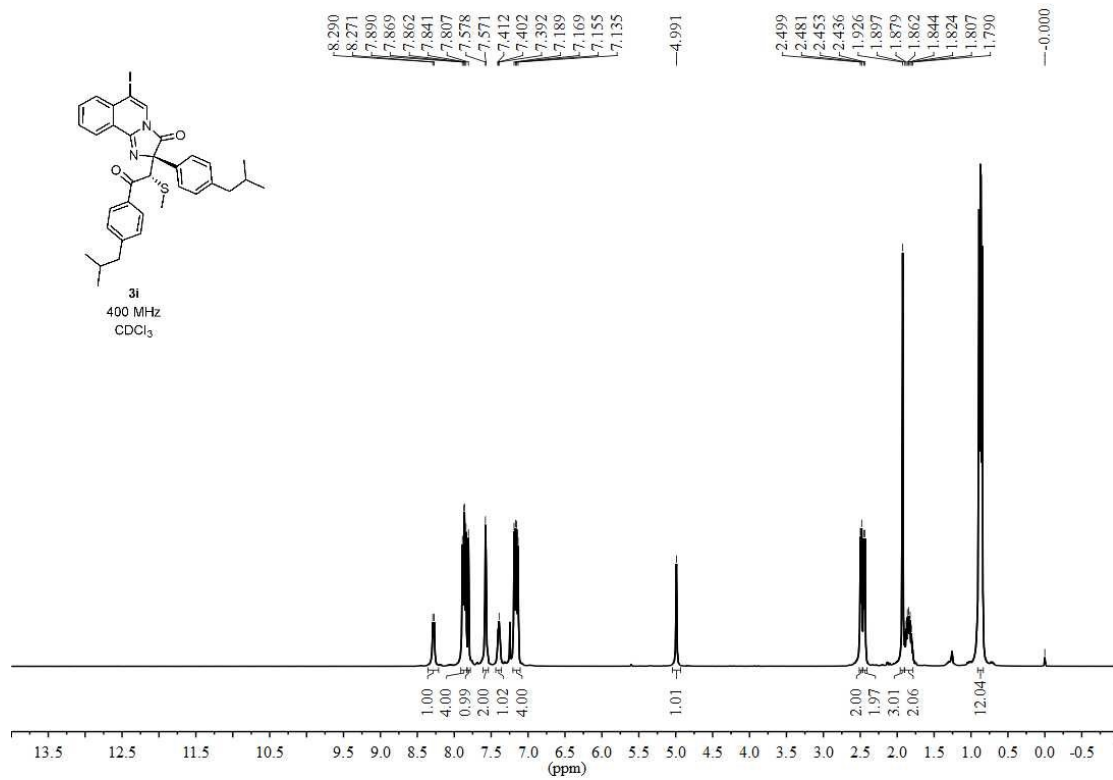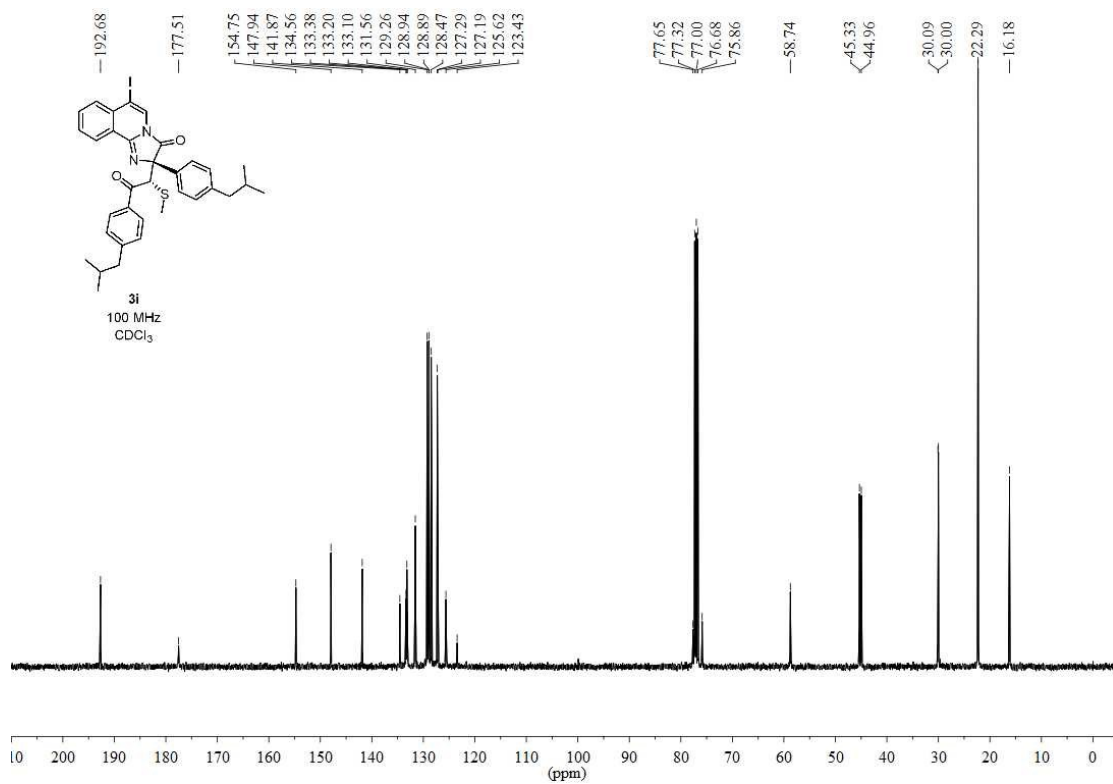

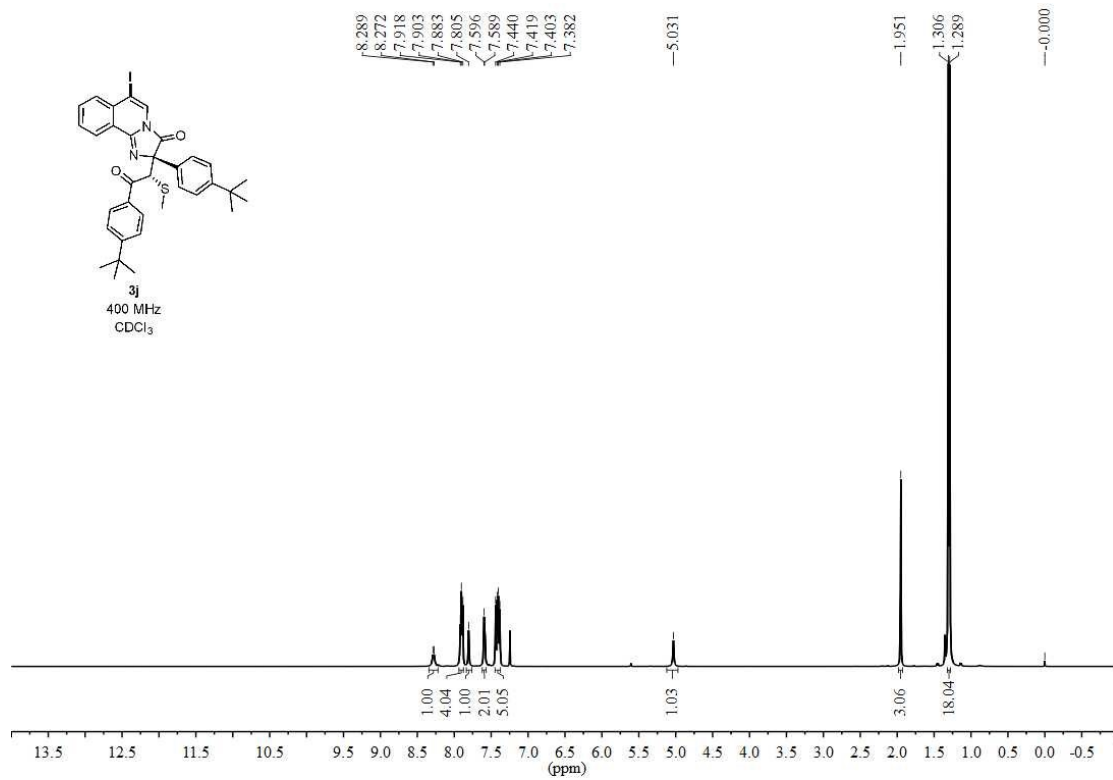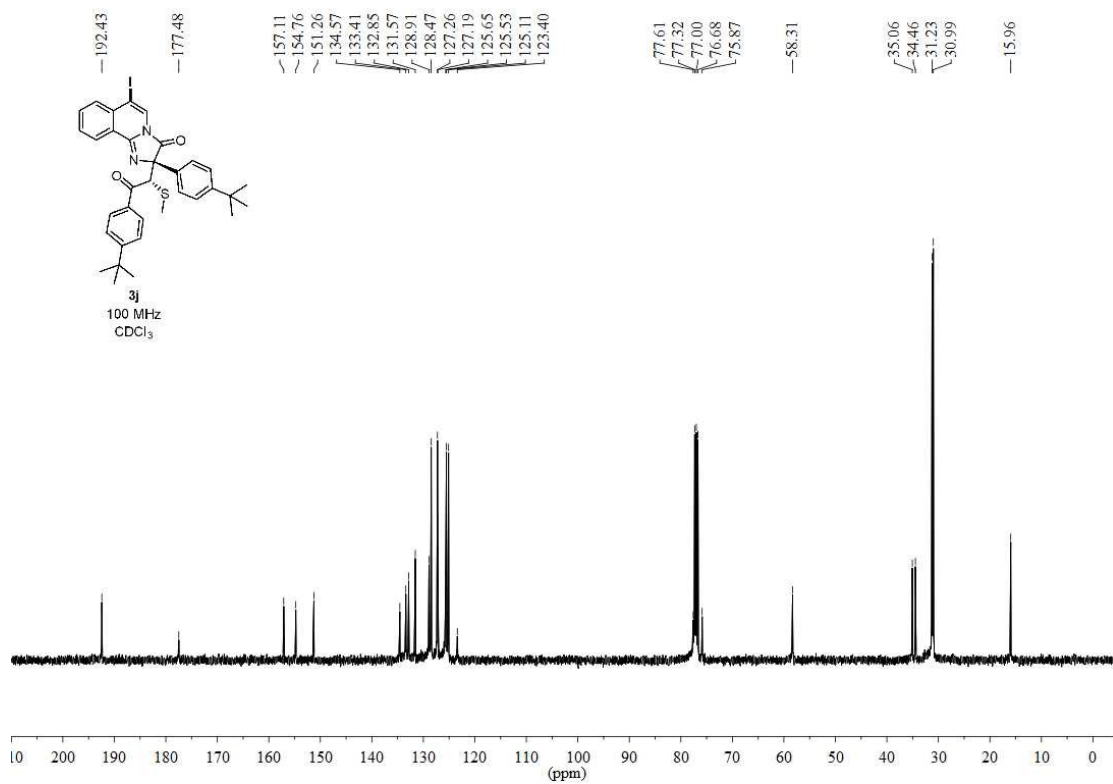

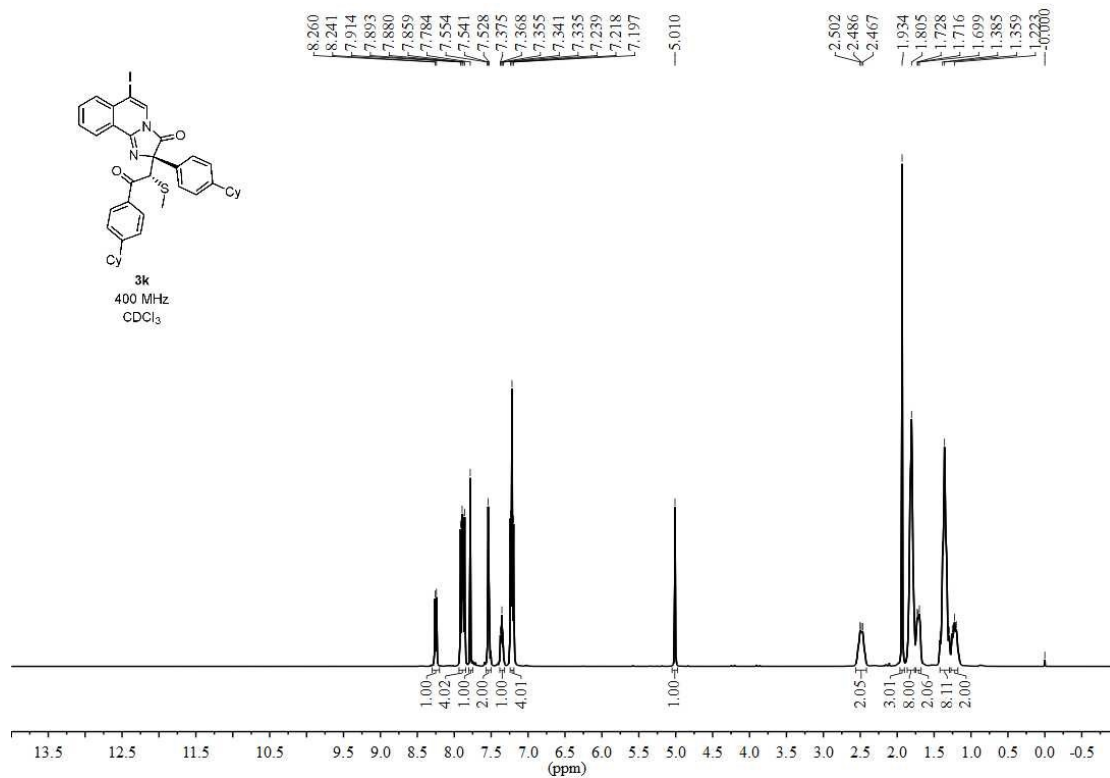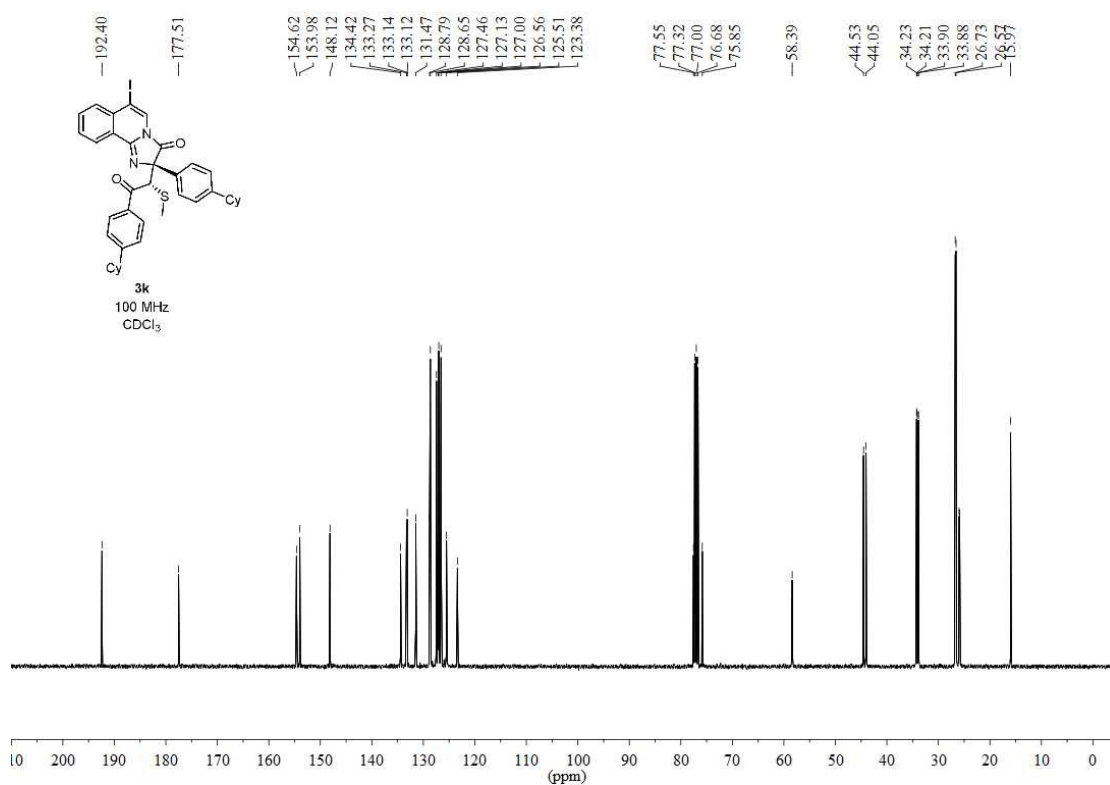

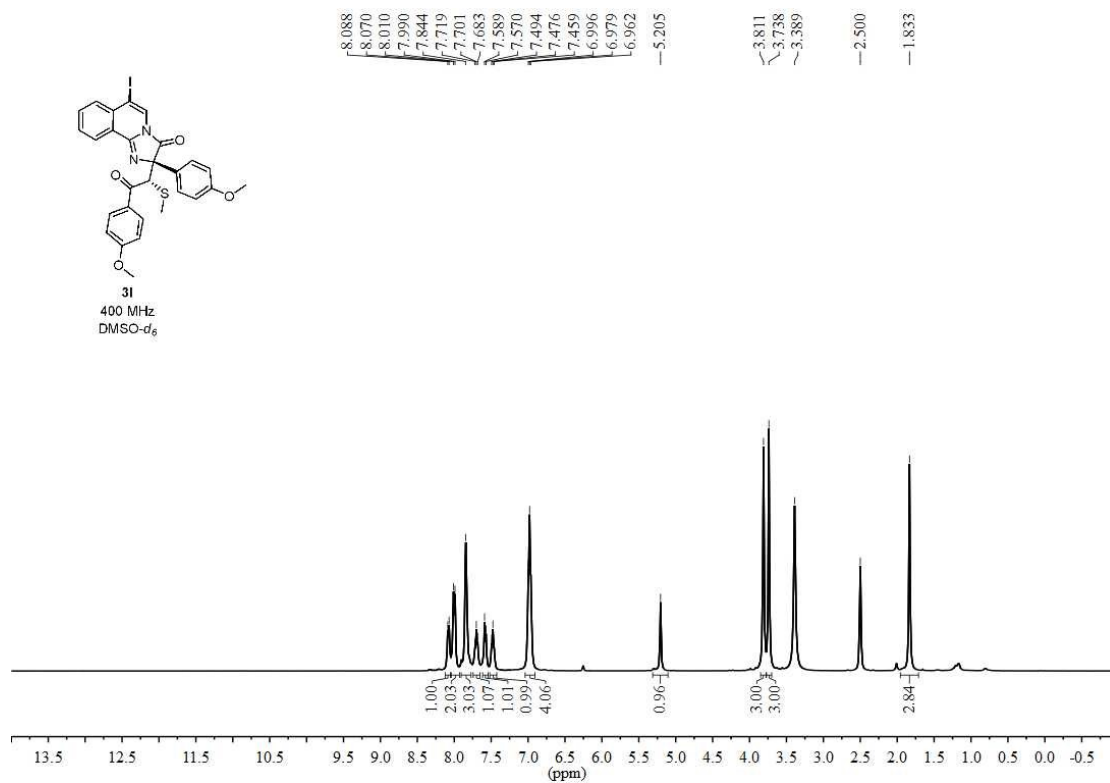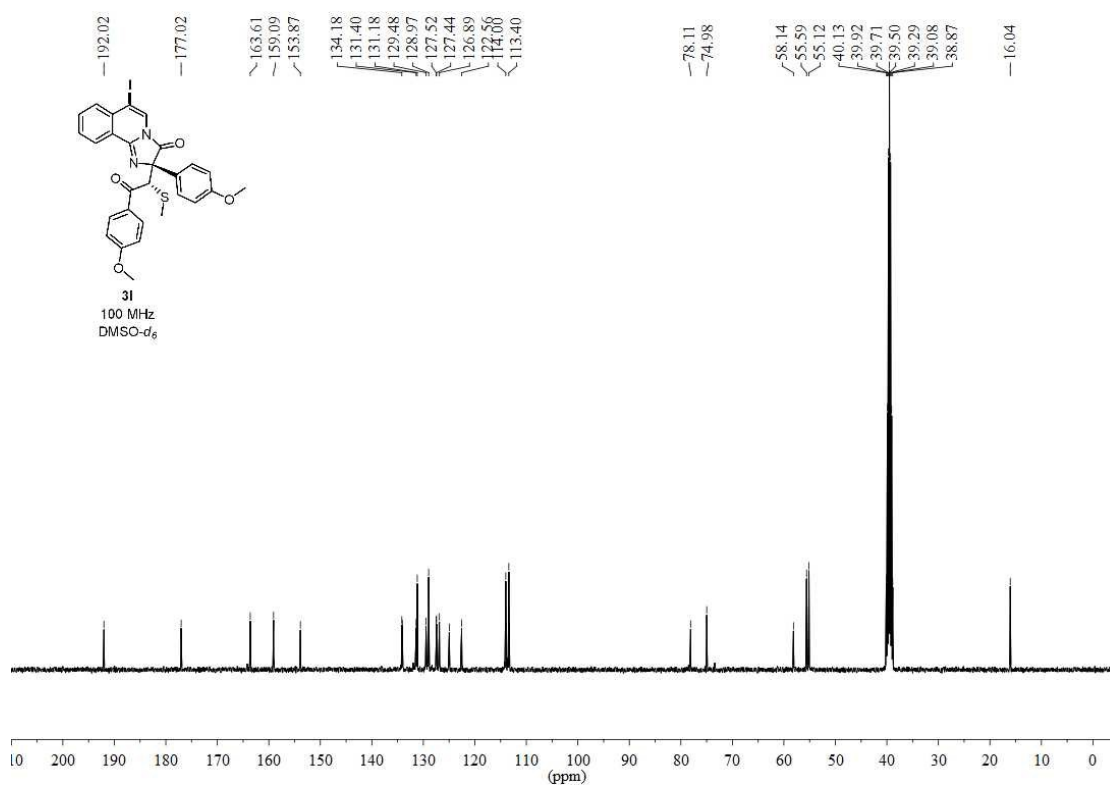

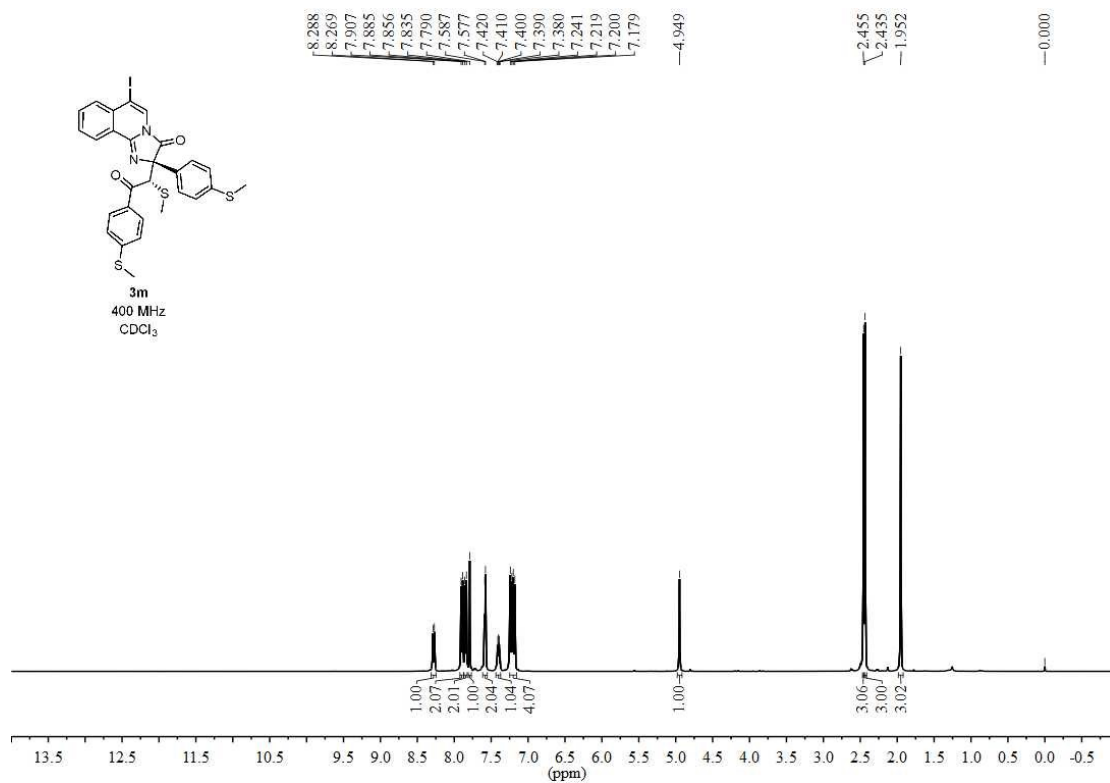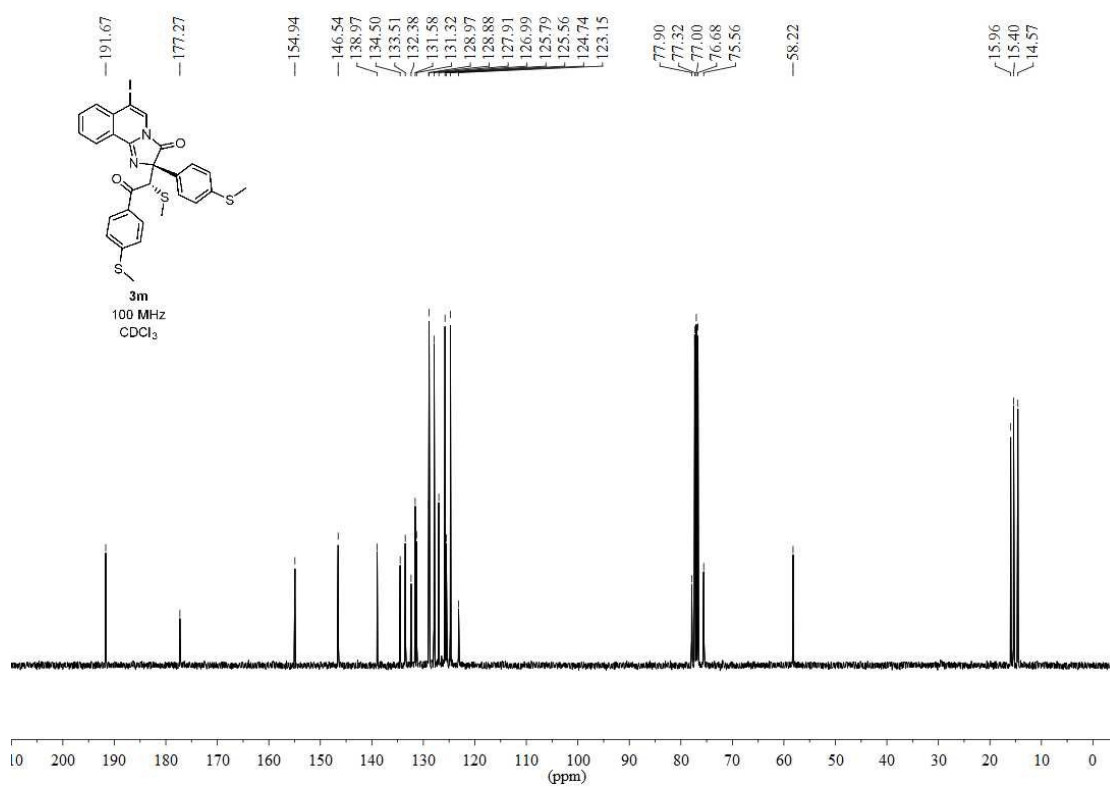

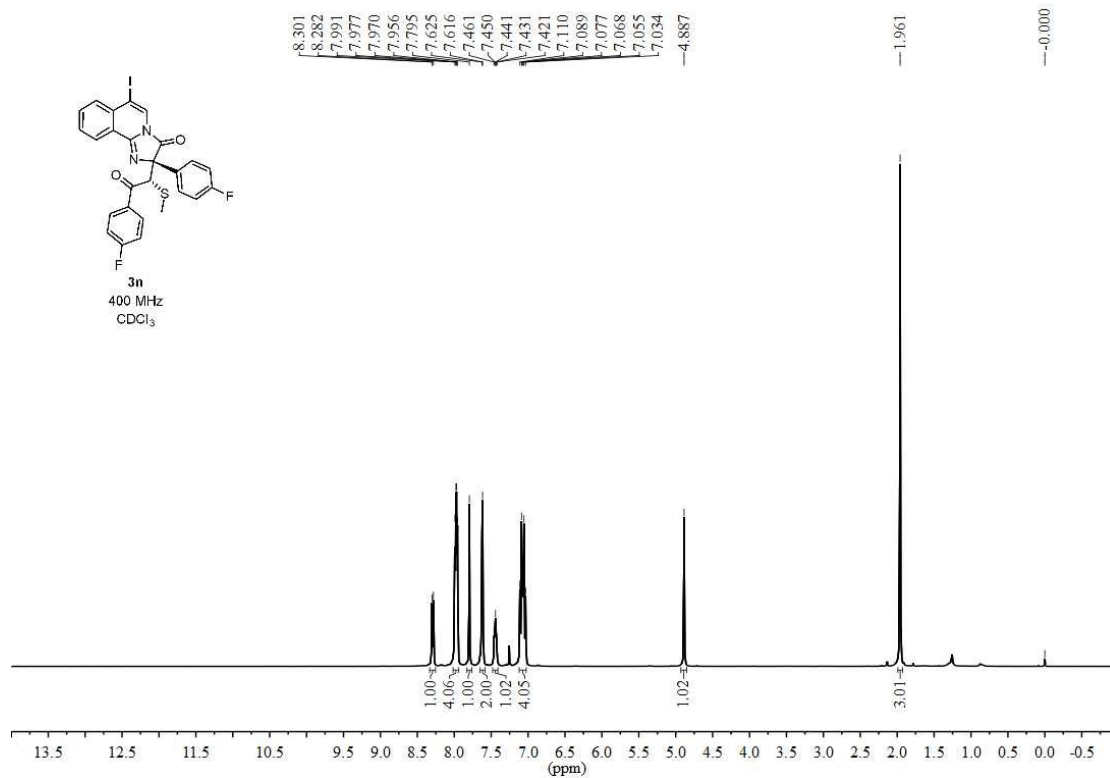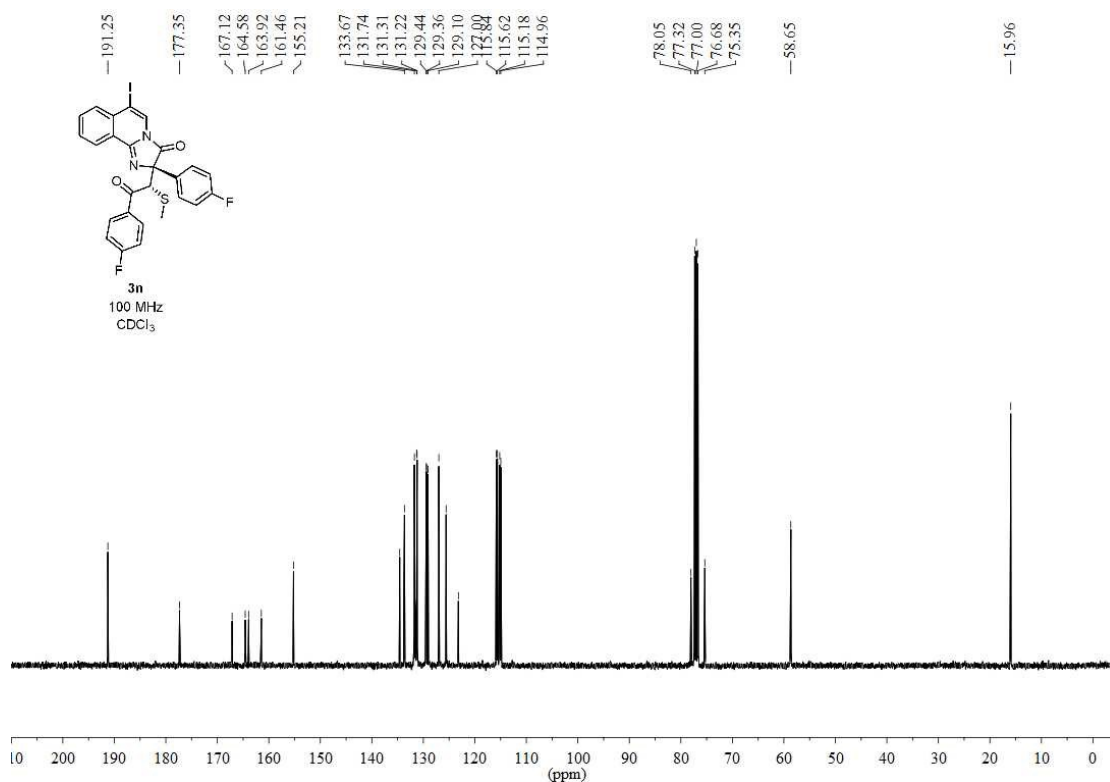

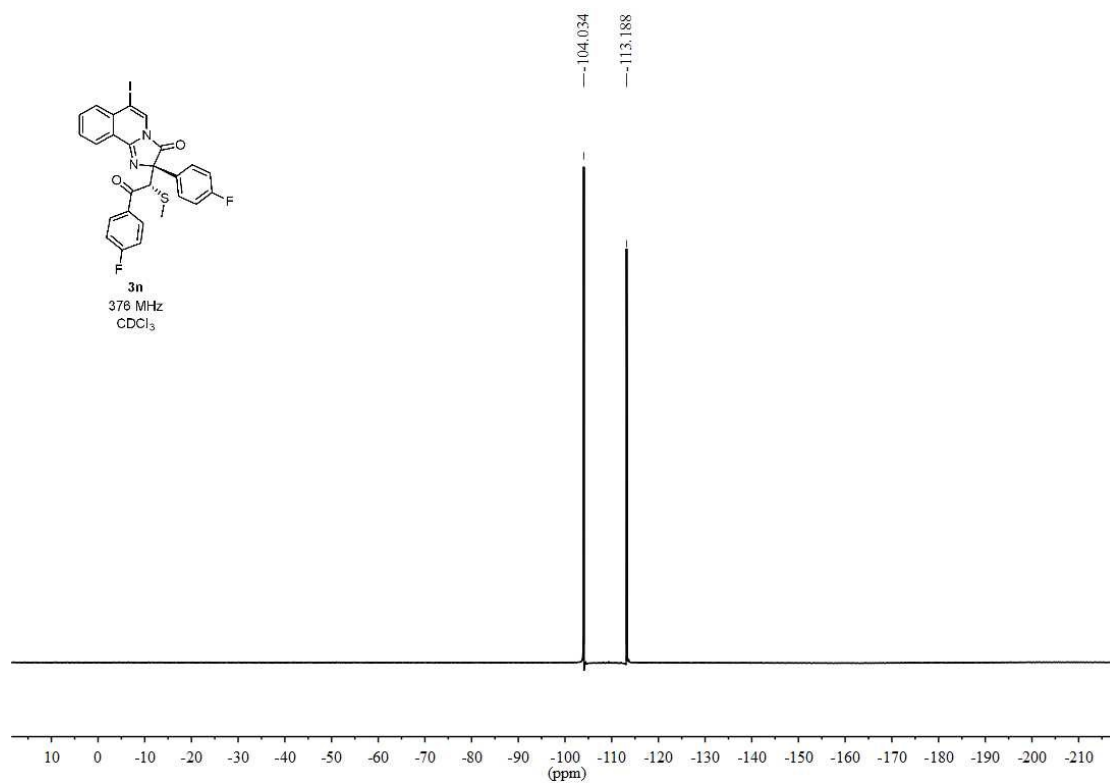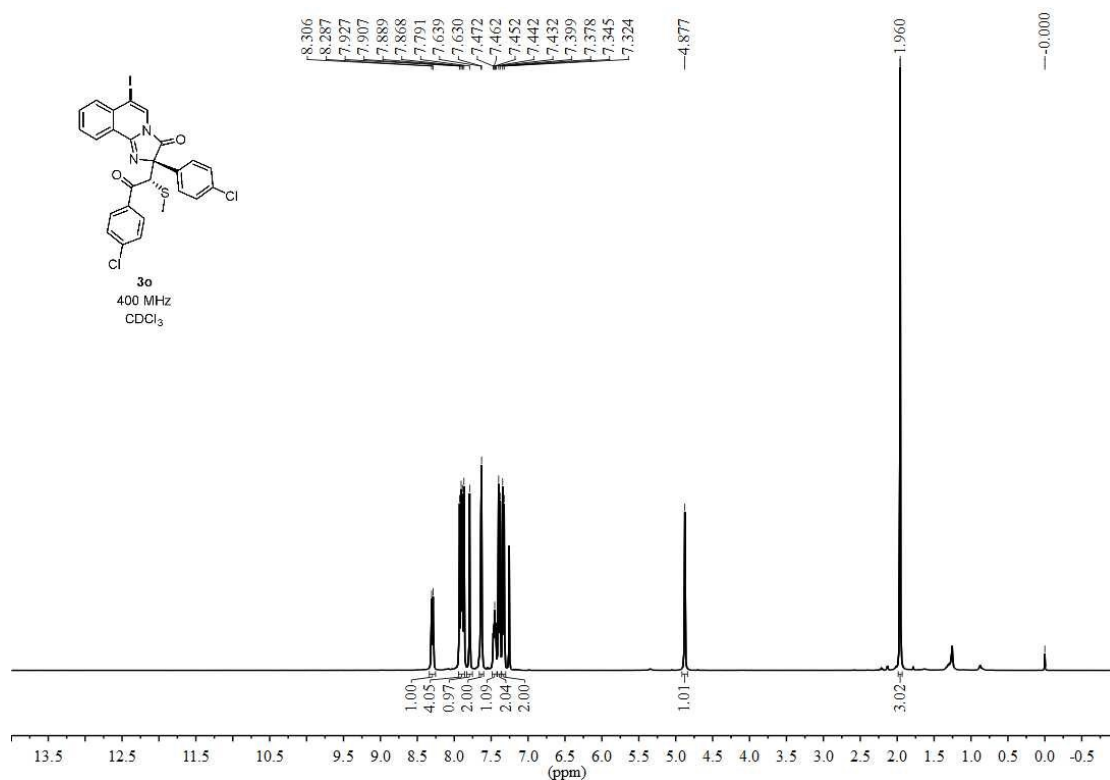



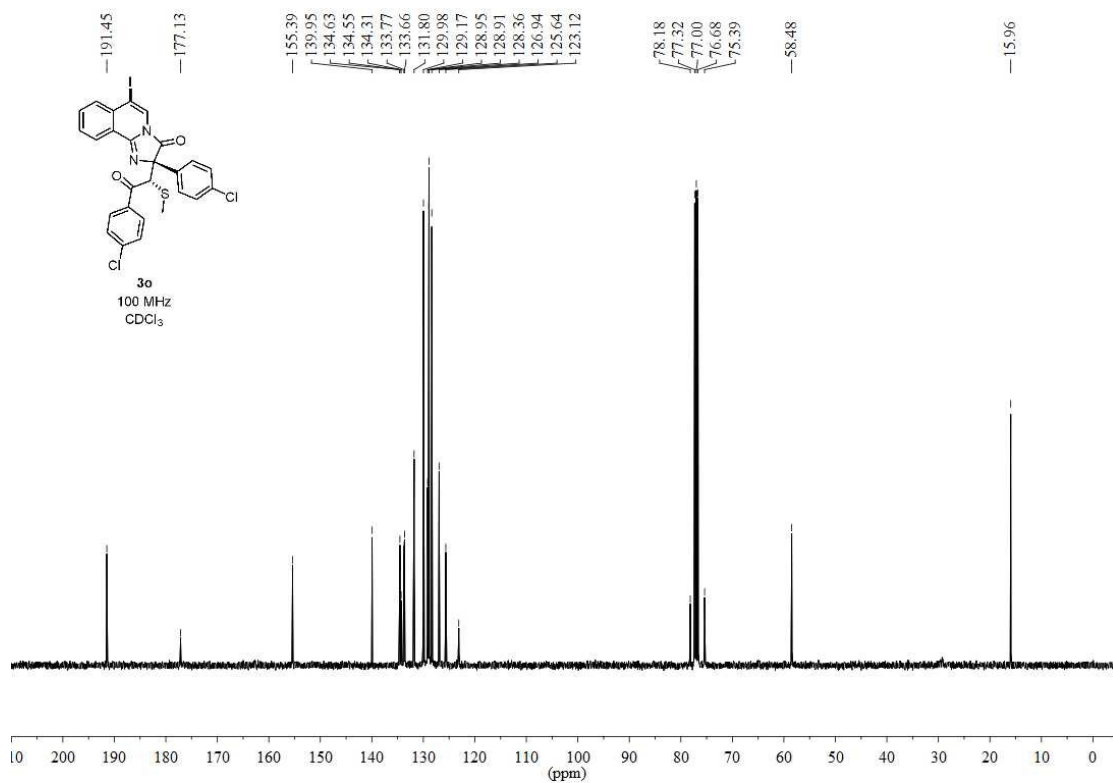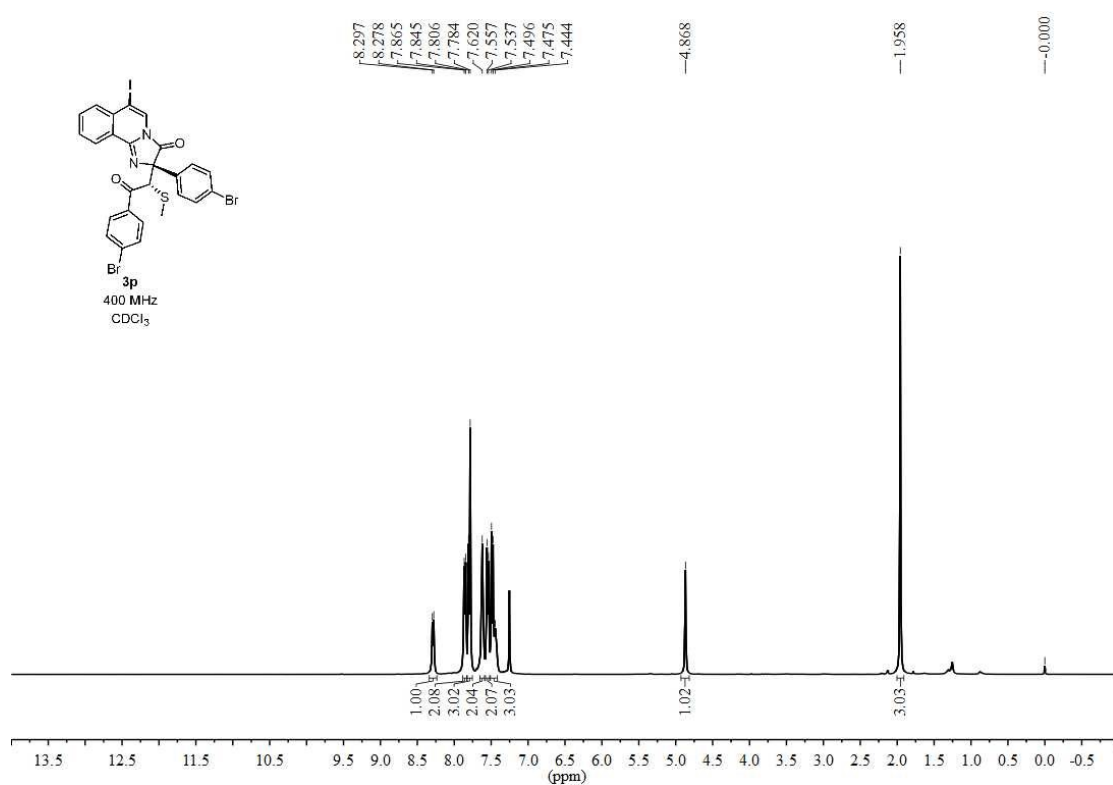

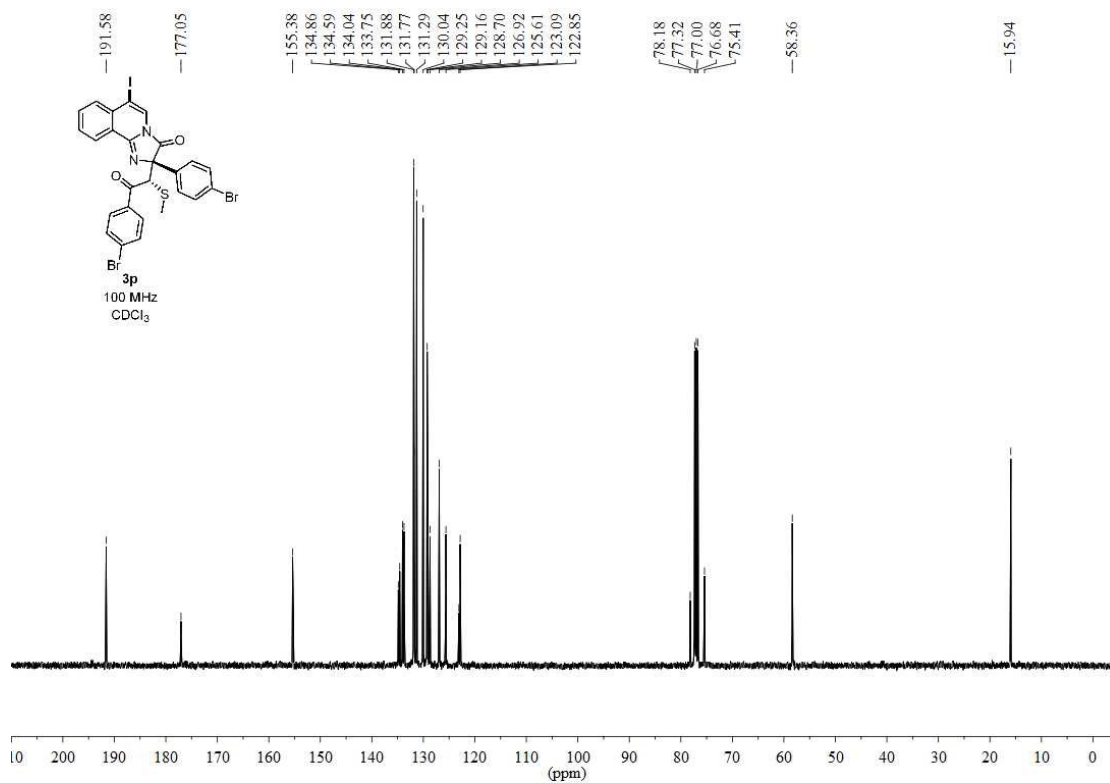

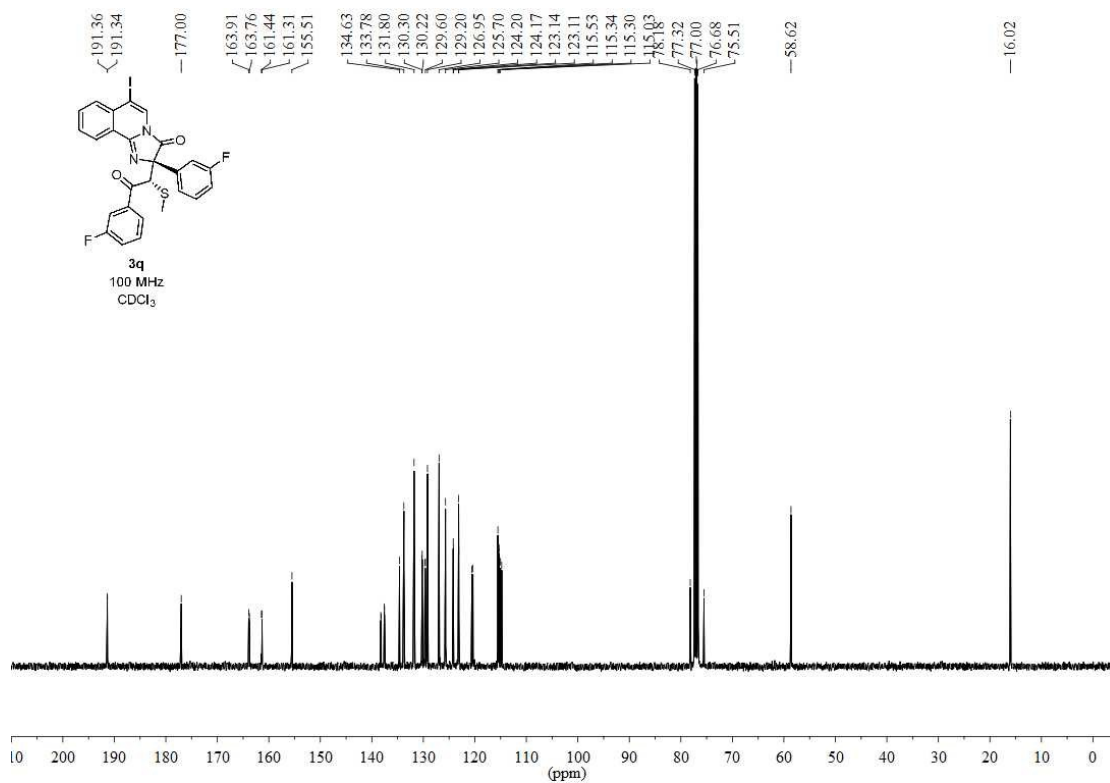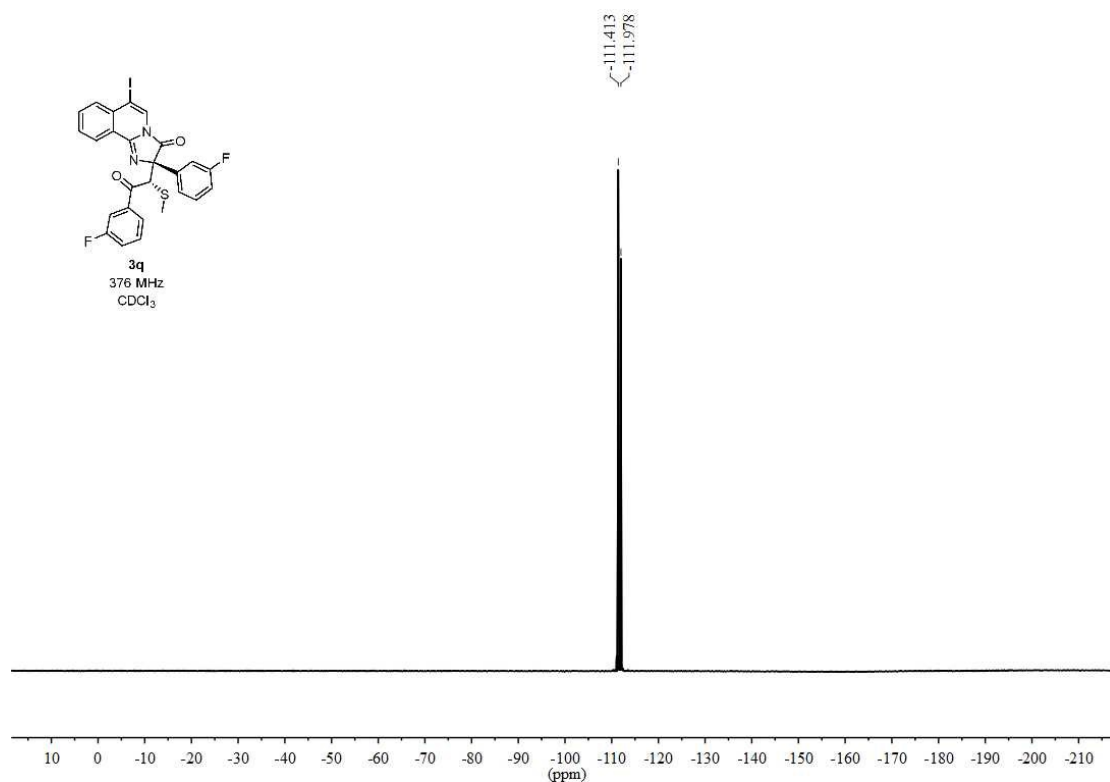

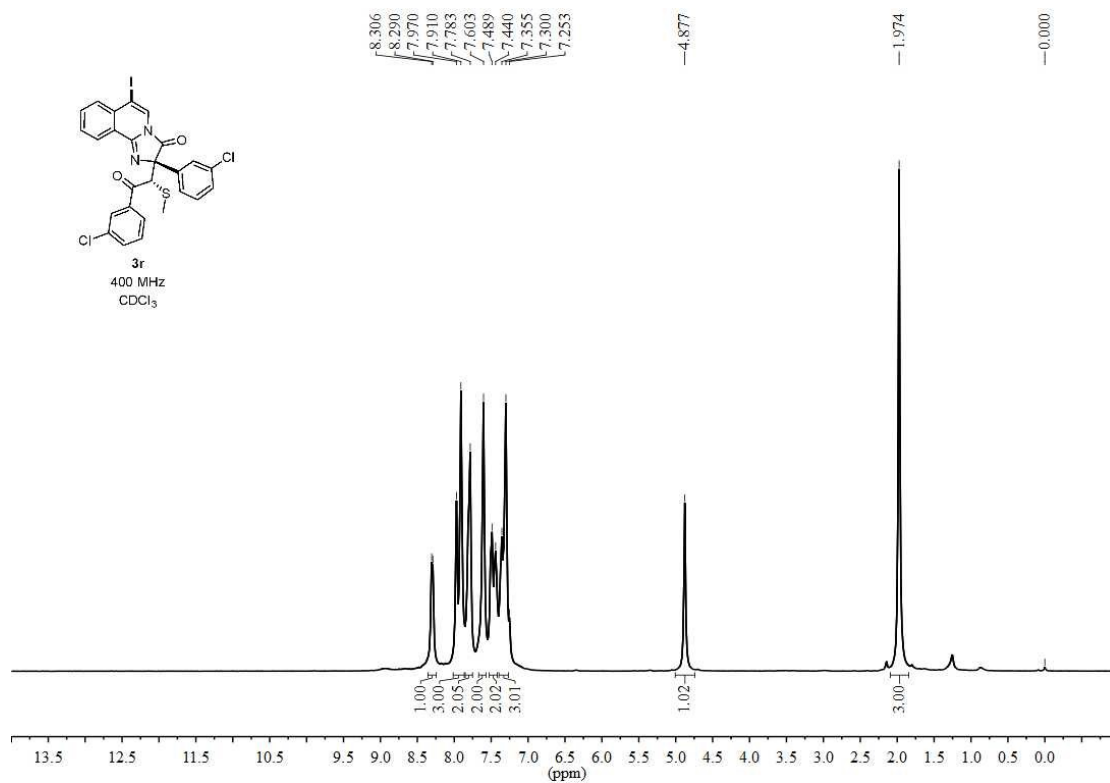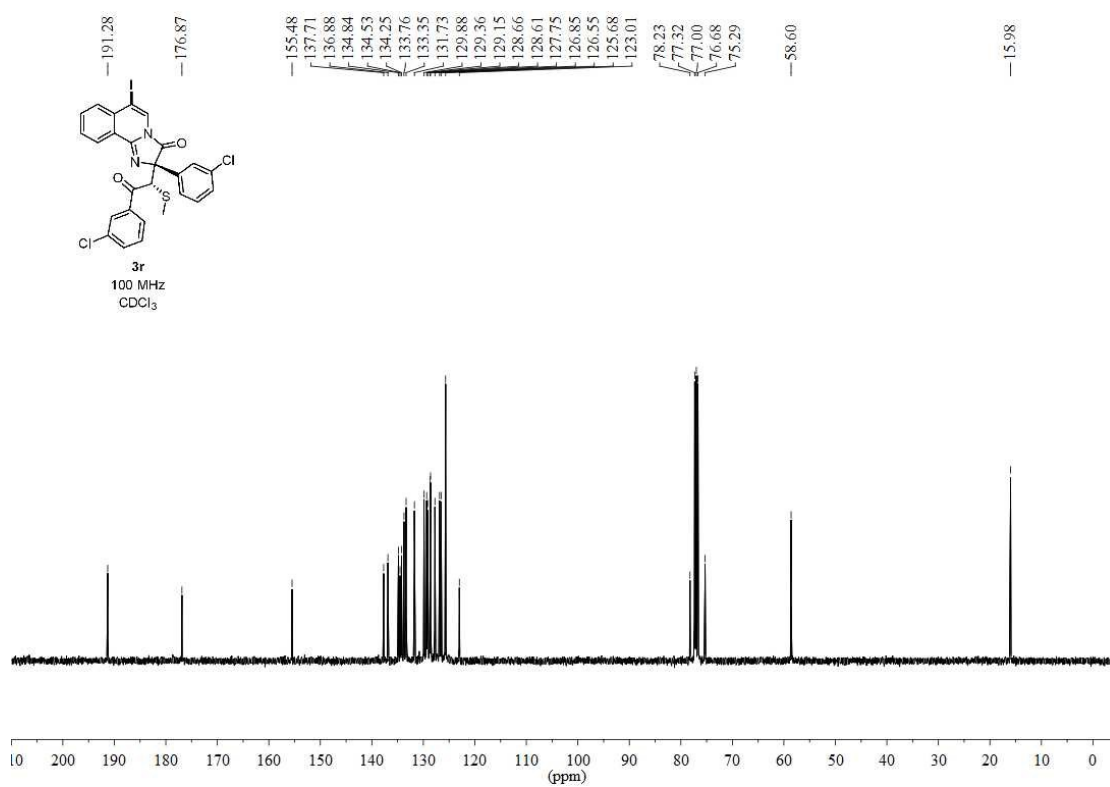

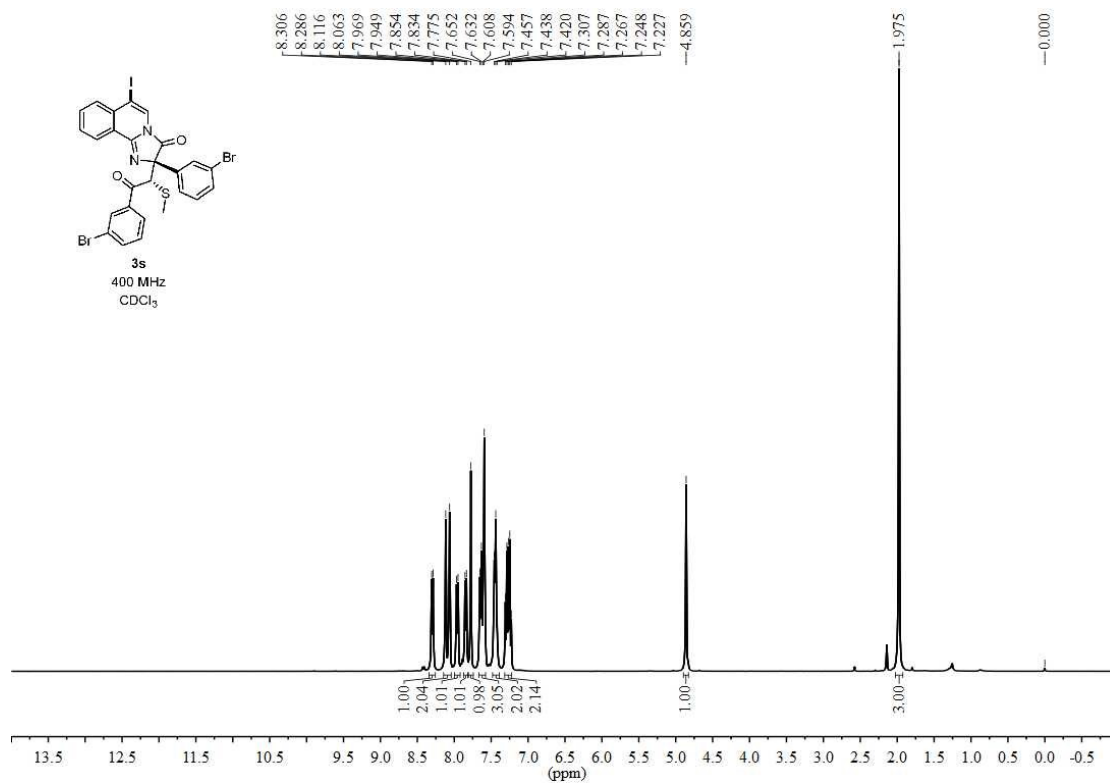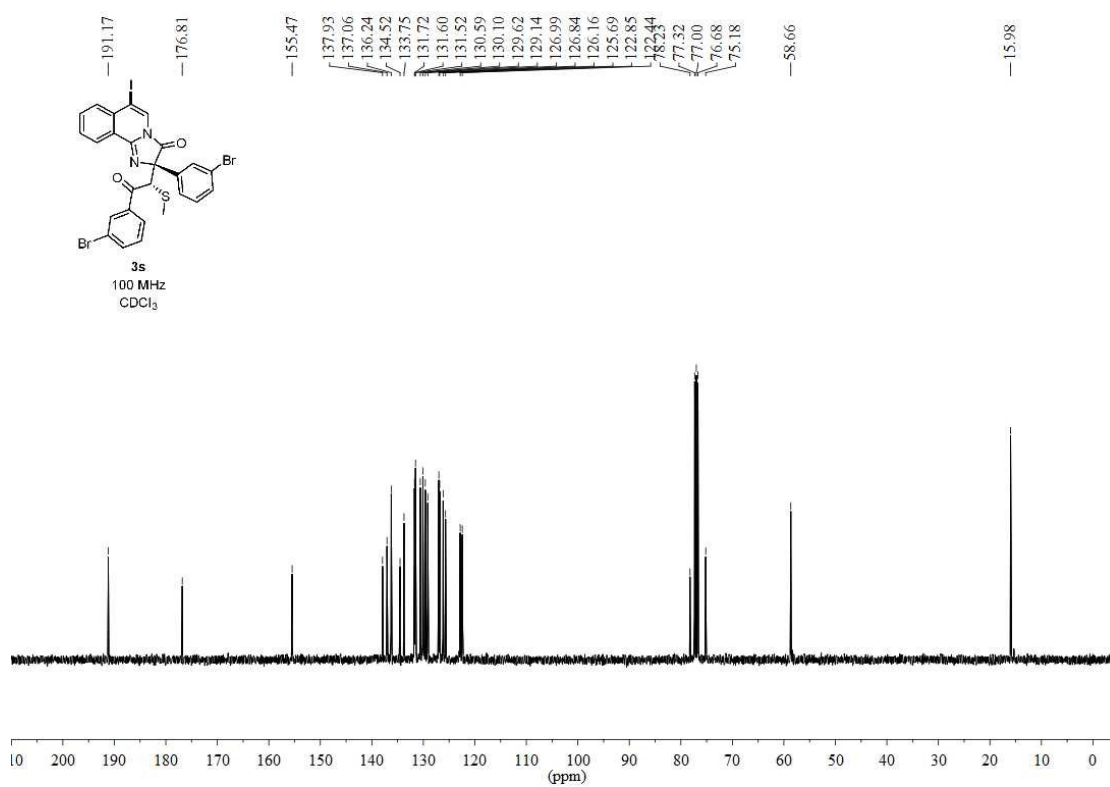

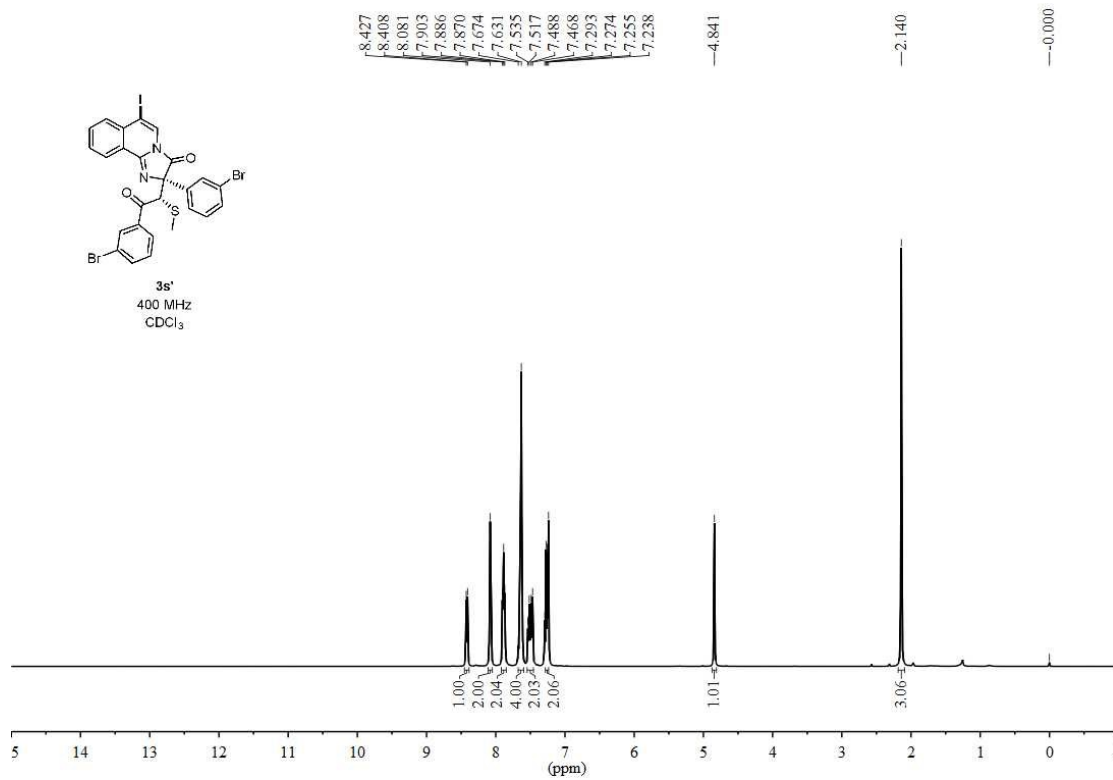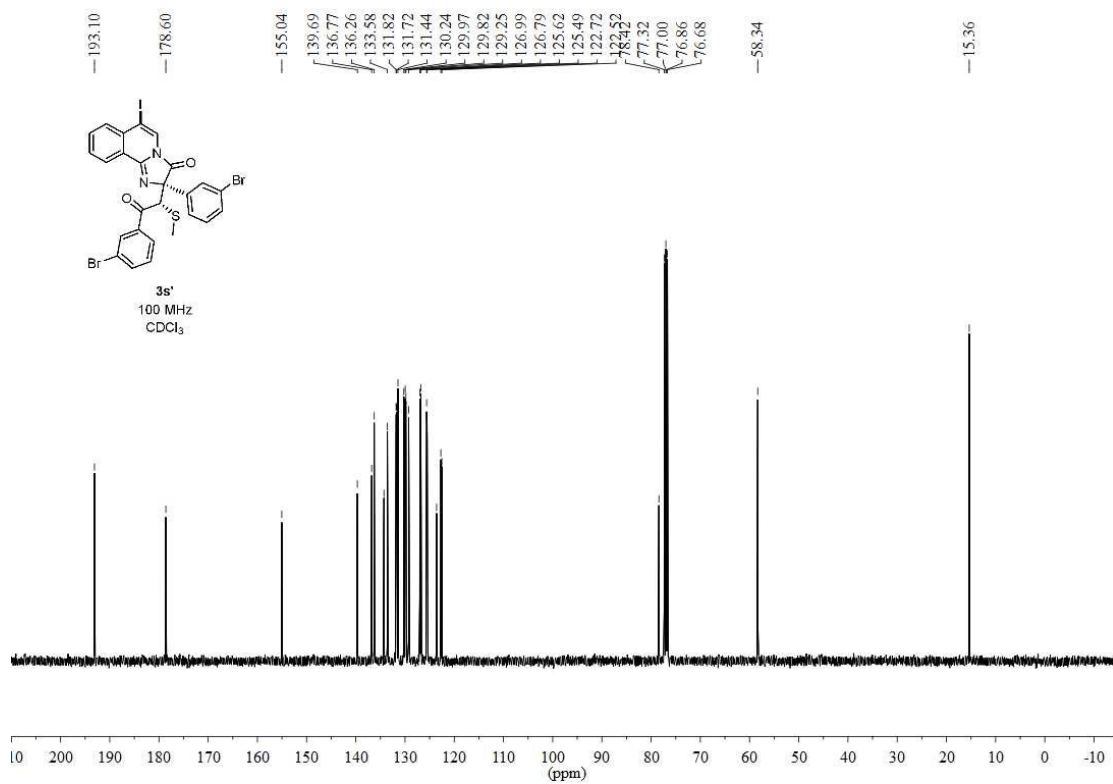

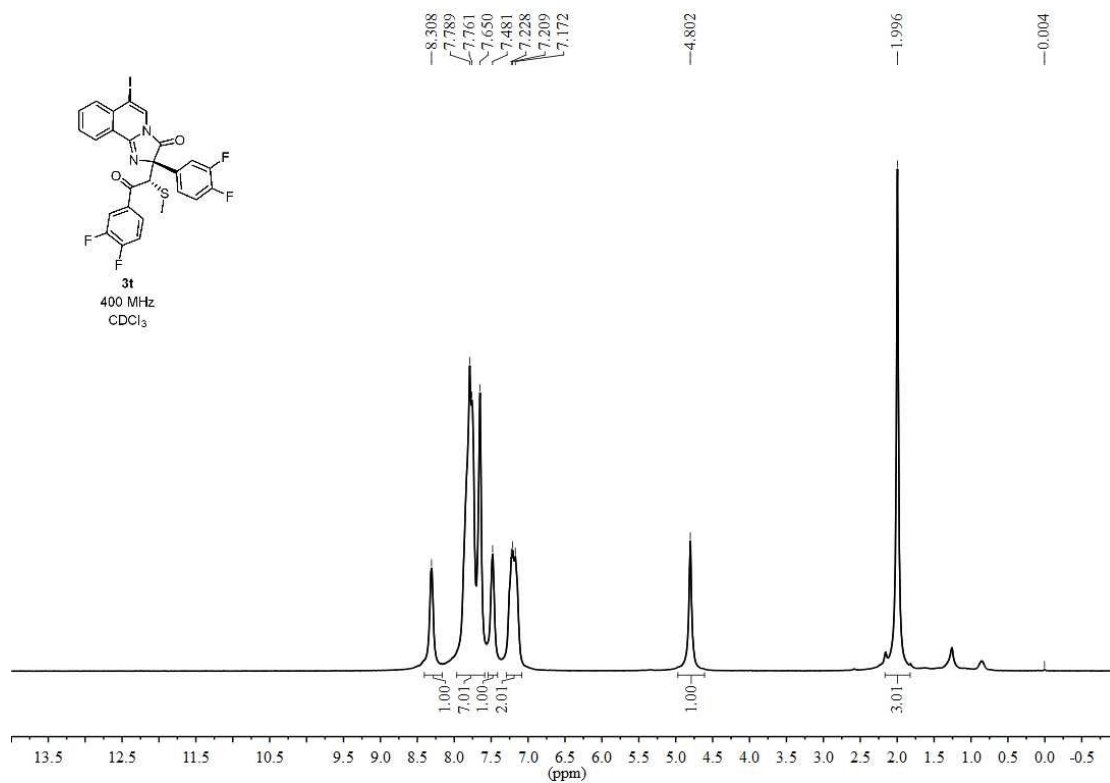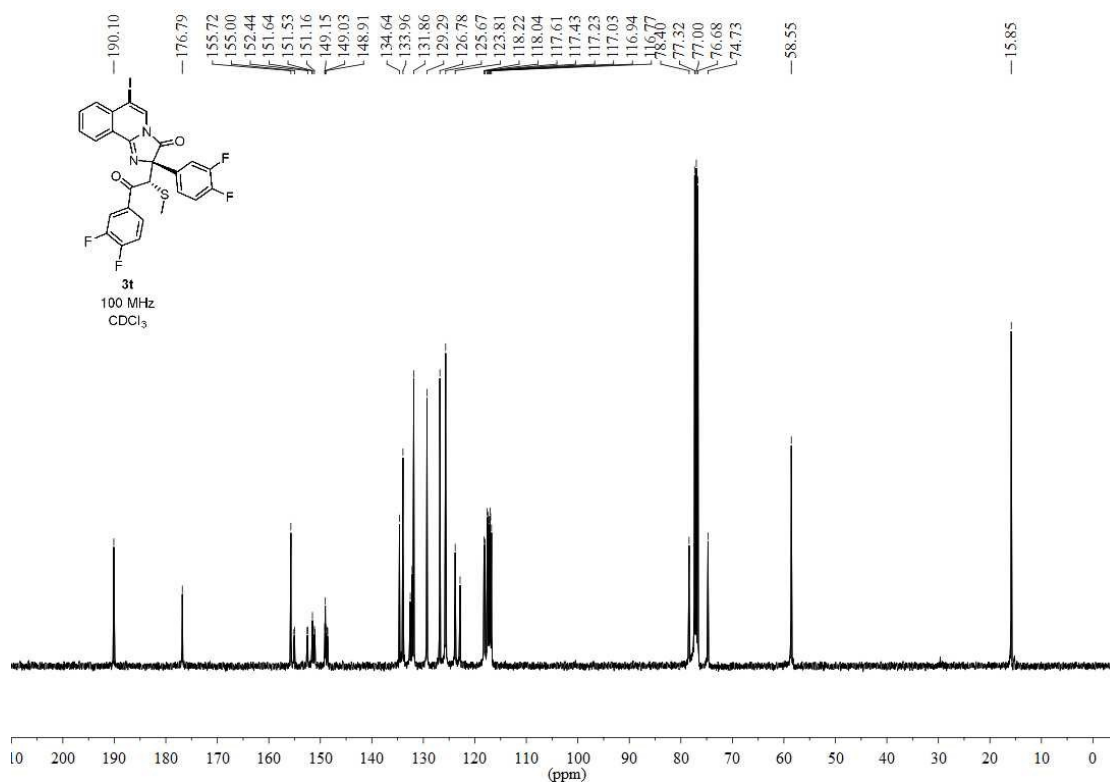

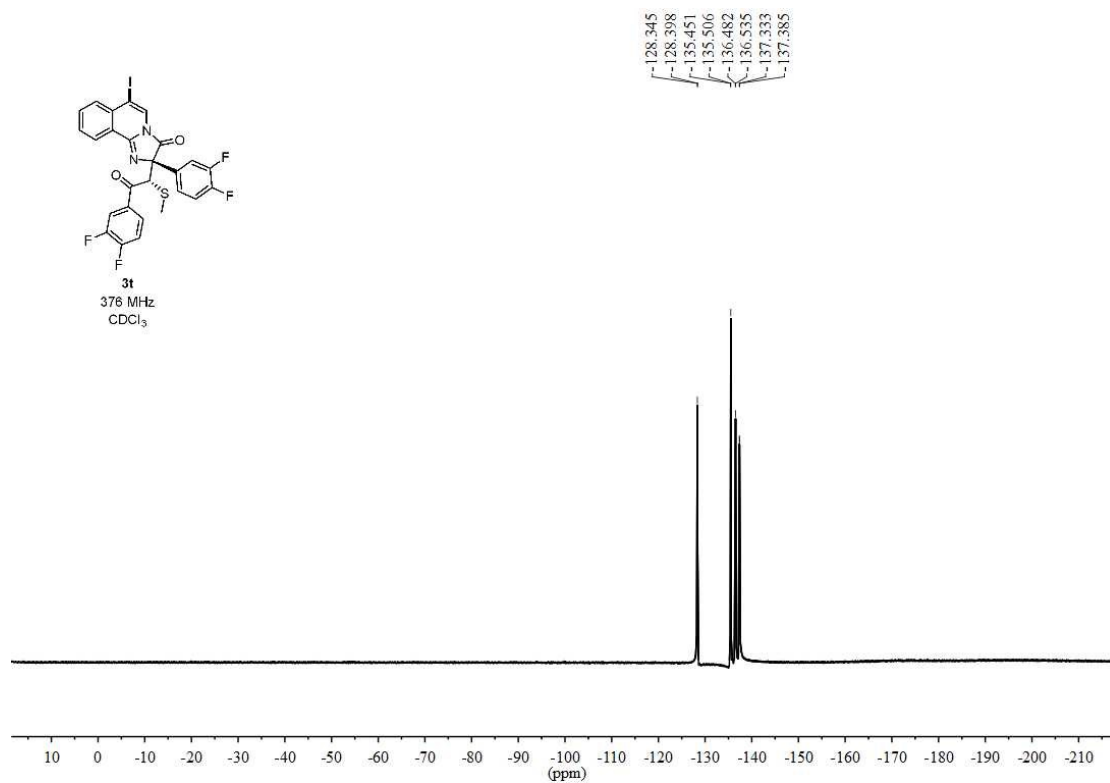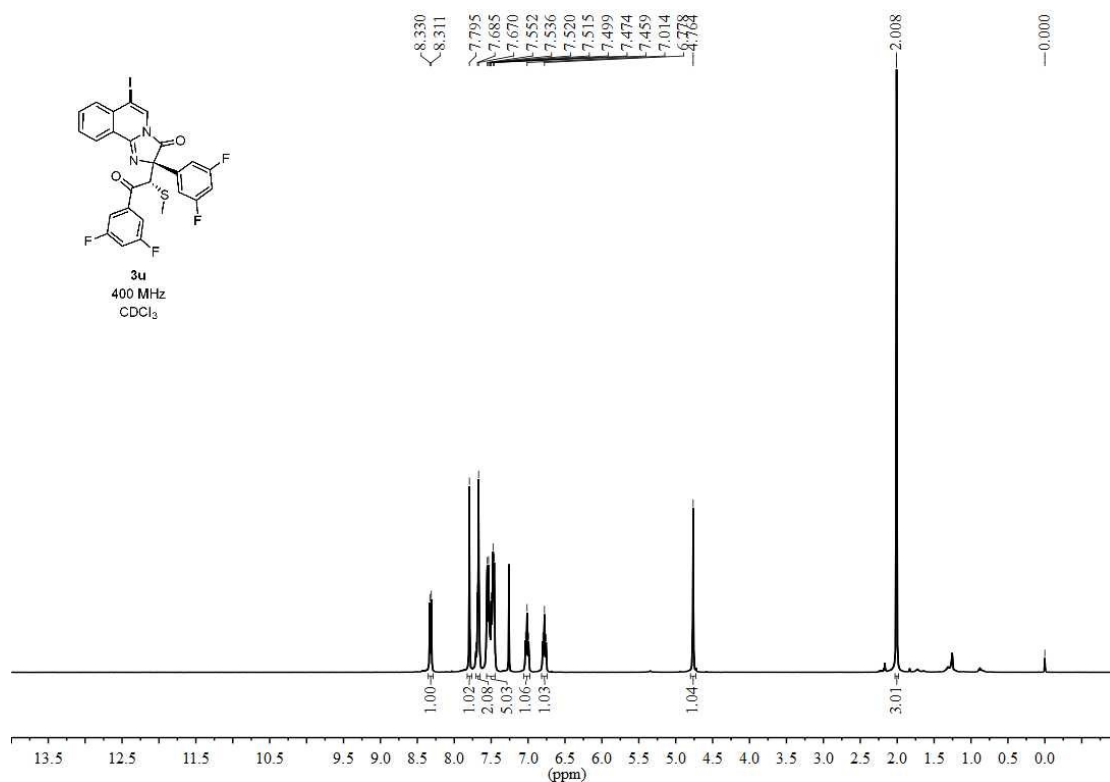



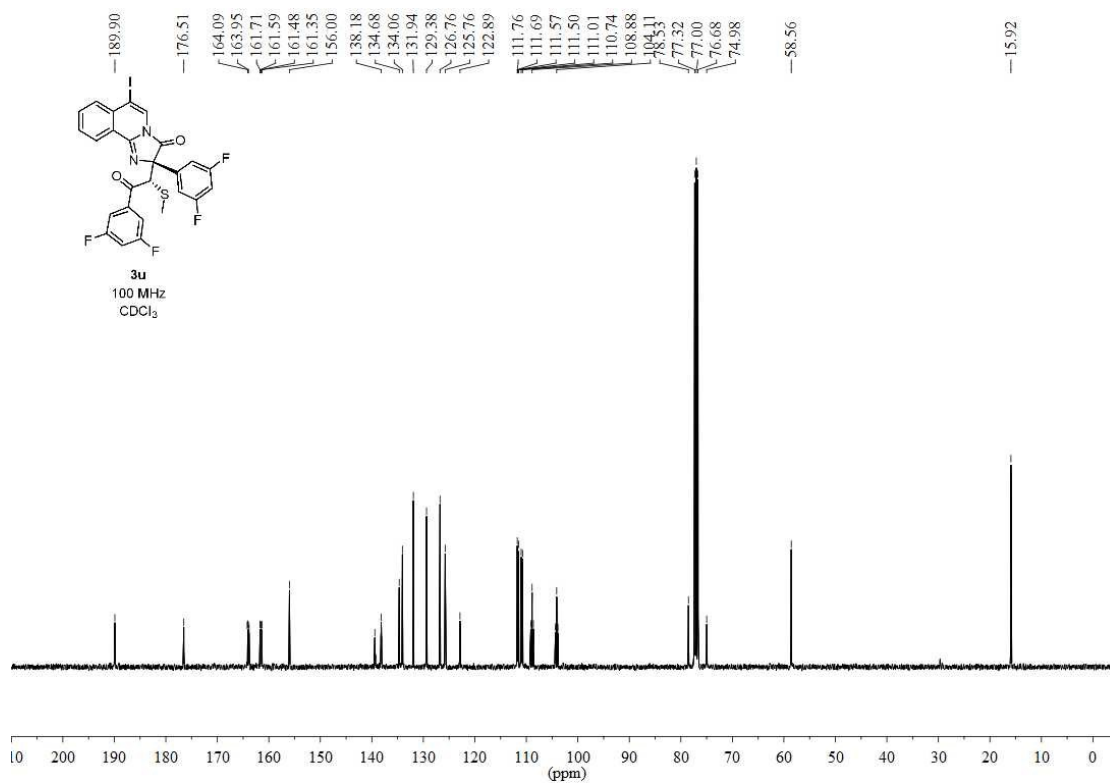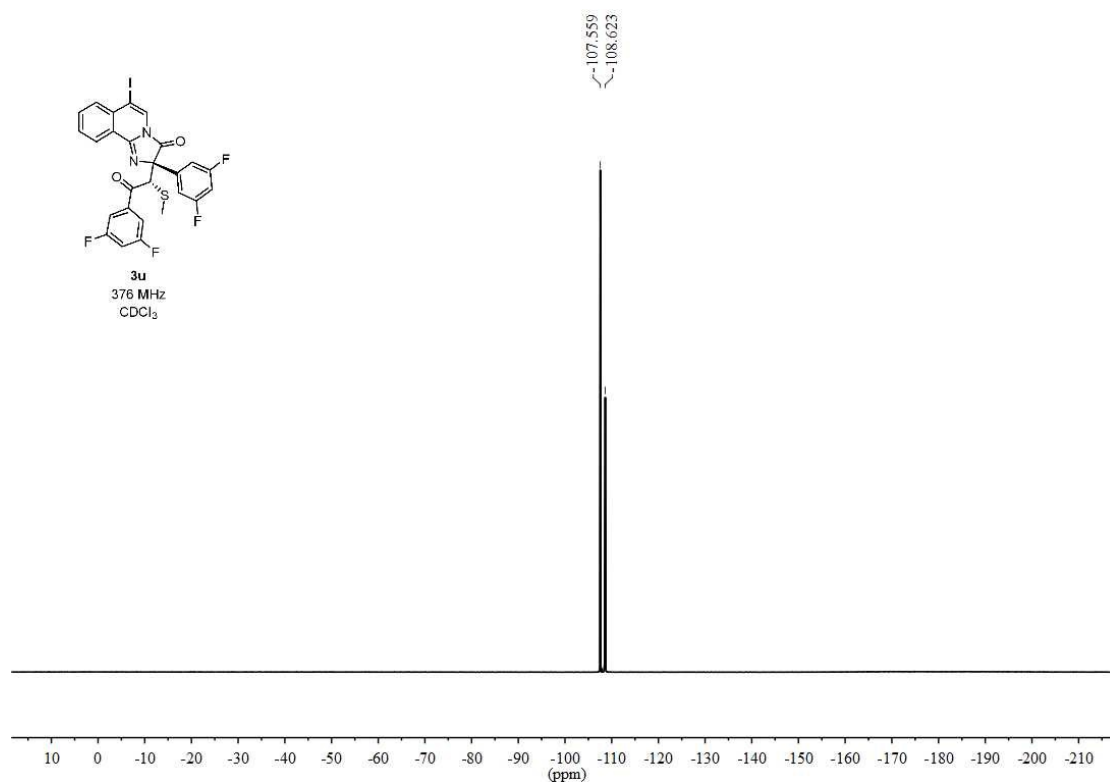

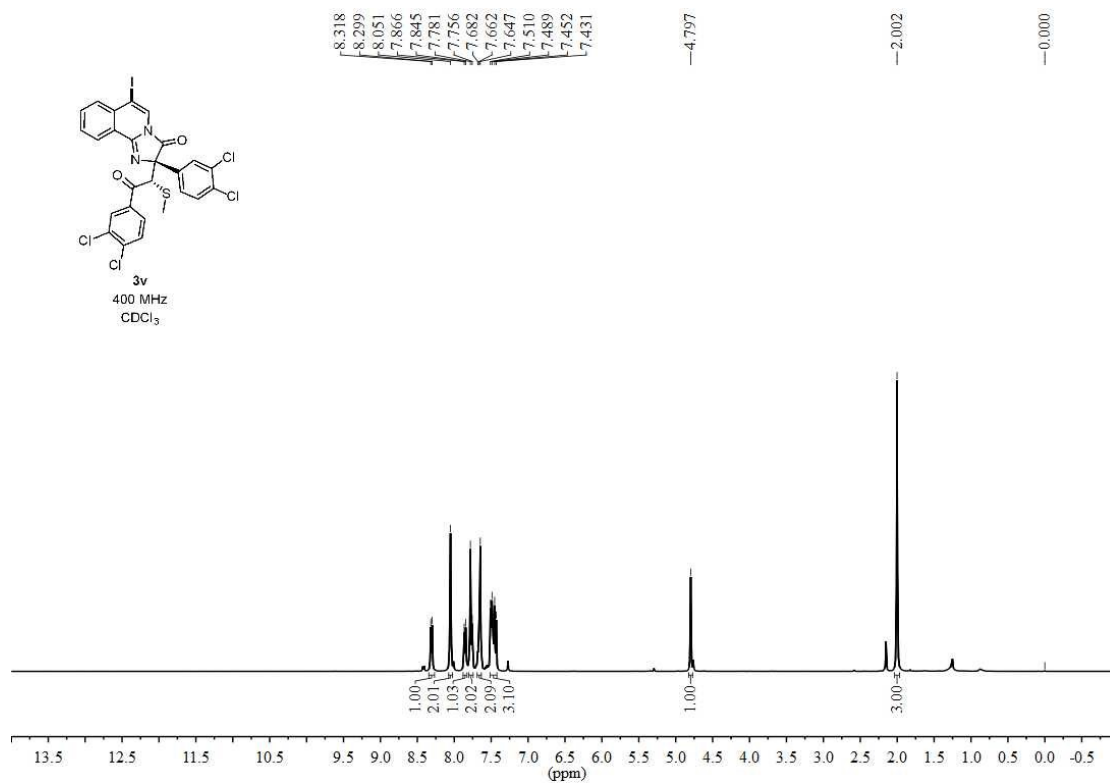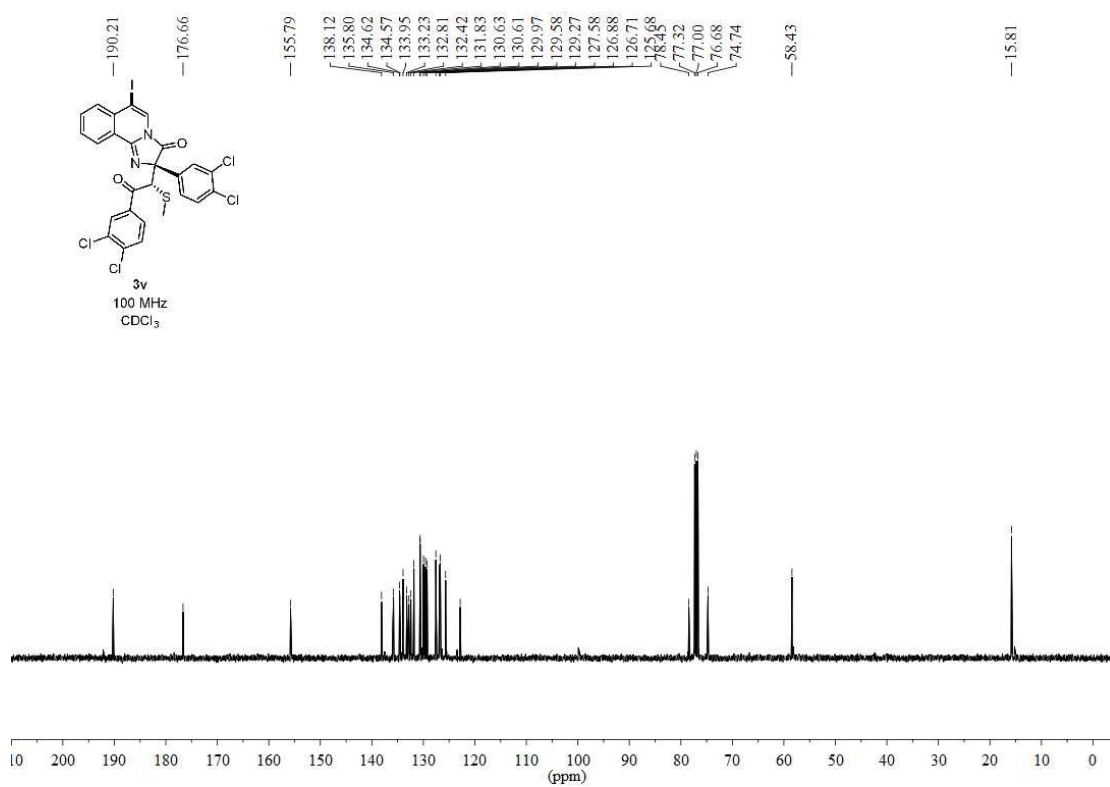

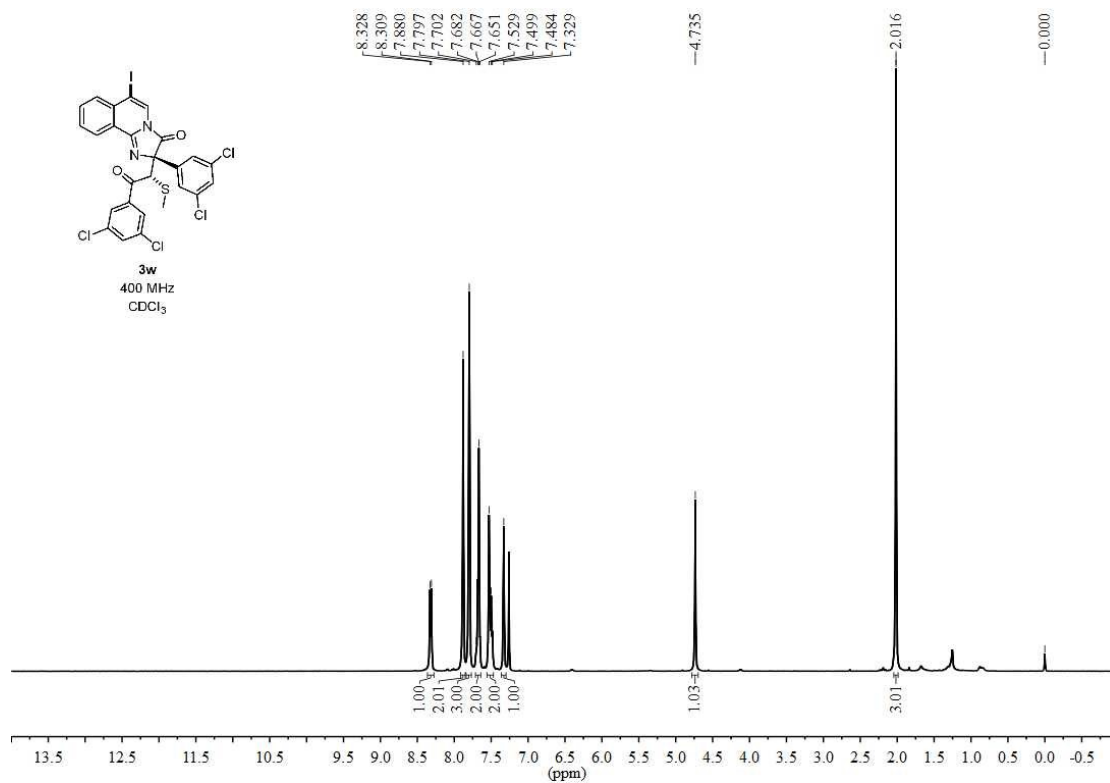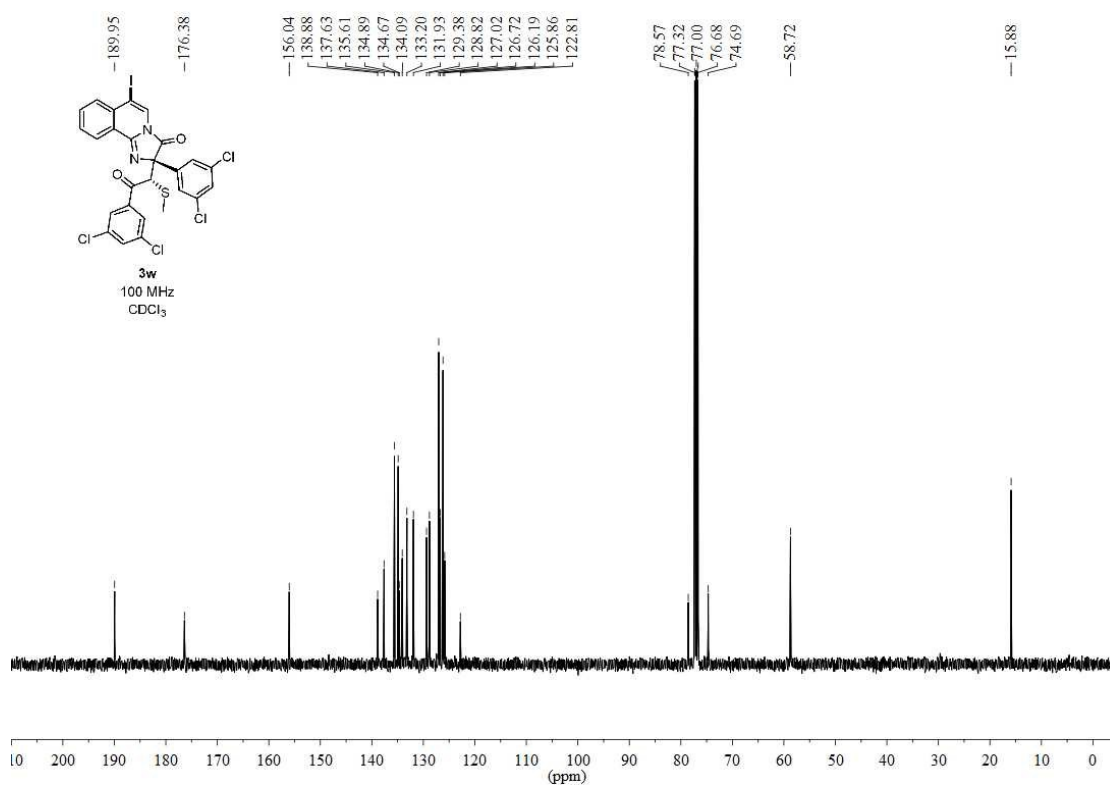



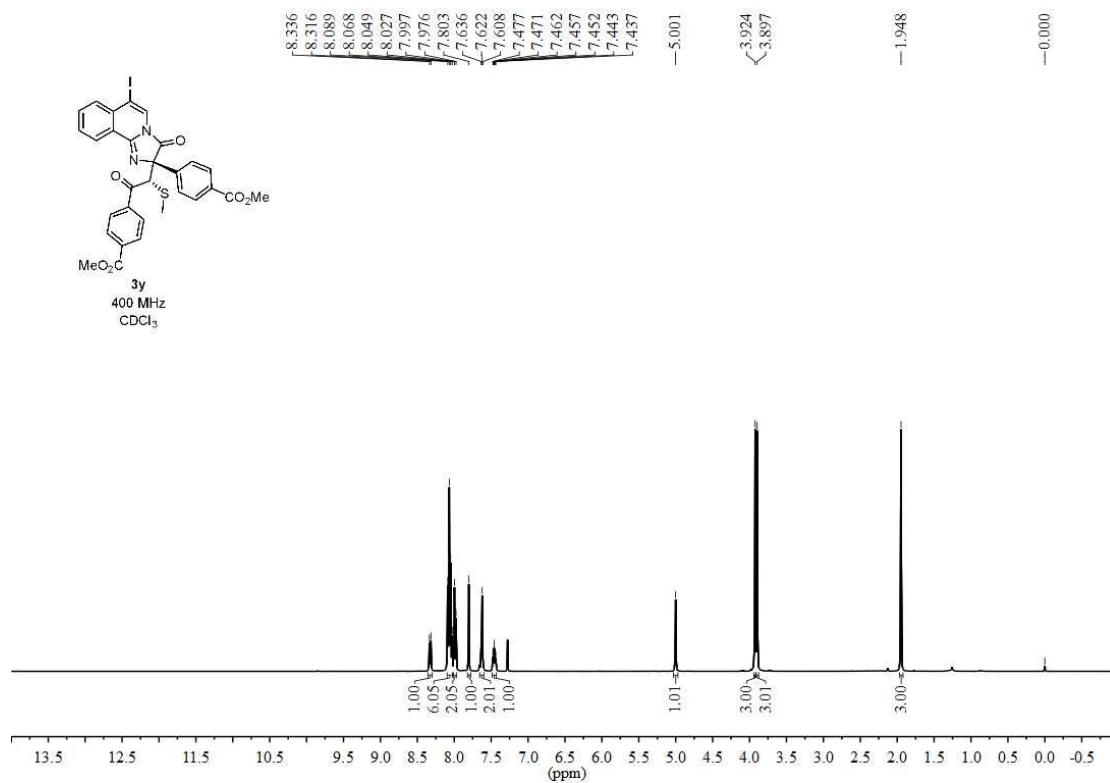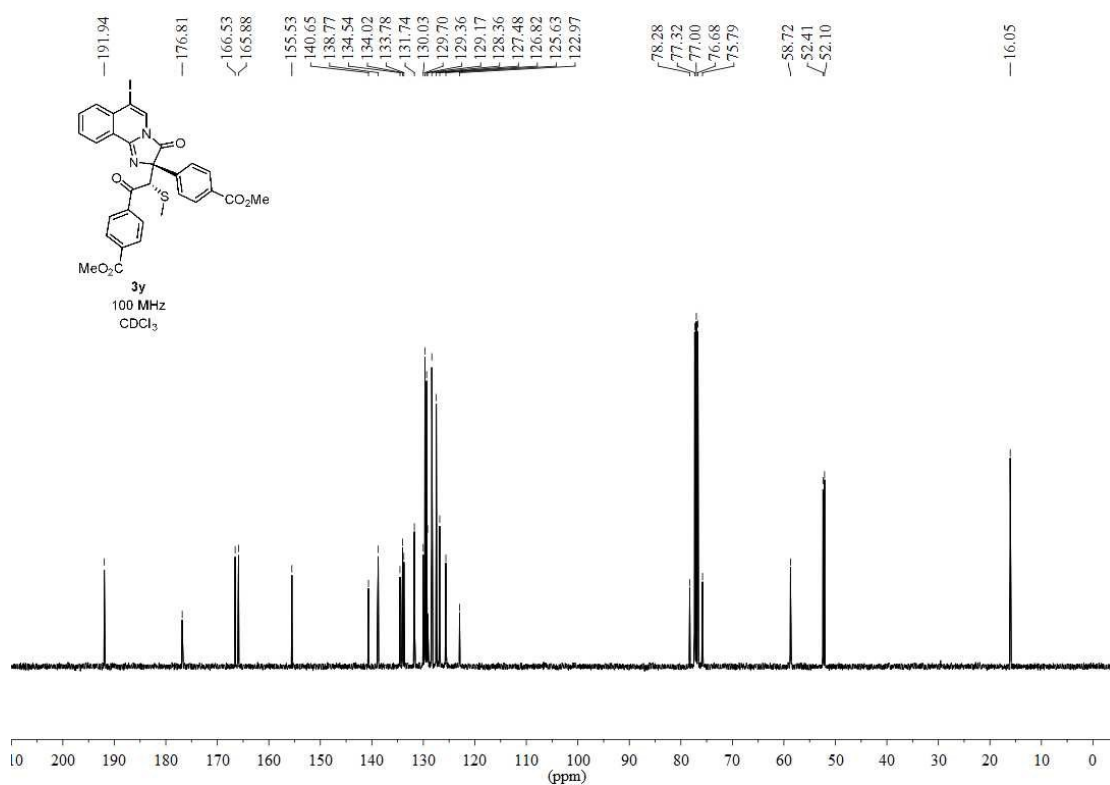

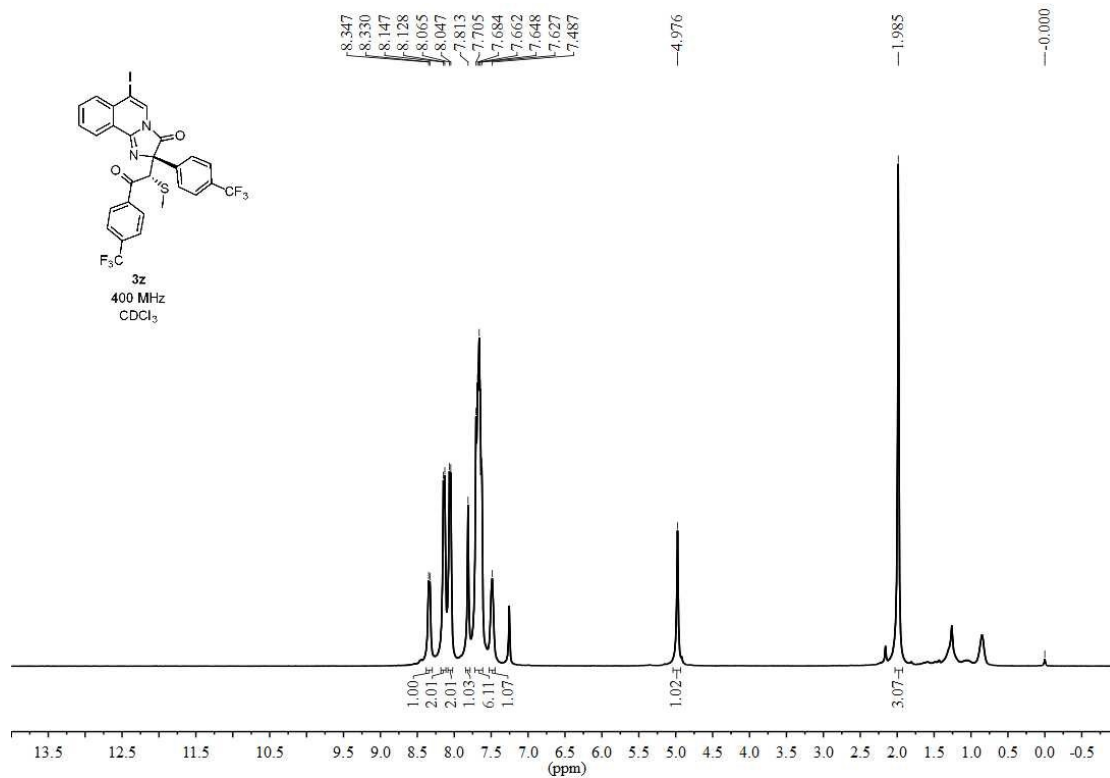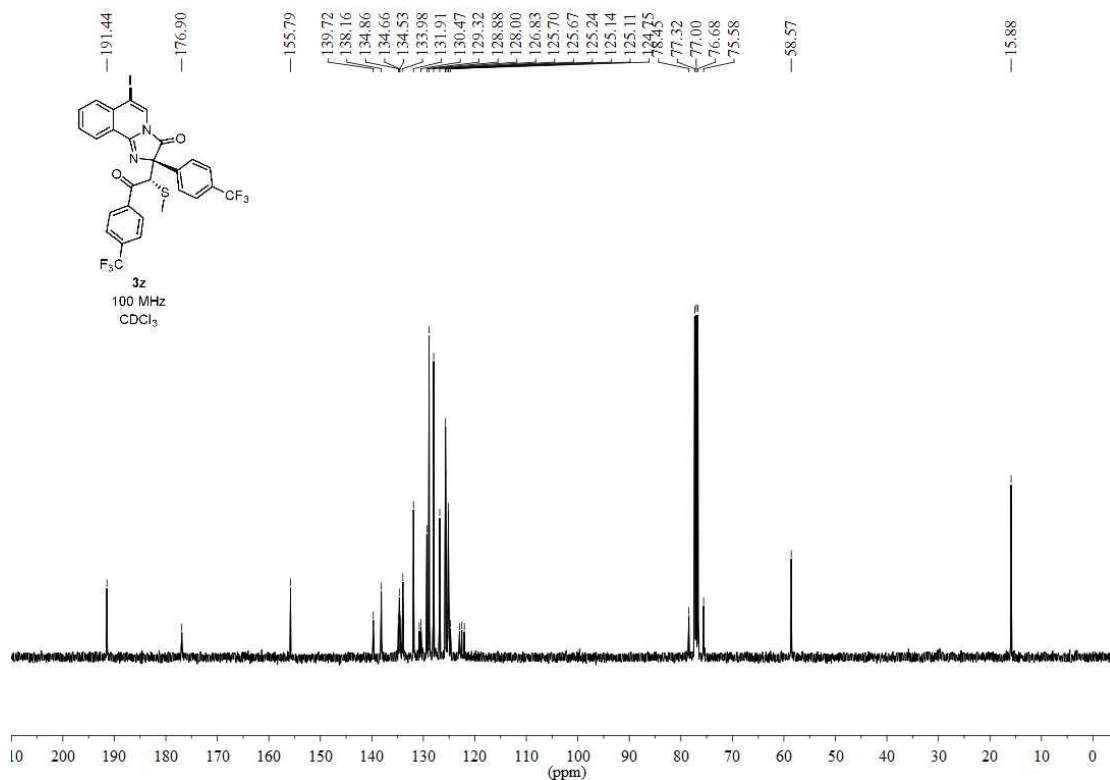

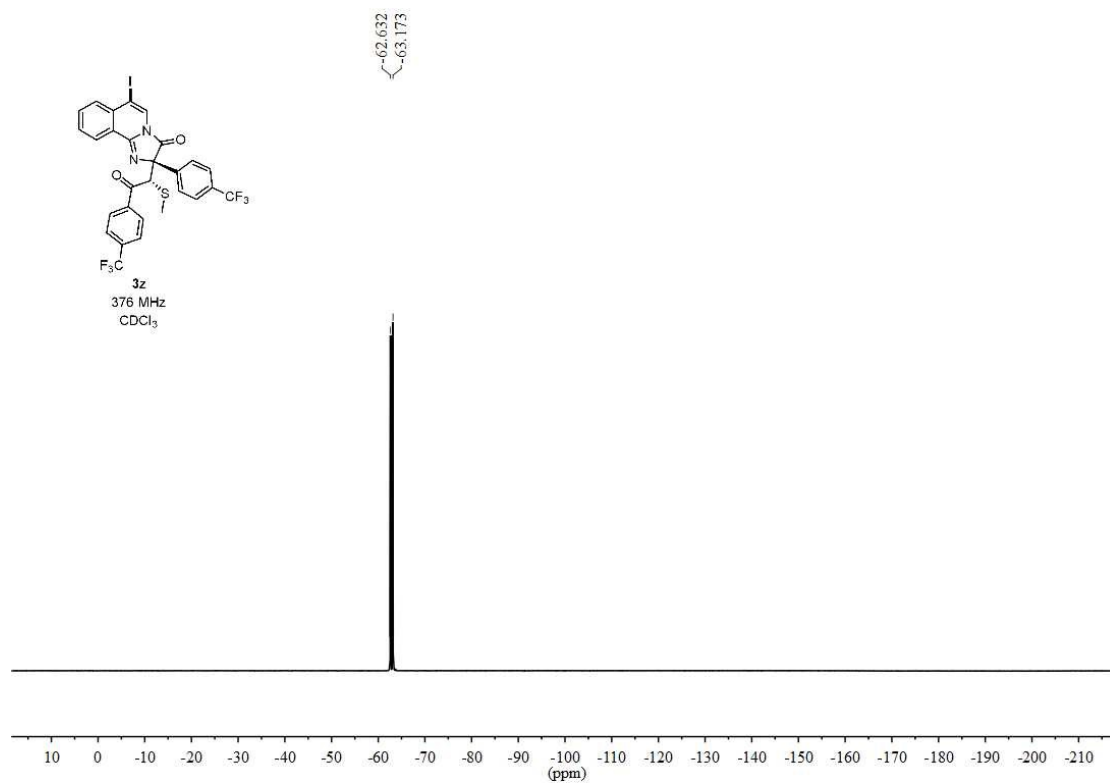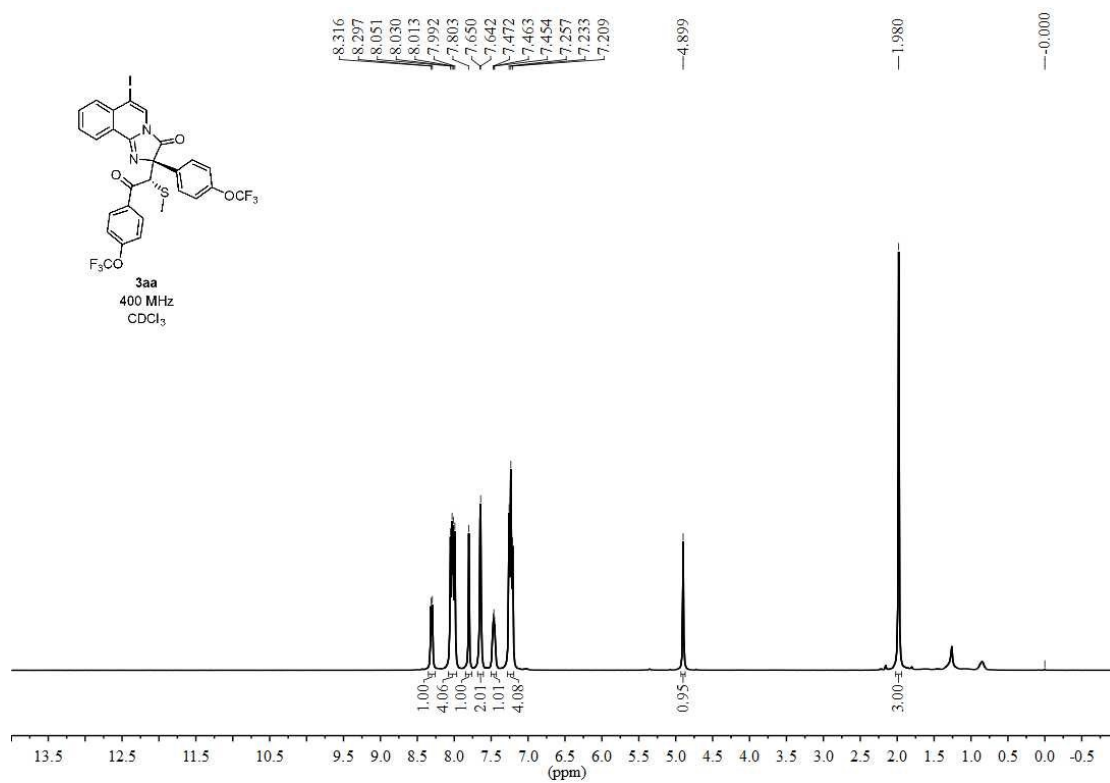

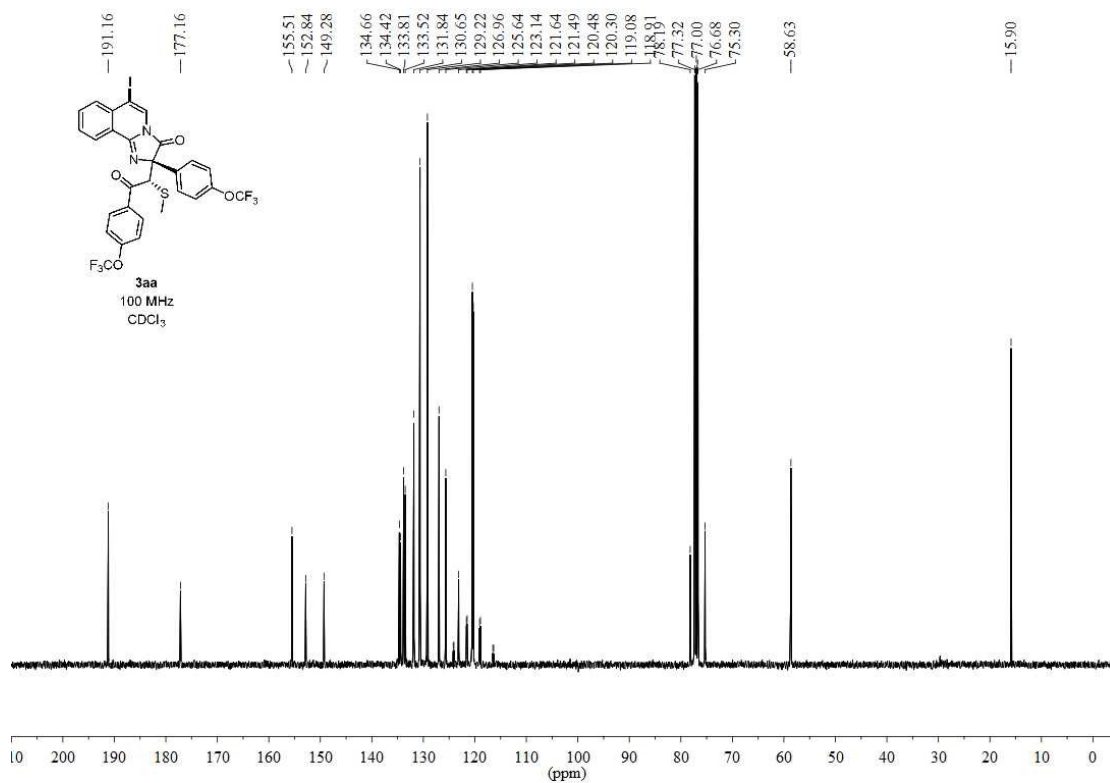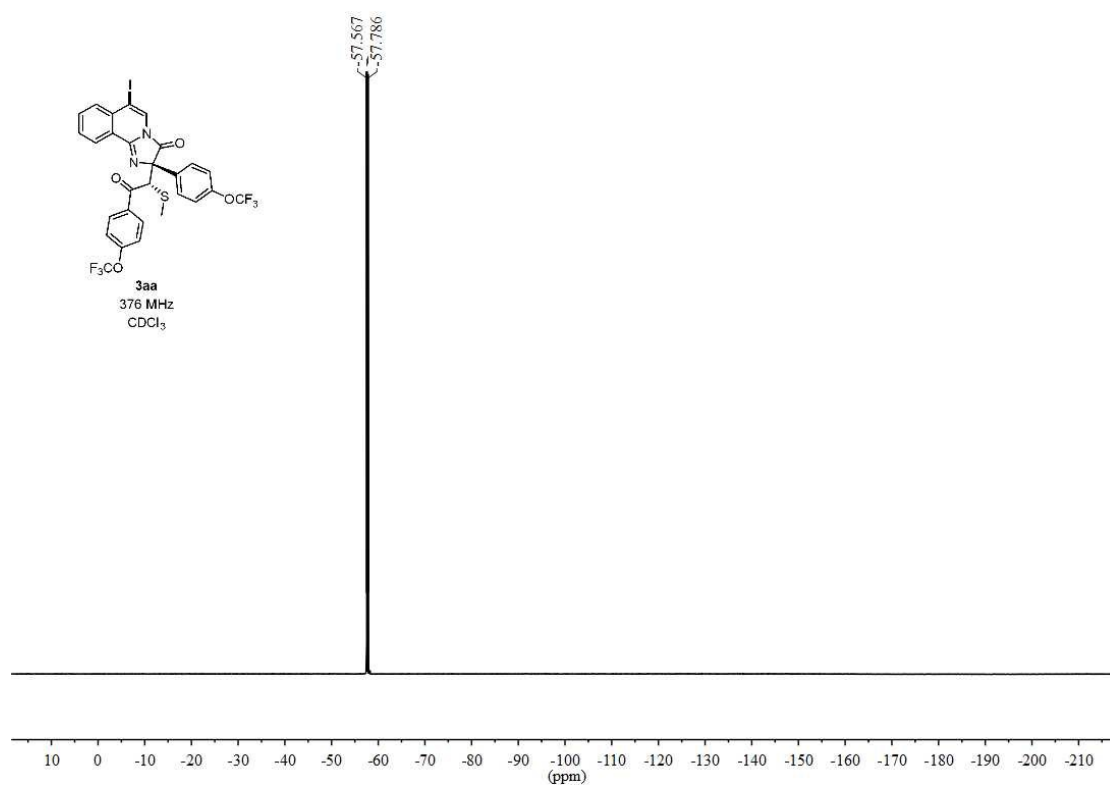



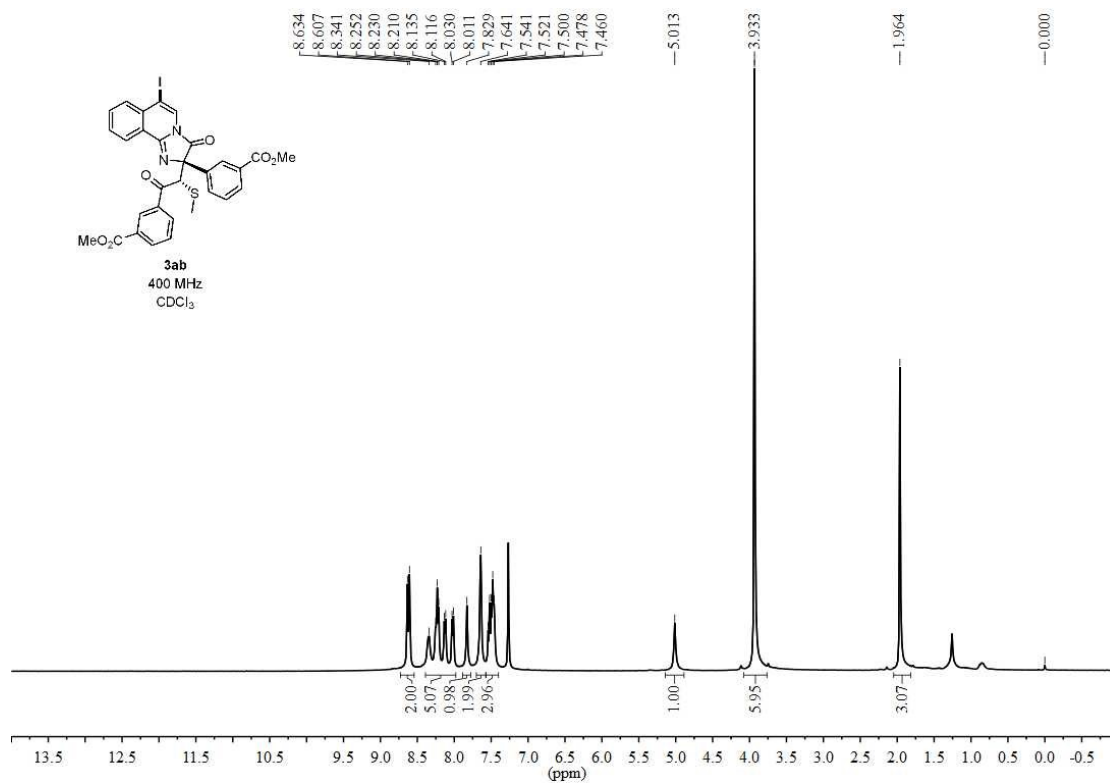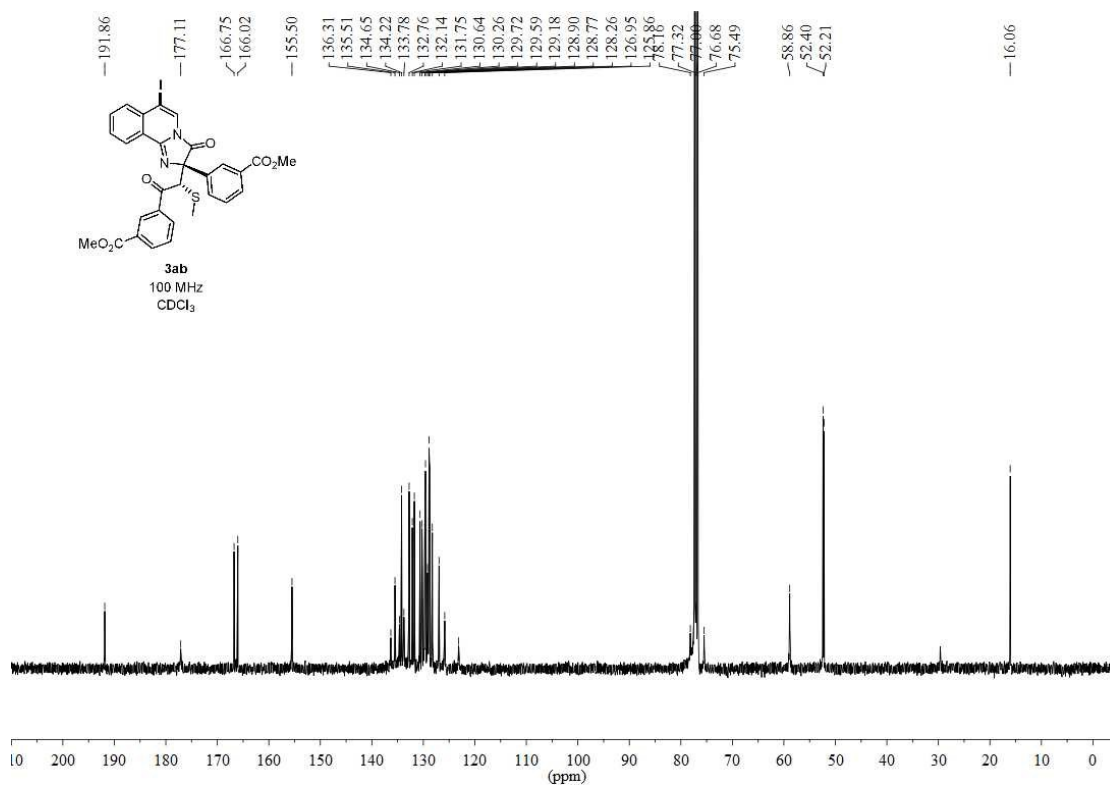

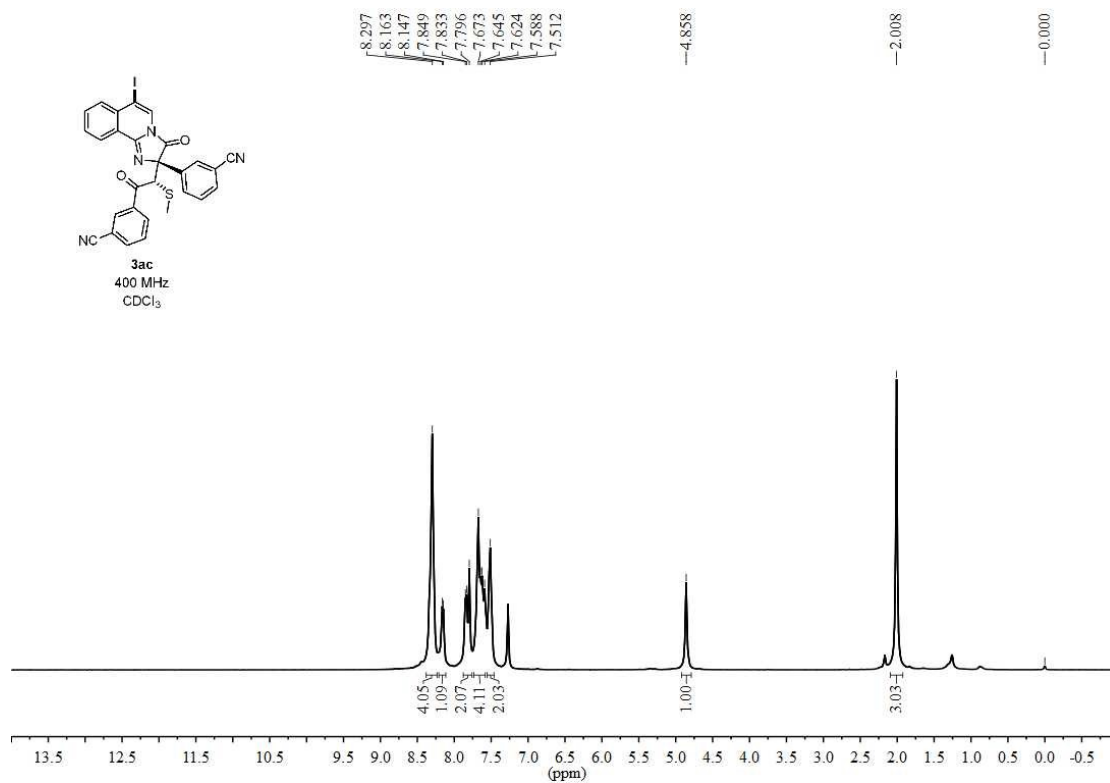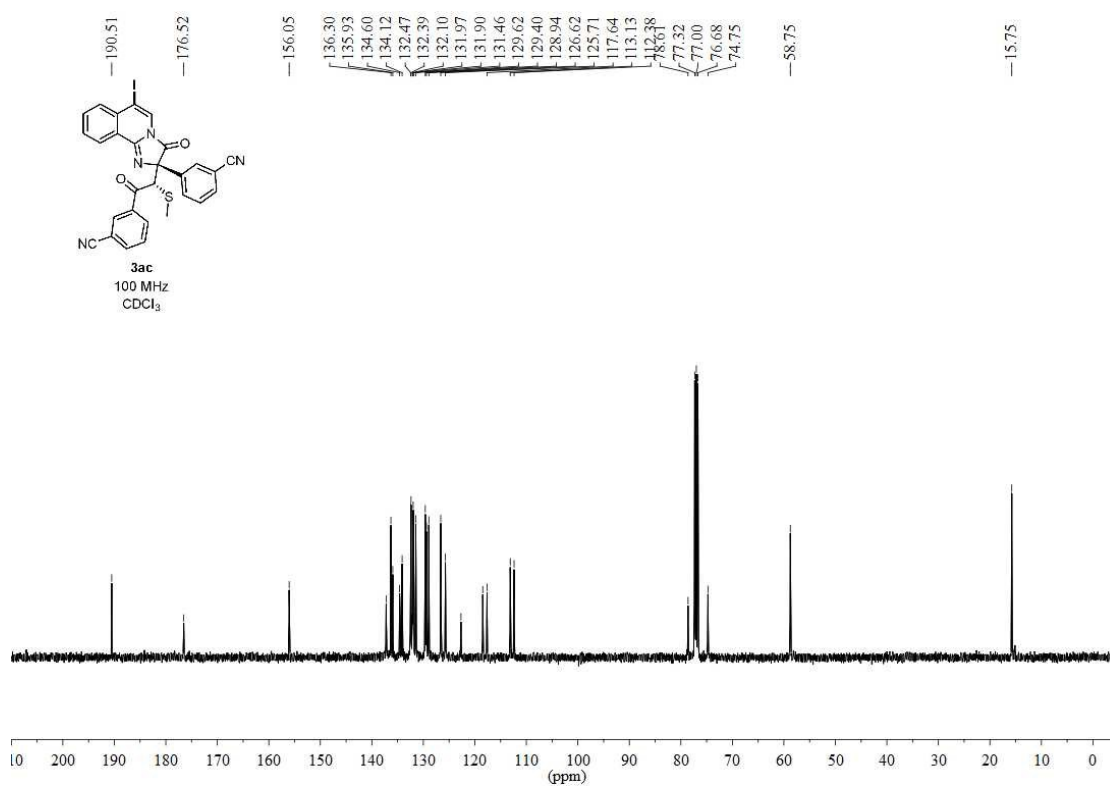

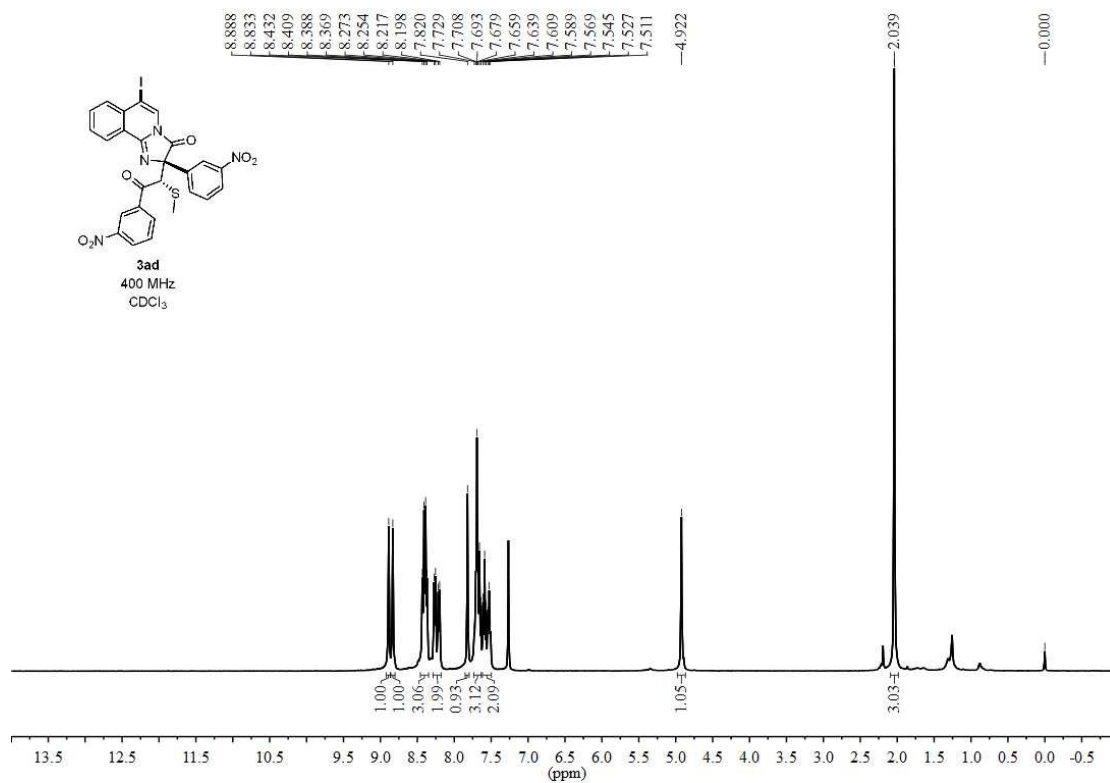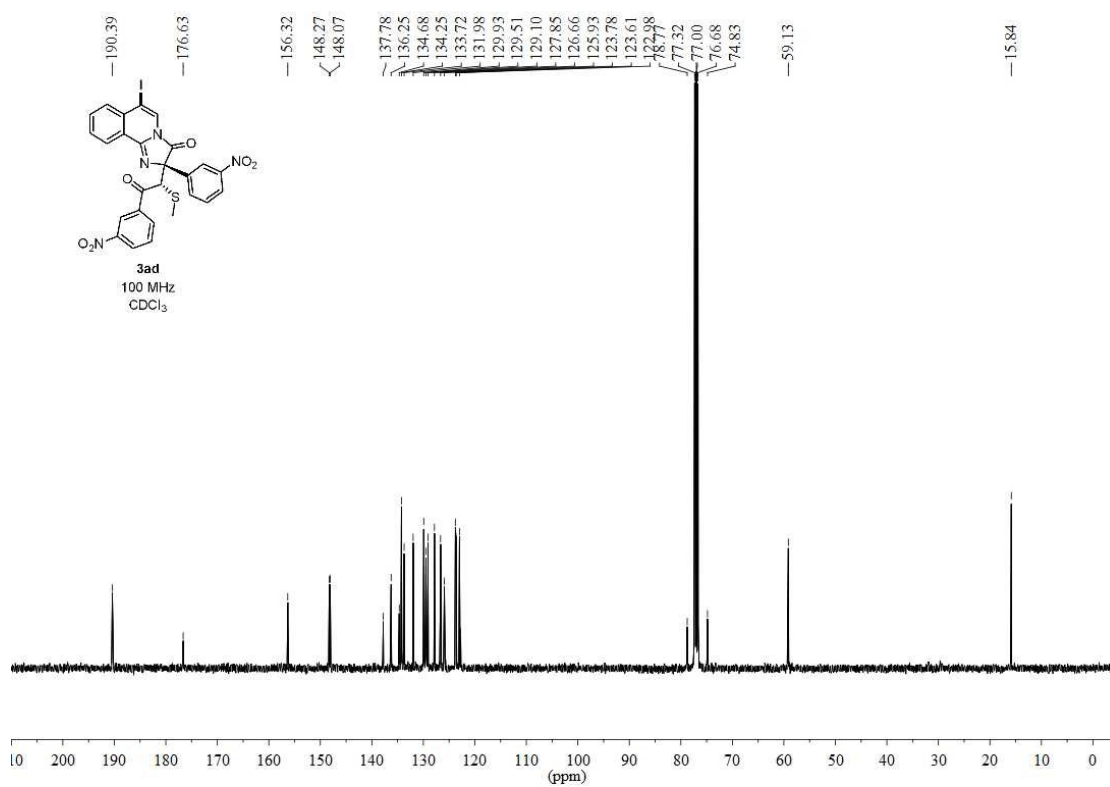

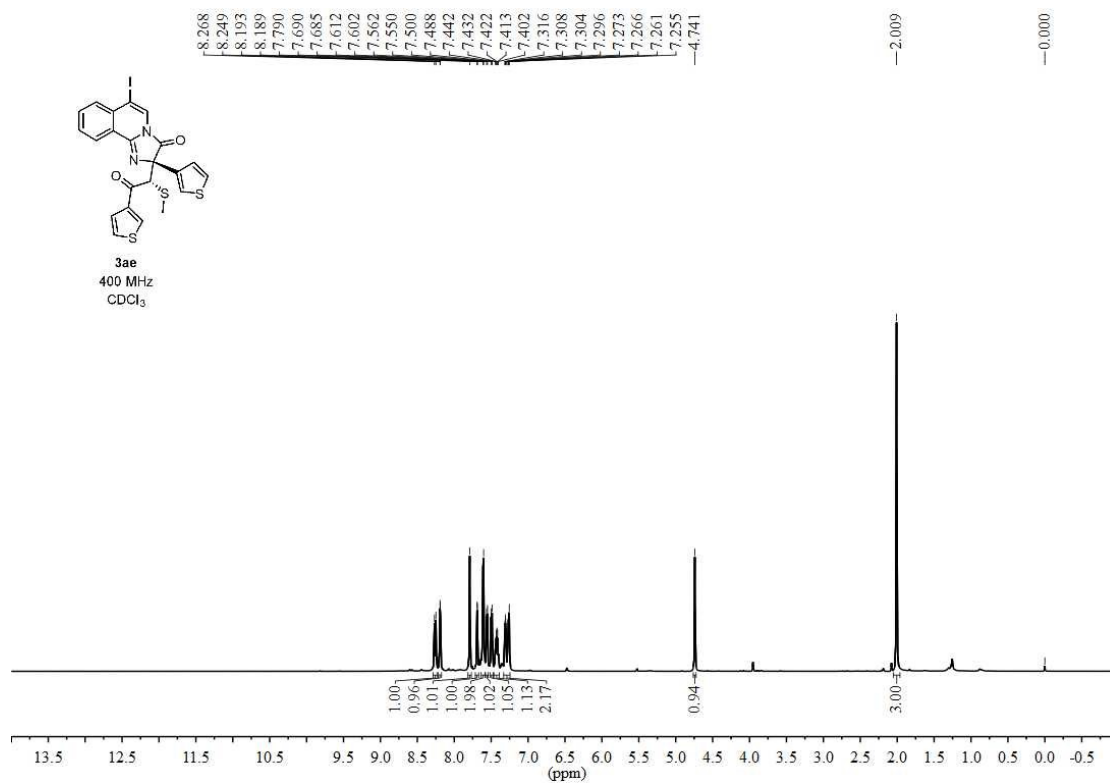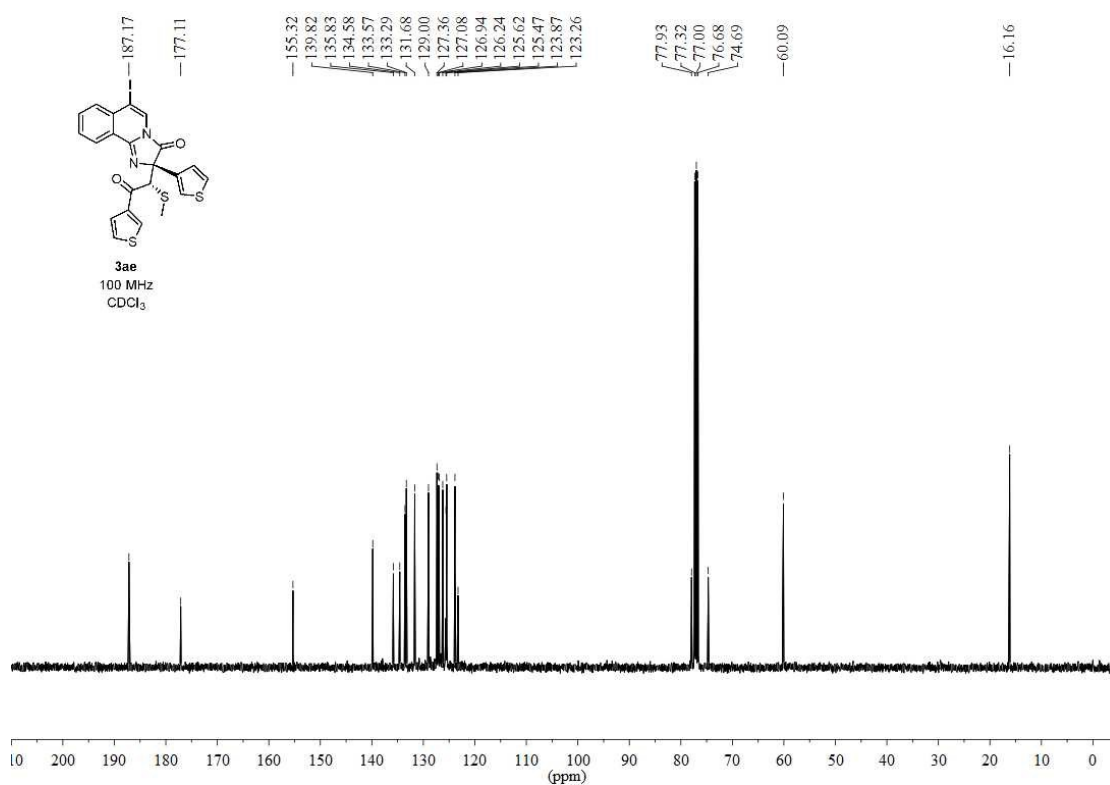

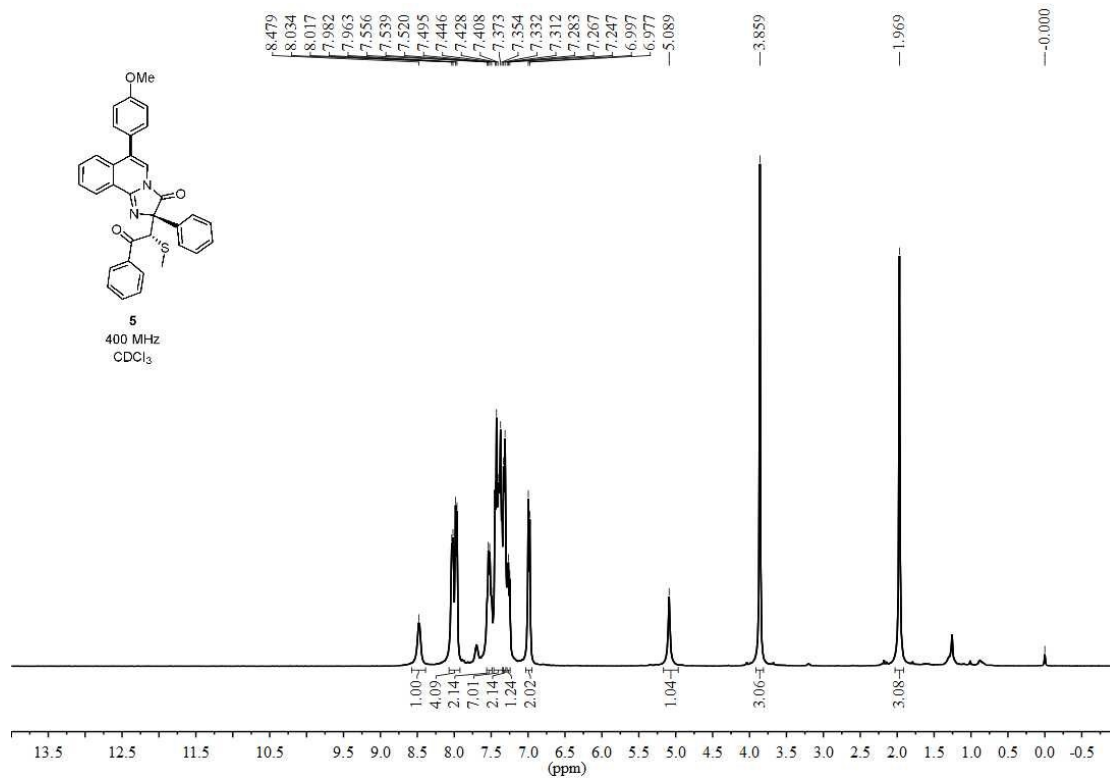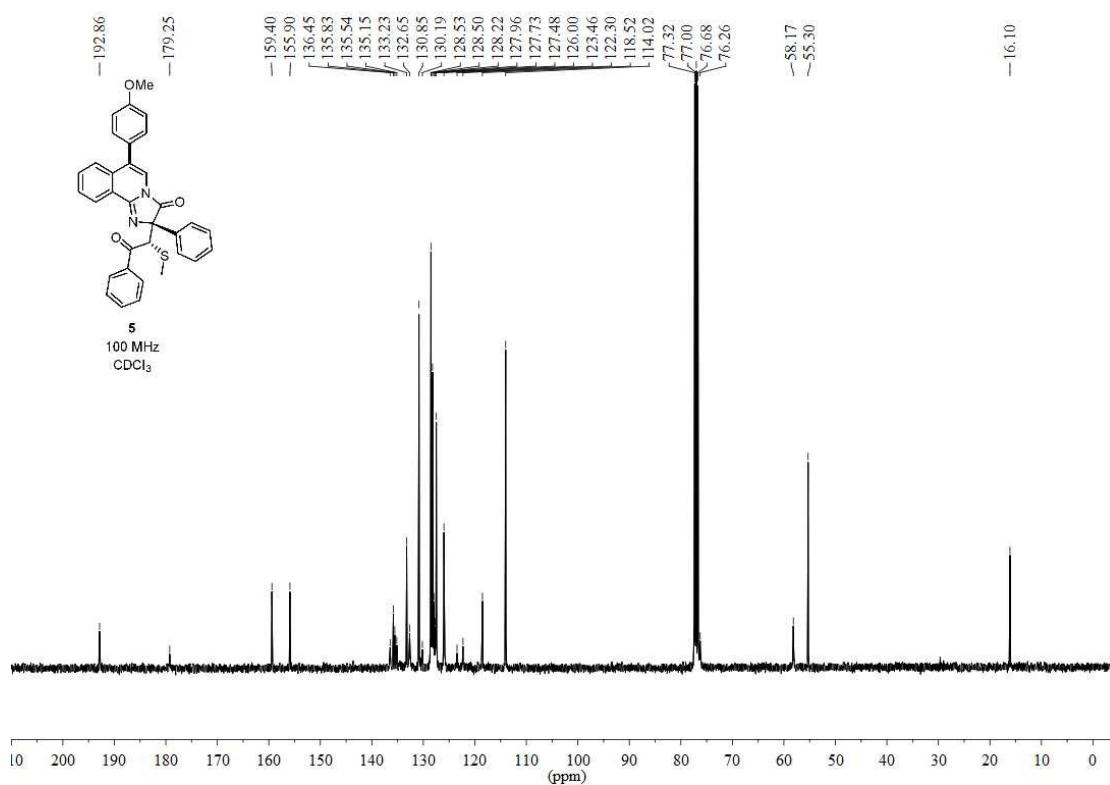

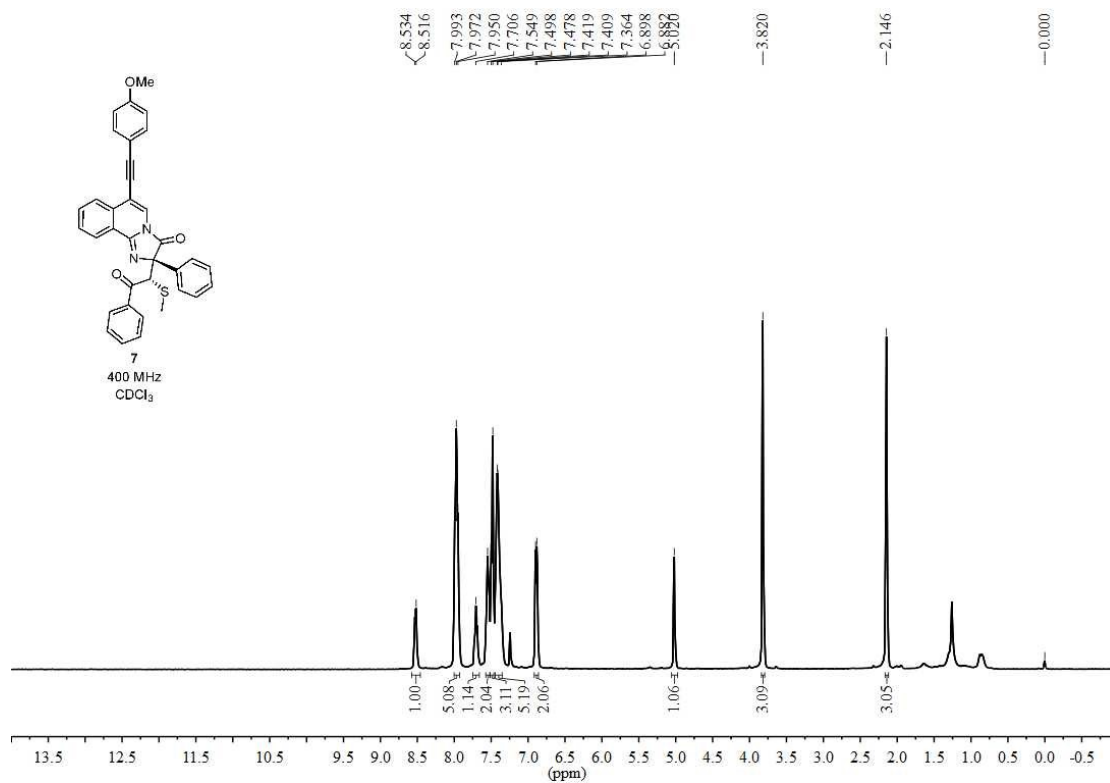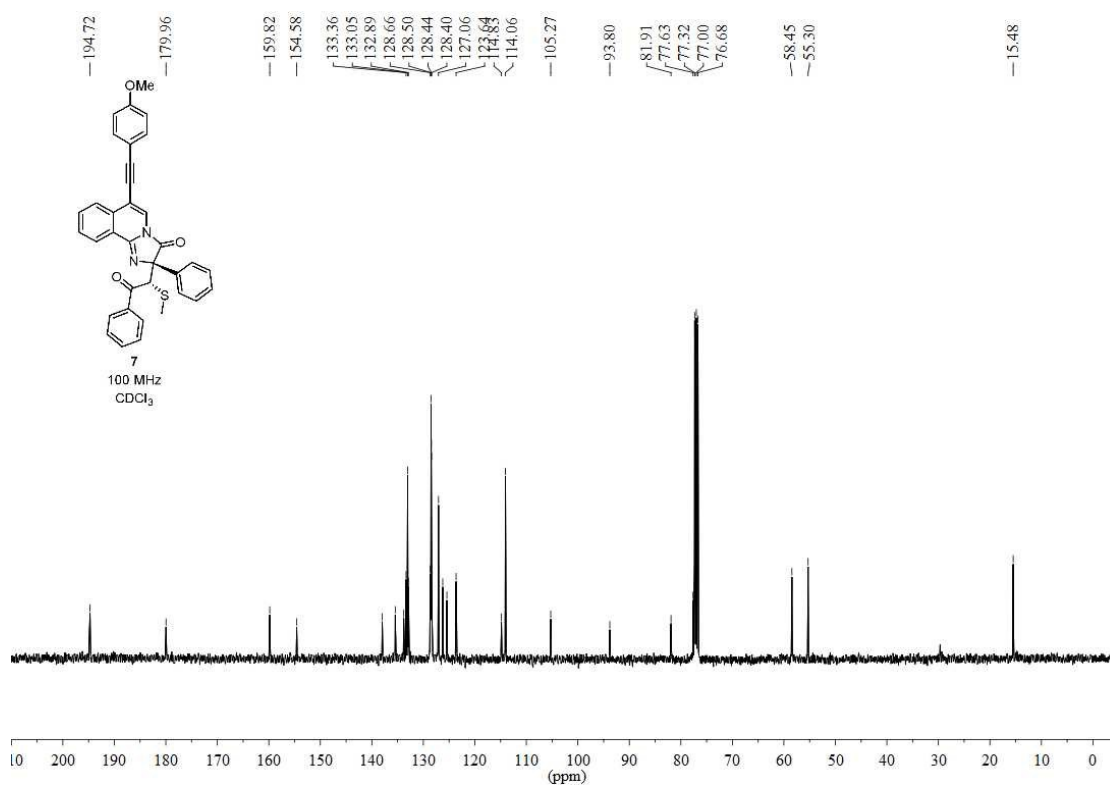

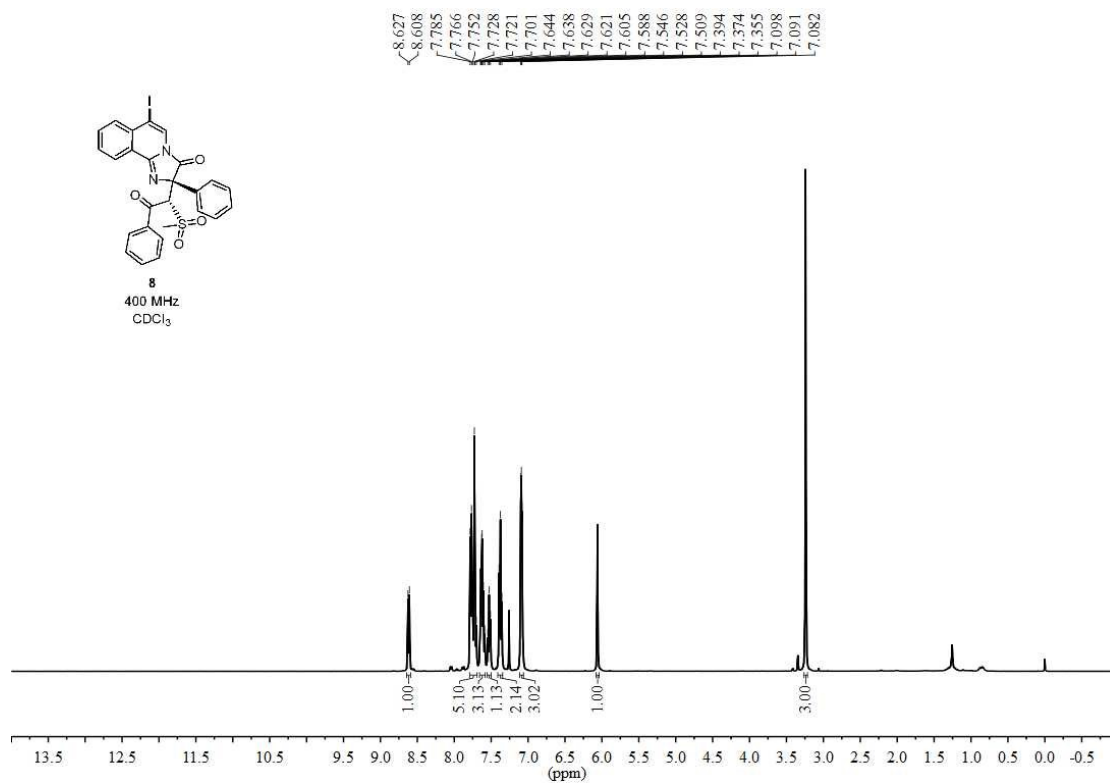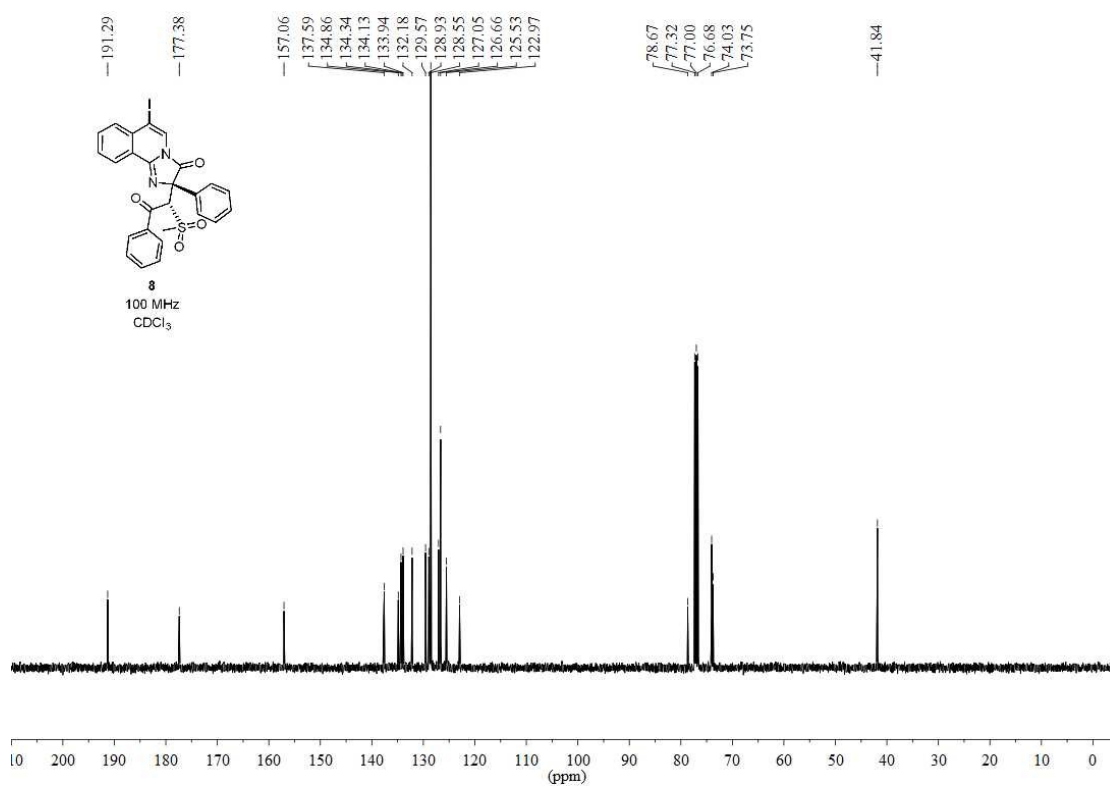

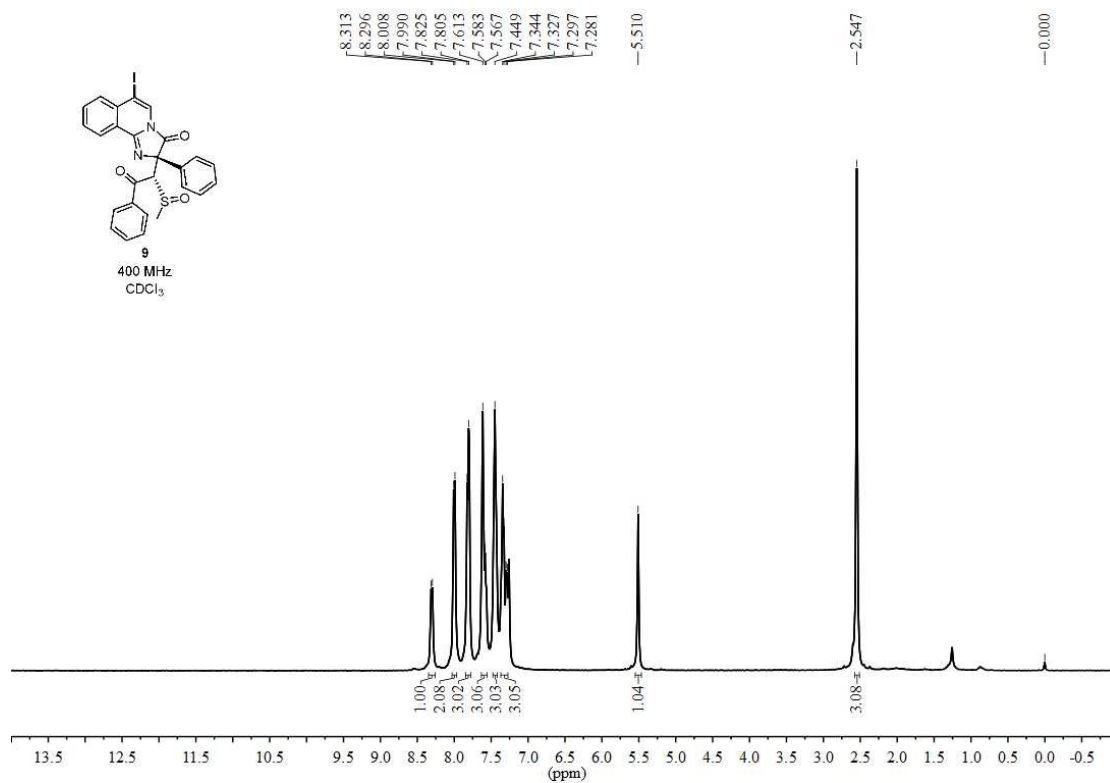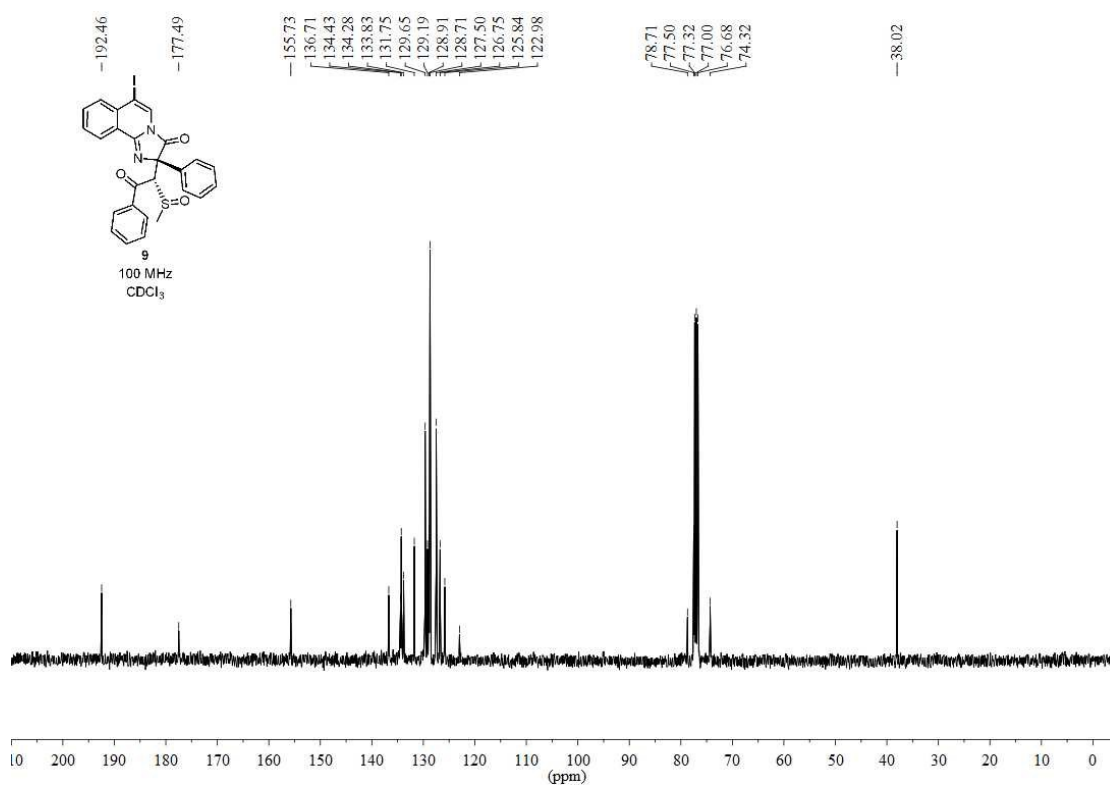



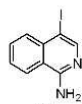

400 MHz  
CDCl<sub>3</sub>

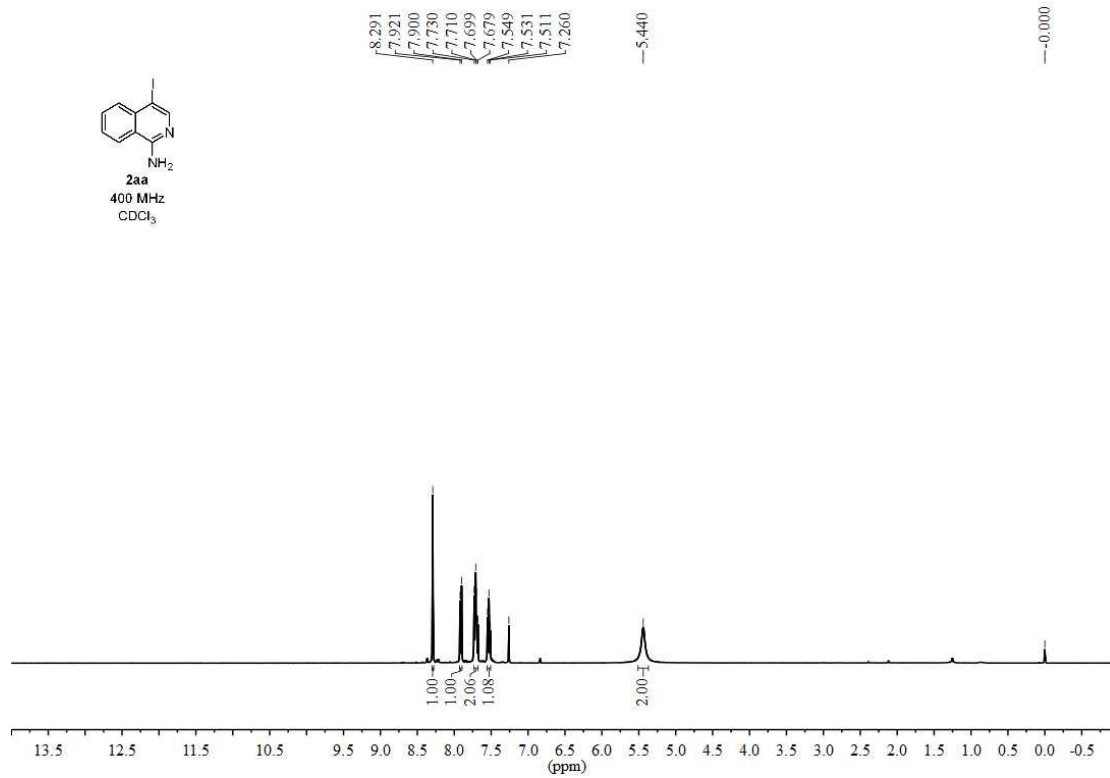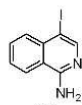

100 MHz  
CDCl<sub>3</sub>

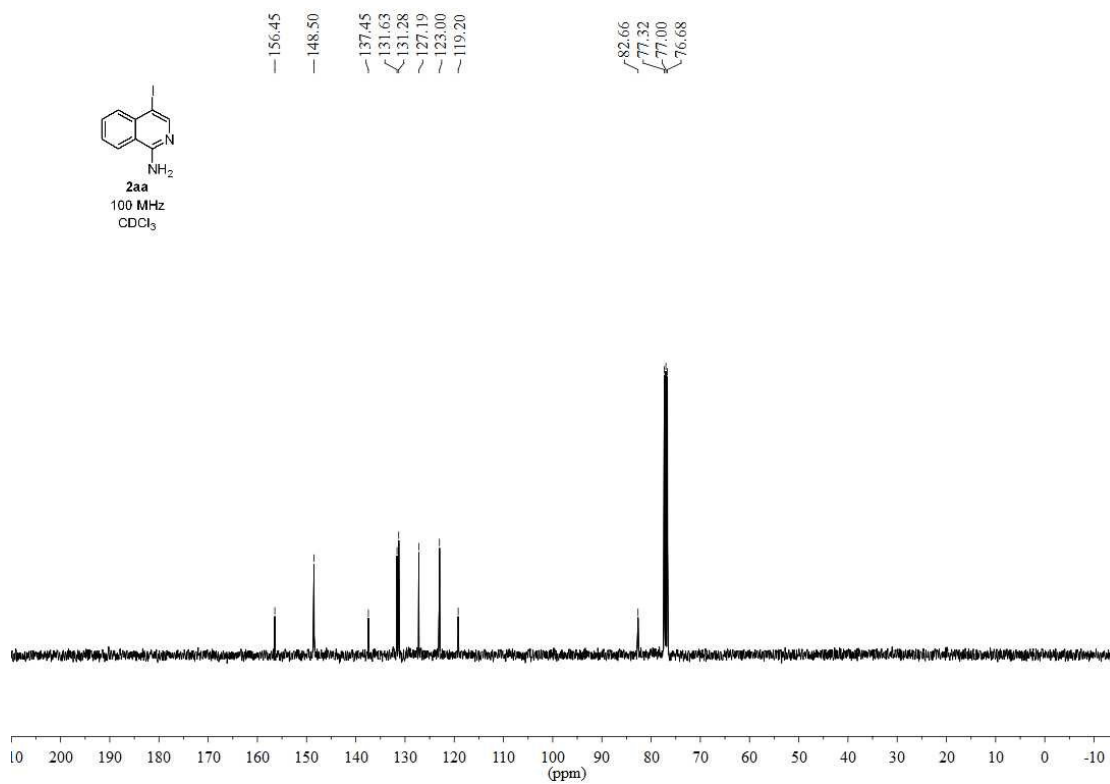

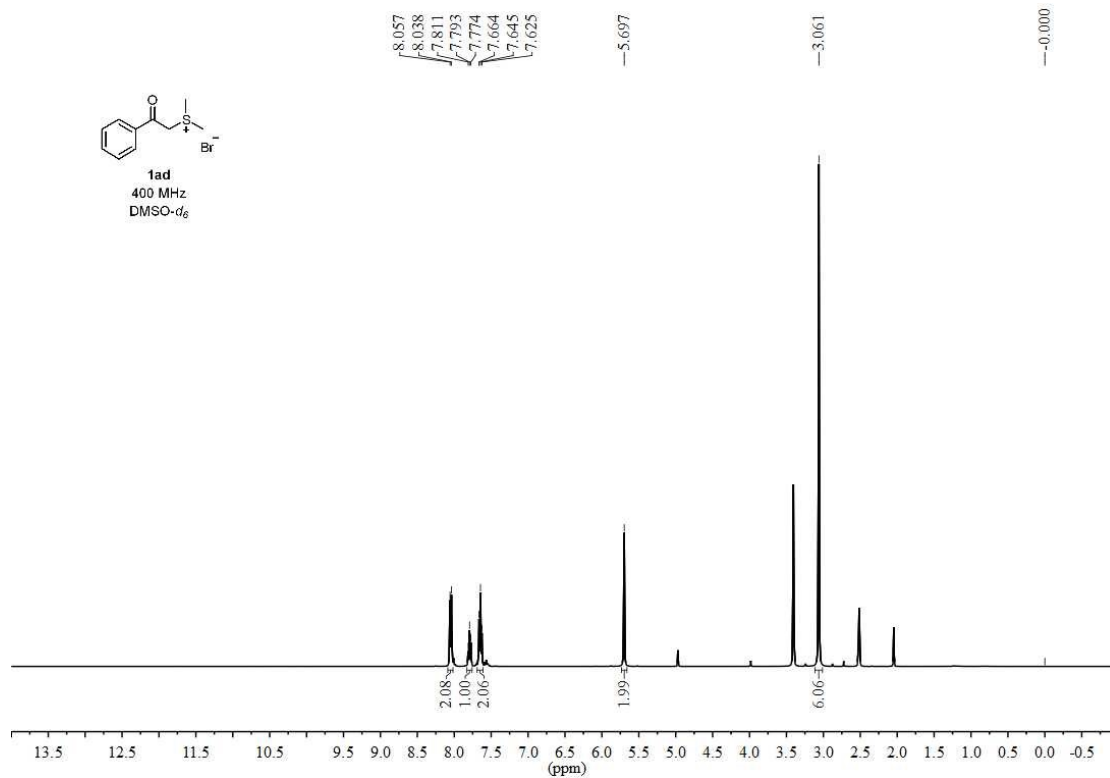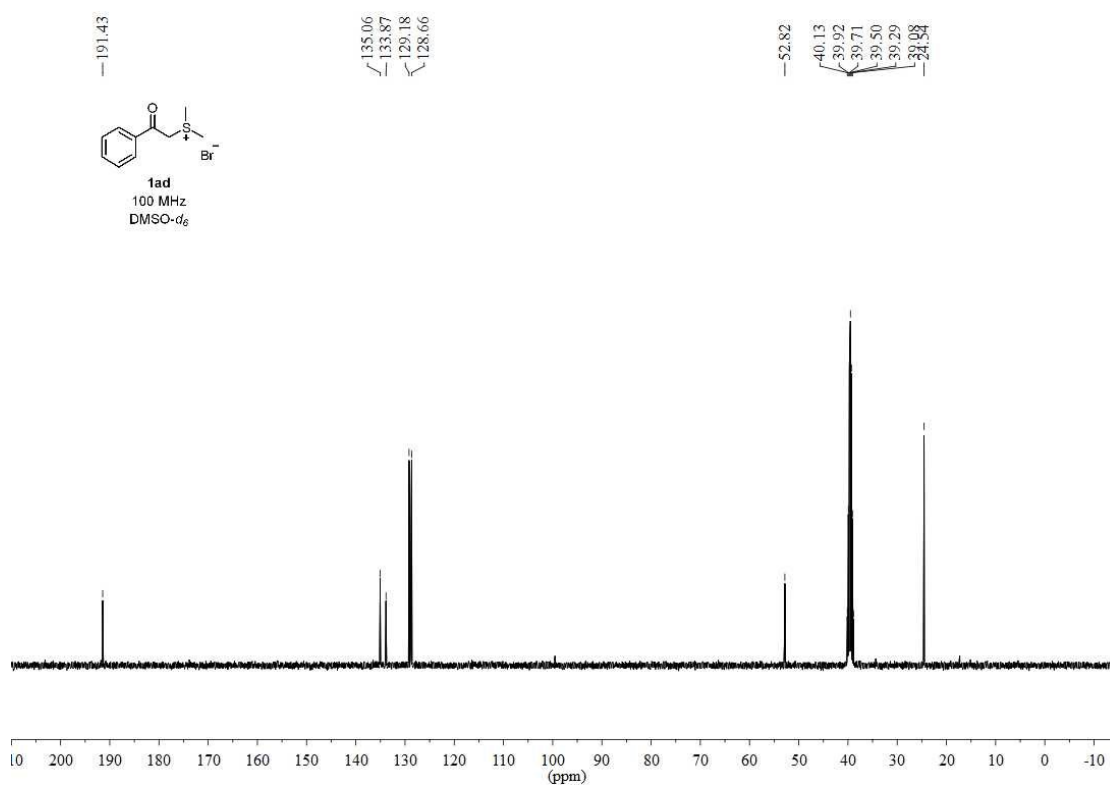

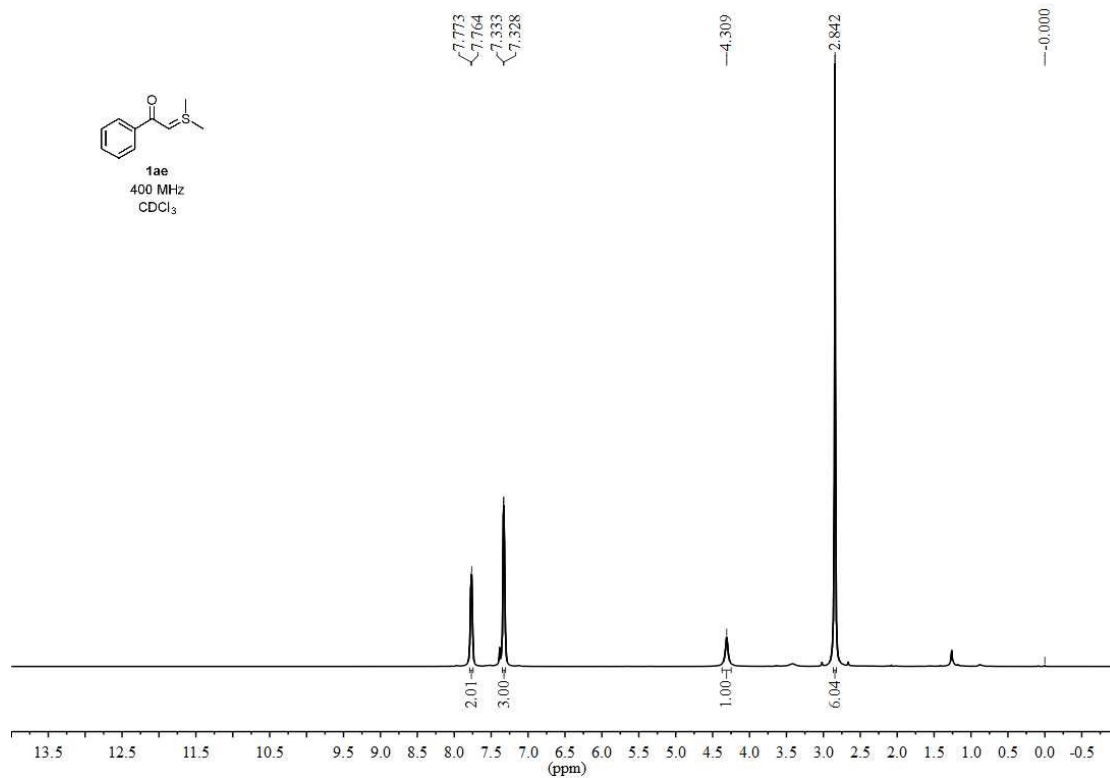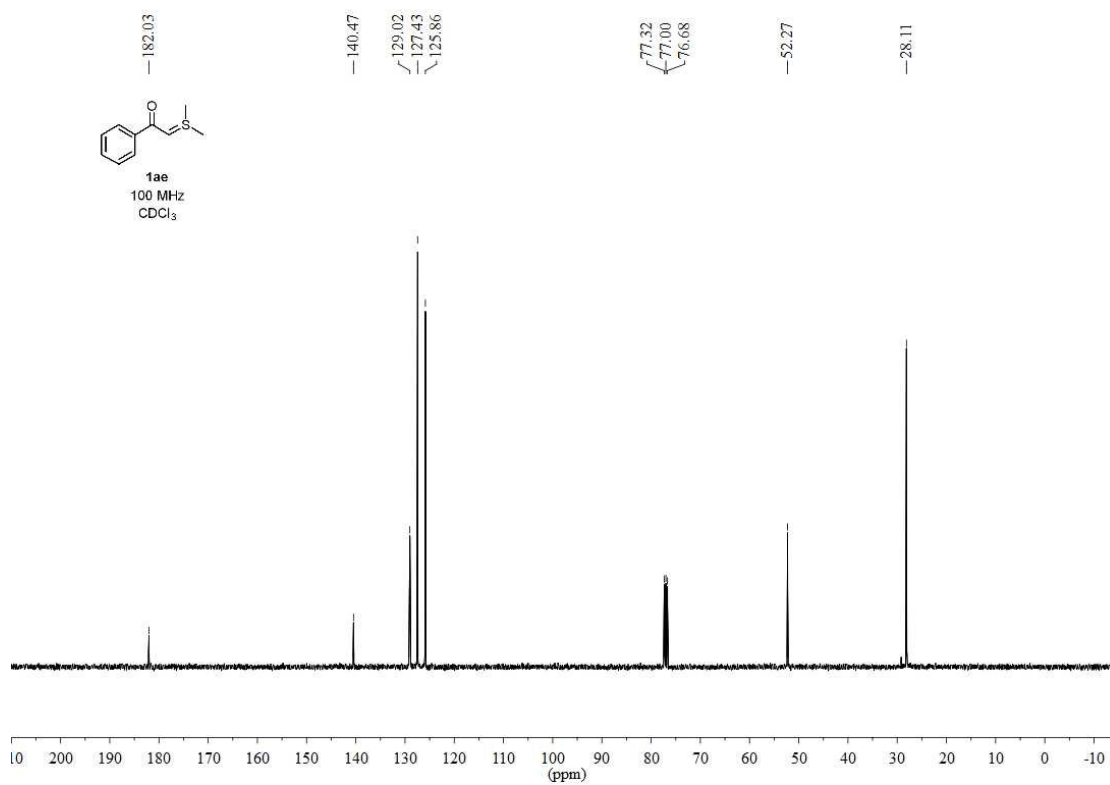

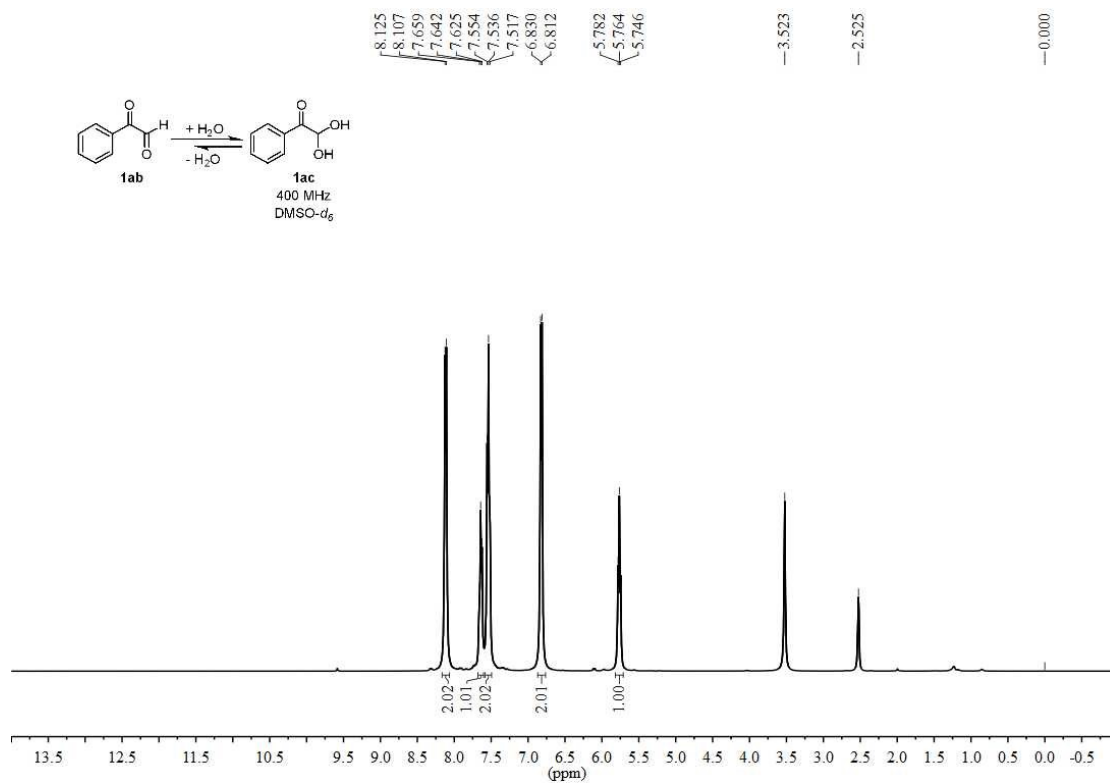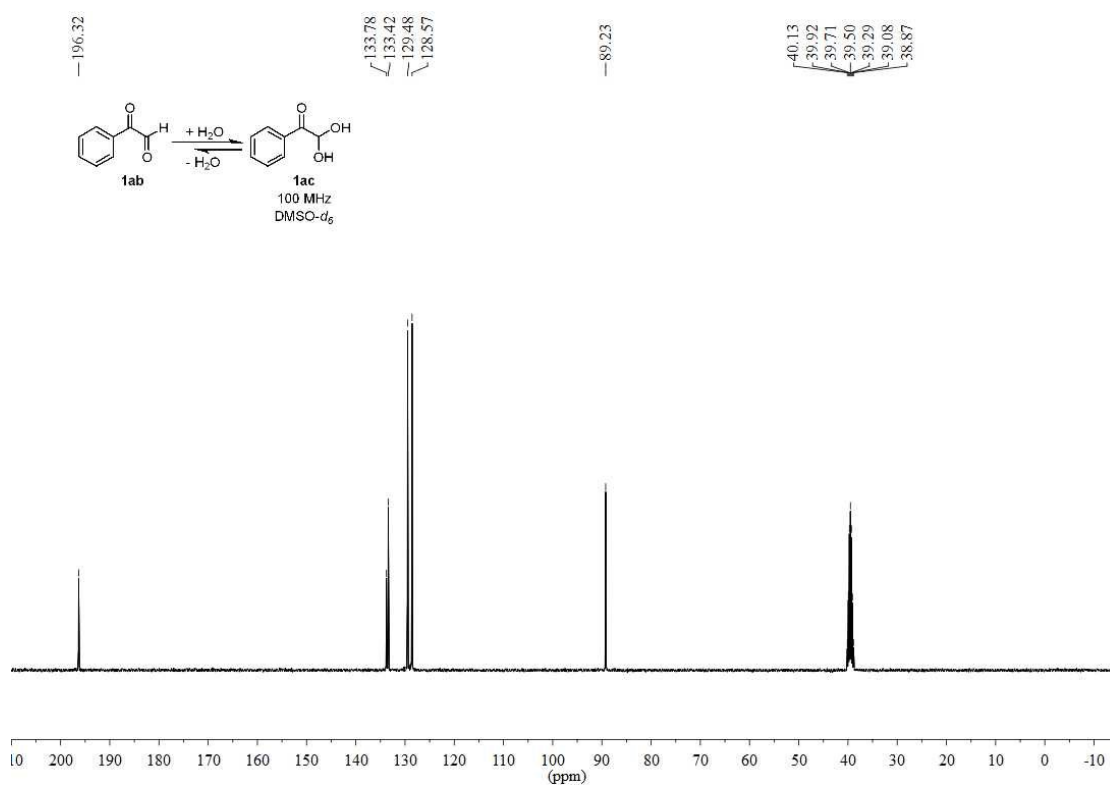

Supplement: d3qo00724c1.pdf [file d3qo00724c1.pdf]
